1     ***Akkermansia muciniphila* identified as key strain to alleviate gut**  
2                     **barrier injury through Wnt signaling pathway**

3     Xin Ma <sup>a,b</sup>, Meng Li <sup>a,b</sup>, Yuanyuan Zhang <sup>b</sup>, Tingting Xu <sup>b</sup>, Xinchen Zhou <sup>a,b</sup>, Mengqi Qian <sup>b</sup>,  
4                                     Zhiren Yang <sup>a,b</sup>, Xinyan Han <sup>a,b,\*</sup>

5     <sup>a</sup> Hainan Institute of Zhejiang University, Yongyou Industry Park, Yazhou Bay Sci-Tech City,  
6     Sanya 572000, China

7     <sup>b</sup> Key Laboratory of Animal Nutrition and Feed Science in East China, Ministry of  
8     Agriculture, College of Animal Sciences, Zhejiang University, Hangzhou 310058, China

9     \*Corresponding author

10    Xinyan Han

11    College of Animal Sciences, Zhejiang University, 866 Yuhangtang Road, Hangzhou 310058,

12    China

13    E-mail: [xyhan@zju.edu.cn](mailto:xyhan@zju.edu.cn)

14

15    Credit author statement

16            XH and XM: Designed the experiments; XM and TX: Performed the experiments; XZ  
17    and MQ: Analyzed the data; XM and ML: Wrote the manuscript, which was edited by YZ, TX,  
18    MQ, XZ, ZY and HX. All authors read and approved the final manuscript.

19

20 **ABSTRACT**

21 As the largest mucosal surface, the gut has built a physical, chemical, microbial and  
22 immune barrier to protect the body against pathogen invasion. The disturbance of gut  
23 microbiota aggravates pathogenic bacteria invasion and gut barrier injury. Fecal microbiota  
24 transplantation (FMT) is a promising treatment for microbiome-related disorders, where  
25 beneficial strain engraftment is a significant factor influencing FMT outcomes. The aim of  
26 this research was to explore the effect of FMT on antibiotic-induced microbiome-disordered  
27 (AIMD) model infected with enterotoxigenic *Escherichia coli* (ETEC). We used piglet, mouse  
28 and intestinal organoid models to explore the protective effects and mechanisms of FMT on  
29 ETEC infection. The results showed that FMT regulated gut microbiota and enhanced the  
30 protection of AIMD piglets against ETEC K88 challenge, as demonstrated by reduced  
31 intestinal pathogen colonization and alleviated gut barrier injury. *Akkermansia muciniphila* (*A.*  
32 *muciniphila*) and *Bacteroides fragilis* (*B. fragilis*) were identified as two strains that may play  
33 key roles in FMT. We further investigated the alleviatory effects of these two strains on ETEC  
34 infection in AIMD mice model, which revealed that *A. muciniphila* and *B. fragilis* relieved  
35 ETEC-induced intestinal inflammation by maintaining the proportion of Treg/Th17 cells and  
36 epithelial damage by moderately activating the Wnt/ $\beta$ -catenin signaling pathway, while the  
37 effect of *A. muciniphila* was better than *B. fragilis*. We therefore identified whether *A.*  
38 *muciniphila* protected against ETEC infection using basal-out and apical-out intestinal  
39 organoid models. *A. muciniphila* did protect the intestinal stem cells and stimulate  
40 proliferation and differentiation of intestinal epithelium, and the protective effects of *A.*  
41 *muciniphila* was reversed by Wnt inhibitor. FMT alleviated ETEC-induced gut barrier injury  
42 and intestinal inflammation in AIMD model. *A. muciniphila* was identified as key strain in  
43 FMT to promote proliferation and differentiation of intestinal stem cells by mediating the  
44 Wnt/ $\beta$ -catenin signaling pathway.

45 **Keywords:** *Akkermansia muciniphila*; Wnt/ $\beta$ -catenin signaling pathway; Apical-out intestinal  
46 organoids; Gut barrier injury; Fecal microbiota transplantation.

47

## 48 **Introduction**

49 Growing evidence suggests that gut microbiota and its metabolites play important roles  
50 in modulating host health (*Canfora et al., 2019; Ghosh et al., 2021; Zheng et al., 2021*). The  
51 most drastic exposure that leads to intestinal microbiota dysbiosis is antibiotic treatment,  
52 which kills commensal micro-organisms and inhibits these microbiota-mediated immune  
53 defense (*Andremont et al., 2021; Buffie and Pamer, 2013*). The disturbance of intestinal  
54 microbiota may lead to disruptions of gut barrier and increase the susceptibility of host to  
55 pathogenic microbes (*Flint et al., 2012; Witkowski et al., 2020*). Several clinical studies have  
56 demonstrated that early-life exposure to antibiotic leads to gut microbiota dysbiosis that can  
57 impair host immune system maturation (*An et al., 2014; Nguyen et al., 2020*). Furthermore,  
58 the negative impact of antibiotics on gut microbiota in early life may even last for long  
59 periods throughout a lifetime, increasing the risk of gut diseases (*Francino, 2016*).  
60 Enterotoxigenic *Escherichia coli* (ETEC) K88 infection is a common cause of diarrhea in  
61 humans and animals (*Dubreuil, 2021*). When ETEC adheres to intestinal epithelial cells,  
62 virulence factors interact with specific receptors to induce intestinal barrier injury and  
63 intestinal inflammatory responses (*Yu et al., 2018*). Fecal microbiota transplantation (FMT) is  
64 a therapeutic intervention for reconstructing gut microbiota in gastrointestinal inflammatory  
65 diseases (*Borody et al., 2019; Colman and Rubin, 2014*). Since FMT has been successful in  
66 treating *Clostridioides difficile* infection and maintaining gut barrier, emerging investigation  
67 has been focused on other diseases (*Quraishi et al., 2017*). However, whether FMT could  
68 remedy against ETEC K88 infection in antibiotic-induced gut microbiota-disordered (AIMD)  
69 piglets is still unknown. Simultaneously, the underlying mechanism of FMT and the gut  
70 microbes that confer its efficacy remain unclear.

71 Intestinal stem cell renewal is vital for the maintenance of gut barrier (*Beumer and*  
72 *Clevers, 2021*). Mammalian intestinal epithelial cells are renewed approximately every 3-5  
73 days with the migration of undifferentiated intestinal cells from the crypt to the top of the villi,  
74 accompanied by the differentiation of different types of epithelial cells (*Luo et al., 2022*). The  
75 proliferation and differentiation of intestinal epithelium driven by intestinal stem cells, mainly

76 crypt base columnar cells expressing R-Spondin receptor Lgr5, is a necessary process for  
77 repairing intestinal barrier injury to prevent pathogen invasion (*Yan et al., 2017*). *Sato et al.*  
78 (2009) successfully cultured isolated intestinal stem cells into three-dimensional intestinal  
79 organoids with villous and crypt-like structural morphology for the first time. Intestinal  
80 organoids contain various terminally differentiated cell types, including intestinal stem cell,  
81 tuft cell, absorptive cell, enteroendocrine cell, goblet cell, and Paneth cell, which have more  
82 advantages over single cell lines for *in vitro* study of intestinal regeneration (*Sprangers et al.,*  
83 *2021*). Intestinal organoid is an ideal model for studying the interaction between intestinal  
84 epithelium and microorganisms *in vitro*, which can eliminate the complexity of animal models  
85 (*Yin et al., 2019*). In traditional basal-out intestinal organoid models, the intestinal epithelium  
86 was in the interior of organoid spheroid, which restricted the interaction between intestinal  
87 epithelium and gut microbiota. *Co et al. (2019)* first established the intestinal organoid model  
88 with polarity reversal in human and mouse, which optimizes the shortcomings of  
89 microinjection in terms of heterogeneous exposure concentrations and durations, as well as  
90 destruction of organoid walls, and evaluated the infection effects of the invasive pathogens  
91 with different polarity-specific patterns.

92 In the present study, we first investigated the effects of FMT on ETEC K88 infection in  
93 AIMD neonatal piglets, then by using bacterial 16S rDNA sequencing analysis, we identified  
94 *Akkermansia muciniphila* (*A. muciniphila*) as potential microbe to alleviate ETEC-induced  
95 intestinal barrier injury. We further hypothesized that *A. muciniphila* could relieve intestinal  
96 barrier injury and intestinal inflammation by modulating the proliferation and differentiation  
97 of intestinal epithelium, and verified this hypothesis using *in vivo* mice experiments as well as  
98 *in vitro* porcine intestinal organoid models. Collectively, our results may provide theoretical  
99 basis that *A. muciniphila* is a promising method to repair intestinal barrier damage and a new  
100 strategy for the precise application of *A. muciniphila* in livestock production.

101

102 **Materials and methods**

103 **Ethics statement**

104 All animal experiments were performed according to the guidelines of the Animal Care  
105 Committee of Zhejiang University School of Medicine (permit number SYXK 2012-0178).  
106 The animal care protocol was approved by the Local Committee of Animal Use following the  
107 Guide for the Care and Use of Laboratory Animals (NIH publication 86-23 revised 1985).

108

### 109 **Preparation of fecal microbiota suspension and bacterial strains**

110 The fecal microbiota suspension was prepared according to our previous method (*Ma et*  
111 *al., 2021*). In short, healthy adult Jinhua pigs that administrated medicinal feed additives or  
112 drugs for more than 3 months were selected as fecal donors. The potential risks and infectious  
113 pathogens in donor pigs were determined by serological and stool testing to ensure the safety  
114 of the porcine FMT. Fresh fecal samples that collected from Jinhua pigs were transported in  
115 AnaeroPack (Mitsubishi Gas Chemical, Japan) on ice to laboratory within 2 hours. The 50 g  
116 fecal samples were homogenized in 250 mL sterile phosphate-buffered saline solution (PBS),  
117 filtered through sterile stainless-steel strainer, and then centrifuged at 4000 rpm for 10 min.  
118 The precipitate was resuspended in sterile PBS solution containing 10% sterile glycerol, and  
119 the fecal microbiota suspension was stored at -80°C. All the above preparation was performed  
120 in an anaerobic incubator (AW400SG anaerobic workstations; Electrotek, UK). All the  
121 facilities and tools for the preparation of the fecal microbiota suspension were sterilized prior  
122 to use. When processing the FMT, the fecal microbiota suspension was thawed in 37°C water  
123 bath. ETEC K88 serotype O149:K91:K88ac was purchased from the China Institute of  
124 Veterinary Drug Control (Beijing China), cultured in Luria-Bertani medium (Qingdao Hope  
125 Bio-Technology Company, China), and incubated at 37°C in a shaker with 250 rpm overnight.  
126 *A. muciniphila* ATCC BAA-835 and *Bacteroides fragilis* (*B. fragilis*) ATCC 25285 were  
127 purchased from Guangdong Microbial Culture Collection Center (GDMCC, Guangzhou,  
128 China). *A. muciniphila* was cultured in brain heart infusion media (OXOID, Thermo Fisher  
129 Biochemicals Ltd., UK) supplemented with 0.1% mucin (Sigma-Aldrich, USA). *B. fragilis*  
130 was cultured in trypticase soy broth (Qingdao Hope Bio-Technology Company, China)  
131 supplemented with 5% defibrinated sheep blood (Qingdao Hope Bio-Technology Company,

132 China). These two anaerobic bacteria strains were incubated at 37°C in an anaerobic incubator  
133 with 10% H<sub>2</sub>, 10% CO<sub>2</sub>, and 80% N<sub>2</sub> (AW400SG anaerobic workstations; Electrotek, UK).  
134 The cultures were centrifuged for 10 min at a speed of 4000 rpm, and the pellets were then  
135 resuspended in either aerobic or anaerobic PBS.

136

### 137 **Animals**

138 A total of 9 litters (9-11 piglets per litter) of Duroc × Landrace × Yorkshire ternary  
139 hybrid neonatal piglets (aged 5 days) with identical birth dates and parities were obtained  
140 from Anji Lvjiayuan Animal Husbandry Co. Ltd. (Zhejiang, China). Piglets were individually  
141 housed in pens with appropriate environment of 24-26°C and 55-65% humidity. All newborn  
142 piglets were fed with artificial milk substitutes, in which the nutrients reached the  
143 requirements recommended by the National Research Council (NRC, 2012), and had *ad*  
144 *libitum* access to water.

145 A total of 130 female C57BL/6 mice aged 5 weeks were obtained from Shanghai SLAC  
146 Laboratory Animal, Co., Ltd. (SCXK (Zhejiang) 2017-0005; Shanghai, China). Mice were  
147 housed in vinyl isolators in a room with 23 ± 1°C room temperature, 55-65% humidity and 12  
148 h/12 h light/dark schedule. All mice had free access to water and food.

149

### 150 **Experimental design**

151 The piglets were randomly assigned to three groups (three litters per group): the control  
152 group (Con group), the ETEC K88 + PBS group (EP group) and the ETEC K88 + FMT group  
153 (EF group). The piglets in EP and EF groups were orally inoculated with 2 ml ampicillin (120  
154 mg kg<sup>-1</sup>) twice daily on day 1-3 of the experiment to disorder the intestinal resident  
155 microbiota, then orally inoculated with ETEC K88 (1 × 10<sup>9</sup> CFU ml<sup>-1</sup>) suspended in 2 ml  
156 sterile PBS once daily on day 4-6 of the experiment. After ETEC K88 infection, the piglets in  
157 EF group received 1.5 ml fecal microbiota suspension once daily by oral gavage for 6 days,  
158 while the piglets in EP group received the same volume of sterile PBS. Meanwhile, the piglets  
159 in Con group were orally inoculated with the same volume of sterile PBS throughout the

160 experiment. The doses of ampicillin and fecal microbiota suspension were based on a  
161 previous study by Ma et al. [18]. Experimental design of piglets is shown in Figure 1A. The  
162 weight of each piglet was measured at both the beginning and the end of the experiment to  
163 calculate the average daily gain (ADG), and diarrhea score (0, normal feces; 1, moist feces; 2,  
164 mild diarrhea; 3, severe diarrhea) was recorded throughout the experiment. Six piglets (2  
165 piglets per litter) were picked from each group to be slaughtered at the end of the experiment  
166 (Day 13).

167 After acclimating for a week, mice were randomly assigned to four groups (n = 10 each):  
168 the control group (C group), the ETEC K88 + PBS group (E group), the ETEC K88 + *A.*  
169 *muciniphila* group (A group) and the ETEC K88 + *B. fragilis* group (B group). On day 1-3 of  
170 the experiment, the mice in E, A and B groups were orally inoculated with 0.2 ml 15 mg ml<sup>-1</sup>  
171 ampicillin (Sigma-Aldrich, USA) twice daily to disorder the gut microbiota. On day 4-6 of the  
172 experiment, the mice in E, A and B groups were infected with ETEC K88 ( $1 \times 10^9$  CFU)  
173 suspended in 0.2 ml 0.1 M NaHCO<sub>3</sub> buffer (pH 9.0) by oral gavage once daily. Mice were  
174 fasted for 12 h before infection. Meanwhile, the mice in C group were given the equal volume  
175 of sterile PBS on day 1-6 of the experiment. On day 7-13 of the experiment, live *A.*  
176 *muciniphila* ( $1 \times 10^6$  CFU) and live *B. fragilis* ( $1 \times 10^8$  CFU) suspended in 0.2 ml anaerobic  
177 sterile PBS were administered intragastrically once daily to the mice in A group and B group  
178 respectively, while mice in C and E groups received the same volume of anaerobic sterile PBS.  
179 The design of mouse experiment is shown in Figure 1B. Mice were orally infused with 0.2 ml  
180 40 mg ml<sup>-1</sup> 4 kDa fluorescein isothiocyanate-dextran (Sigma-Aldrich, USA) 4 hours before  
181 sampling. At the end of the experiment (Day 14), six mice in each group were randomly  
182 selected for ether anesthesia and neck dislocation.

183

#### 184 **Culture and treatment of porcine intestinal organoid**

185 The cryovial of porcine intestinal organoid was kindly provided by Professor Li  
186 Xiaoliang (Institute of Preventive Veterinary Medicine, College of Animal Sciences, Zhejiang  
187 University, Hangzhou, China). The frozen organoids were thawed in a 37°C-water bath for 2

188 min, and then added 1 ml of DMEM/F-12 (Gibco, USA) with 1% bovine serum albumin  
189 (BSA, BioFroxx, Germany) solution. The contents of the cryovial were mixed and transferred  
190 to the 15 ml conical tube containing 2 ml of DMEM/F-12 with 1% BSA solution, and then  
191 centrifuged at  $200 \times g$  for 5 min at  $4^{\circ}$ . The organoids were resuspended in equal volume of  
192 complete IntestiCult™ Organoid Growth Medium (06010, StemCell™ Technologies, Canada)  
193 and Matrigel Matrix (356231, Corning, USA). The 50  $\mu$ l of the 500-crypt suspension was  
194 plated in the center of each well of the pre-warmed 24-well plate (3524, Corning, USA). The  
195 plate was placed at  $37^{\circ}$  with 5%  $\text{CO}_2$  for 10 min and then added 750  $\mu$ l complete  
196 IntestiCult™ Organoid Growth Medium containing 100  $\mu\text{g ml}^{-1}$  penicillin/streptomycin  
197 (Invitrogen, USA) to each well. The culture medium was fully exchanged three times per  
198 week. For the treatment, the frozen organoids were passaged two times after thawing.

199 For generation of apical-out organoids, the procedure of reversing the polarity of  
200 organoids was performed according to a previously published protocol by *Co et al. (2021)*.  
201 Briefly, after growing in Matrigel Matrix with growth medium for 7 days, the Matrigel-  
202 embedded organoids were gently dissolved with 500  $\mu$ l cold 5 mM ethylene diamine  
203 tetraacetic acid (EDTA) in D-PBS and transferred to the 15 ml conical tube containing 10 ml  
204 of cold 5 mM EDTA. The tubes were incubated on a rotating platform at  $4^{\circ}$  for 1 h, and then  
205 centrifuged at  $200 \times g$  for 3 min at  $4^{\circ}$ . The organoids were resuspended in complete  
206 IntestiCult™ Organoid Growth Medium containing 100  $\mu\text{g ml}^{-1}$  penicillin/streptomycin and  
207 transferred to ultra-low attachment 24-well plate (3473, Corning, USA). The suspended  
208 organoids were cultured at  $37^{\circ}$  with 5%  $\text{CO}_2$  for 3 days.

209 To induce intestinal damage, the culture medium of basal-out and apical-out organoids  
210 was changed to DMEM/F-12 containing ETEC K88 ( $10^6$  CFU). After the invasion for 1 h, the  
211 organoids were transferred to DMEM/F-12 containing 200  $\mu\text{g ml}^{-1}$  penicillin/streptomycin for  
212 1 h to kill residual extracellular bacteria. Then, the organoids were incubated in DMEM/F-12  
213 containing *A. muciniphila* ( $10^5$  CFU) for 1 h to detect the repair effect of *A. muciniphila*. In  
214 addition, the organoids in WNT-C59 group were pretreated with the Wnt inhibitor Wnt-C59  
215 (100 nM, AdooQ, China) for 24 h prior to damage. After co-cultivation, the organoids were



216 collected and resuspended in 4% paraformaldehyde (PFA, Servicebio, China) at 4°C or  
217 RNAiso Plus (Takara, Japan) at -80°C for further analysis. For epithelial barrier integrity, the  
218 apical-out organoids were resuspended in a solution of 4 kDa fluorescein isothiocyanate-  
219 dextran (FD4) (2 mg ml<sup>-1</sup>) diluted in DMEM/F-12 without phenol red. The design of  
220 organoids' experiment is shown in Figure 1C.

221

### 222 **Real-time quantitative PCR (RT-qPCR) analysis**

223 Total RNA from intestinal tissue and organoids was extracted using TRIzol method  
224 according to the precise instructions and cDNA was synthesized using PrimeScript™ RT  
225 Master Mix (Takara, Japan). With cDNA as template, RT-qPCR was performed using TB  
226 Green® *Premix Ex Taq*™ (Takara, Japan) on a LightCycler 480 System (Roche, Germany).  
227 The real-time primers used in this study are listed in Table S1. The relative mRNA expression  
228 of target genes was statistically analyzed based on the 2<sup>-ΔΔCt</sup> method.

229

### 230 **Bacterial load and intestinal permeability analyses**

231 The bacterial load of ETEC K88 in piglets' jejunal and colonic mucosa was determined  
232 by the absolute quantification. In brief, the gene of ETEC K88 (Genbank Accession:  
233 M25302.1) was amplified by PCR (mK88-F: GGAATGGAAAGTTGGTACAGGTCTT,  
234 mK88-R: CCGGCATAAGATGCATTCACCTTTC), and the PCR product was analyzed by  
235 agarose gel electrophoresis. The specific band was excised and recovered, connected with  
236 pGM-T vector, and transformed into high-efficiency chemoreceptor DH-5α cells. After  
237 culturing, the plasmid DNA was extracted and sequenced. The RT-qPCR analysis was  
238 performed as the description of section 2.5. The copy number of samples was calculated by  
239 the copy number of standard and the standard curve.

240 For the detection of ETEC K88 load in mice, fresh feces, jejunum and colon tissue, liver,  
241 spleen and kidney were homogenized in sterile normal saline using a tissue homogenizer  
242 (Jingxin Industrial Development Co., Ltd., China), then the homogenates were diluted 10-fold  
243 continuously, and the dilutions were plated on MacConkey Agar (Qingdao Hope Bio-

244 Technology Company, China). After incubating in aerobic incubator at 37°C for 24 h, the  
245 plates were counted three times. The results were presented as Lg CFU g<sup>-1</sup> of samples.

246 For intestinal permeability assessment in mice, the serum fluorescence was detected  
247 using a SpectraMax M5 plate reader (Molecular Devices, USA) at a 485 nm excitation  
248 wavelength and a 535 nm emission wavelength. The standard curve was established from the  
249 fluorescence of FD4 at concentrations of 0.005, 0.01, 0.02, 0.04, 0.08, 0.16 0.32, 0.64, 1.28,  
250 2.56, 5.12 and 10.24 µg ml<sup>-1</sup> to calculate the FD4 concentration.

251 For detection of epithelial barrier integrity in organoids, the apical-out organoids in the  
252 FD4 solution were transferred to the slide and instantly imaged live by the laser scanning  
253 confocal microscope IX81-FV1000 (Olympus, Japan) with FV10-ASW software (Olympus,  
254 Japan).

255

## 256 **Histology and morphology analyses**

257 Jejunum and colon tissues were collected, fixed in 4% PFA, dehydrated with gradient  
258 alcohol and embedded in paraffin. The tissue sections were stained with hematoxylin-eosin  
259 (H&E) solution. The indexes related to the morphology of jejunum and colon were measured  
260 by using Image Plus (v6.0). Scanning electron microscopy (SEM) and transmission electron  
261 microscopy (TEM) were performed according to the procedure of the Bio-ultrastructure  
262 Analysis Lab of the Analysis Center of Agrobiolgy and Environmental Sciences, Zhejiang  
263 University. In brief, intestinal tissues were fixed in 2.5% glutaraldehyde, washed with PBS  
264 three times, postfixed with 1% OsO<sub>4</sub> for 1 h, then dehydrated with gradient alcohol (30%,  
265 50%, 70%, 80%, 90%, 95% and 100%) for about 15 min at each step. For SEM, the samples  
266 were dehydrated in Hitachi Model HCP-2 critical point dryer, coated with gold-palladium in  
267 Hitachi Model E-1010 ion sputter, and observed in Hitachi Model SU-8010 SEM. For TEM,  
268 the infiltrated samples were embedded in Spurr resin, sectioned in LEICA EM UC7 ultratome,  
269 and sections were stained by uranyl acetate and alkaline lead citrate, then observed in Hitachi  
270 Model H-7650 TEM.

271

272 **Immunofluorescence analysis**

273 Jejunum tissues were fixed in 4% PFA, dehydrated, paraffin embedded and sectioned.  
274 After antigen retrieval and blocking, the sections were incubated in primary antibodies at 4°C  
275 overnight and secondary antibodies at room temperature for 50 min in the dark, followed by  
276 staining with DAPI at room temperature for 10 min in the dark. The fixed organoids were  
277 incubated in primary antibodies in blocking/permeabilization buffer at room temperature for 4  
278 h, and then incubated in secondary antibodies together with DAPI and phalloidin (Servicebio,  
279 China) in blocking/permeabilization buffer at room temperature for 2 h in the dark. The  
280 fluorescence images were captured using a laser scanning confocal microscope IX81-FV1000  
281 (Olympus, Japan) combined with FV10-ASW software (Olympus, Japan). The information of  
282 primary and secondary antibodies is shown in Table S2.

283

284 **Western blot analysis**

285 Total protein was extracted by radioimmunoprecipitation assay lysis buffer and protein  
286 concentration was determined by a BCA Assay Kit (Thermo Fisher Scientific, USA). Equal  
287 protein amounts (60 µg) were electrophoresed on 10% sodium dodecyl sulphate-  
288 polyacrylamide gel and the separated proteins were transferred onto the polyvinylidene  
289 difluoride membranes (Millipore, USA) The membranes were blocked with Tris-buffered  
290 saline with Tween (TBST) containing 5% BSA for 1 h at room temperature, and incubated  
291 with the primary antibodies (Table S3) in TBST containing 3% BSA overnight at 4°C. After  
292 several times washes in TBST, the membranes were incubated with secondary antibodies  
293 (Table S3) in TBST containing 3% BSA for 1 h at room temperature. The protein bands were  
294 visualized using SuperSignal® West Dura Extended Duration Substrate (Thermo Fisher  
295 Scientific, USA), and quantified by Image J software.

296

297 **Microbiome sequencing analysis**

298 Total DNA was extracted from intestinal contents using the E.Z.N.A.® Stool DNA Kit  
299 (D4015, Omega, Inc., USA) according to the manufacturer's instructions. The quality of DNA

300 was detected by agarose gel electrophoresis, and total DNA was quantified by ultraviolet  
301 spectrophotometer. Specific primers 341 F (5'-CCTACGGGNGGCWGCAG-3') and 805 R  
302 (5'-GACTACHVGGGTATCTAATCC-3') were used for bacterial PCR amplification of 16S  
303 rDNA V3-V4 hypervariable region. The PCR products were purified using AMPure XT beads  
304 (Beckman Coulter Genomics, USA) and quantified by Qubit (Invitrogen, USA). The  
305 amplicon pools were prepared for sequencing and the size and quantity of the amplicon  
306 library were assessed on Agilent 2100 Bioanalyzer (Agilent, USA) and the Library  
307 Quantification Kit for Illumina (Kapa Biosciences, USA), respectively. The libraries were  
308 sequenced on NovaSeq PE250 platform. Samples were sequenced on an Illumina NovaSeq  
309 platform according to the manufacturer's recommendations. Paired-end reads were assigned to  
310 samples based on their unique barcode and truncated by cutting off the barcode and primer  
311 sequence. Paired-end reads were merged using FLASH. Quality filtering on the raw reads  
312 were performed under specific filtering conditions to obtain the high-quality clean tags  
313 according to the fqtrim (v0.94). Chimeric sequences were filtered using Vsearch software  
314 (v2.3.4). After dereplication using DADA2, the Operational Taxonomic Unit (OTU) were  
315 constructed by Amplicon Sequence Variants to obtain the final feature table and feature  
316 sequence. Species annotation of OTU sequences was performed using the Mothur method  
317 with the SSUrRNA database of Silva 132, and multiple sequence alignment was performed  
318 using MUSCLE (v3.8.31) software to obtain the phylogenetic relationships of all OTUs  
319 sequences. The data of each sample were normalized using a standard of sequence number  
320 corresponding to the sample with the least sequences. Subsequent analysis of alpha diversity  
321 and beta diversity were all performed based on the output normalized data. Alpha diversity is  
322 applied in analyzing complexity of species diversity for a sample through 4 indices, including  
323 Chao1, Observed species, Shannon, Simpson, and all these indices in our samples were  
324 calculated with QIIME2. Beta diversity was calculated by QIIME2, and the Anosim, principal  
325 coordinate analysis (PCoA) and non-metric multidimensional scaling (NMDS) analyses were  
326 drawn implemented through R software (v3.5.2) with anosim, WGCNA, stats, ggplot2 and

327 vegan packages. Linear discriminant analysis (LDA) effect size (LEfSe) package was used for  
328 LEfSe analysis. Other diagrams were implemented by using the R software (v3.5.2).

329

### 330 **Quantification of Short chain fatty acids**

331 The colonic contents (50 mg) were homogenized with 0.5 ml dH<sub>2</sub>O in ball mill and then  
332 centrifuged. The supernatant 1 (0.3 ml) was homogenized with 0.5 ml dH<sub>2</sub>O and then  
333 centrifuged. The supernatant 2 (0.5 ml) combined with supernatant 1 were mixed with 0.8 ml  
334 of 2-Methylvaleric acid as internal standard solution and 0.1 ml 50% H<sub>2</sub>SO<sub>4</sub>. After  
335 centrifuging, the supernatant was transferred into fresh glass vial for Gas chromatography-  
336 mass spectrometry analysis, which was performed using an Agilent 7890B gas chromatograph  
337 system coupled with an Agilent 5977B mass spectrometer. Short chain fatty acids (SCFA)  
338 were identified and quantified by the retention time and standard curves of the standard  
339 solutions.

340

### 341 **Flow cytometry (FC) analysis**

342 Intestinal lamina propria cells were isolated by using Mouse Lamina Propria  
343 Dissociation Kit (Miltenyi Biotec, Germany) according to the instruction. For cell surface  
344 staining, the cells were incubated with FC block at 2-8°C for 15 min, then were stained with  
345 Live/Dead Dye (FVS510, BD Pharmingen, USA) at room temperature for 15 min, followed  
346 by washing with Stain Buffer. Cells were incubated with specific fluorescent antibodies  
347 (Table S4) at 2-8°C for 30 min to label immune cells. For intracellular factor staining, cells  
348 were fixed and permeabilized using Transcription Factor Fix/Prem Buffer at 4°C for 40 min,  
349 washed with 1 × Perm/Wash Buffer, and stained with intracellular markers at 4°C for 30 min.  
350 The stained cells were washed and resuspended in PBS, and assessed by the 12-color  
351 FACSCelesta flow cytometer (Becton, Dickinson and Company, USA). The single cells were  
352 first gated on SSC-A vs FSC-A and FSC-A vs FSC-H, and then CD45<sup>+</sup>Live<sup>+</sup> cells were gated  
353 on single cells. The CD45<sup>+</sup>CD3<sup>-</sup> cells were gated on CD45<sup>+</sup>Live<sup>+</sup> cells. The CD4<sup>+</sup> T cells  
354 (CD3<sup>+</sup>CD4<sup>+</sup> cells) were gated on CD45<sup>+</sup>CD3<sup>-</sup> cells, Tregs (CD25<sup>+</sup>Foxp3<sup>+</sup> cells), and Th17

355 cells (CD4<sup>+</sup>ROR $\gamma$ t<sup>+</sup> cells) were gated on CD3<sup>+</sup>CD4<sup>+</sup> cells. The CD86<sup>+</sup>CD11C<sup>+</sup> cells were  
356 gated on DC<sup>+</sup>CD3<sup>-</sup> cells. The data were analyzed using FlowJo software (v10.8.0).

357

### 358 **Isolation and culture of mouse intestinal crypts**

359 The jejunum proximal to the stomach was harvested immediately after mice were  
360 sacrificed. After gently flushing with cold D-PBS (without calcium and magnesium) using  
361 injection syringe, the intestinal segment was opened longitudinally and gently washed with  
362 cold D-PBS three times. Then, the washed intestine was cut into 2 mm pieces with scissors,  
363 which fell into a 50 ml conical tube containing 15 ml cold D-PBS. The rinsing procedure that  
364 using the 10 ml serological pipette to gently pipette the intestinal pieces up and down three  
365 times and then aspirate off the supernatant and add 15 ml fresh cold D-PBS was repeated 10-  
366 15 times until the supernatant was clear. The intestinal pieces were resuspended in 25 ml  
367 Gentle Cell Dissociation Reagent (GCDR, StemCell<sup>TM</sup> Technologies, Canada) and incubated  
368 at room temperature for 15 min on a rocking platform. After incubation, the intestinal pieces  
369 were resuspended in 10 ml cold D-PBS containing 0.1% BSA, supernatant was filtered  
370 through a 70  $\mu$ m filter (Corning, USA), and filtrate was collected and labeled as fraction 1.  
371 Repeat the above step three times to obtain fractions 2-4. The fractions were centrifuged at  
372 290  $\times$  g for 5 min at 4 $\square$  and resuspended in 10 ml cold DMEM/F-12 with 15 mM HEPES.  
373 The quality of the fractions was assessed by using an inverted microscope. The fraction which  
374 enriched for intestinal crypts was selected, centrifuged and resuspended in equal volume of  
375 complete IntestiCult<sup>TM</sup> Organoid Growth Medium (06005, StemCell<sup>TM</sup> Technologies, Canada)  
376 and Matrigel Matrix. The 50  $\mu$ l of the 500-crypt suspension was plated in the center of each  
377 well of the pre-warmed 24-well plate. The plate was placed at 37 $\square$  with 5% CO<sub>2</sub> for 10 min  
378 and then added 750  $\mu$ l complete IntestiCult<sup>TM</sup> Organoid Growth Medium containing 100  $\mu$ g  
379 ml<sup>-1</sup> penicillin/streptomycin to each well. The culture medium was fully exchanged three  
380 times per week. After 7 to 10 days of culture, the organoids were passaged using 1:6 split ratio.  
381 The images of organoids were captured using inverted microscope (Nikon, Japan). The  
382 surface areas of organoids were measured using ImageJ software (v1.8.0). The forming

383 efficiency (%) = (number of mature organoids growing after 5 days / number of crypts seeded)  
384 × 100%.

385

### 386 **Statistical analysis**

387 Data were statistically analyzed by SPSS (v26.0) software, and all data are presented as  
388 means ± standard deviation (SD). *P* value < 0.05 was considered significant. Kolmogorov-  
389 Smirnov test was used to determine whether the data followed the normal distribution.  
390 Comparisons between two groups were executed by unpaired Student's *t*-test or Mann-  
391 Whitney *U*-test, and comparisons among three groups were executed by one-way ANOVA or  
392 Kruskal-Wallis followed by Dunn's multiple comparisons.

393

### 394 **Results**

#### 395 **FMT enhanced the protection of AIMD piglets against ETEC K88 challenge**

396 ETEC K88 infection is a leading cause of diarrhea in humans and animals. We set out to  
397 explore whether FMT protected against ETEC K88 challenge. The piglets were randomly  
398 assigned to three groups: the control piglets (Con group), the ETEC K88 infected piglets (EP  
399 group) and the ETEC K88 infected piglets with FMT treatment (EF group). As shown in  
400 Figure 2A and 2B, decreased ADG and increased diarrhea score were observed in AIMD  
401 piglets at day 3 and day 6 after ETEC K88 infection, and these symptoms were relieved by  
402 FMT treatment. We next detected the pathogen colonization in mucosal tissues and found that  
403 FMT significantly decreased the copies of ETEC K88 in the jejunal and colonic mucosa  
404 (Figure 2C). To address whether FMT could protect intestinal barrier against ETEC K88  
405 infection, intestinal barrier integrity and inflammatory cytokine levels were detected. FMT  
406 decreased the expression of proinflammatory cytokines (*TNF-α*, *IL-1β* and *IL-6*) and  
407 increased levels of anti-inflammatory cytokines (*IL-10* and *TGF-β1*) in the jejunum (*P* < 0.01,  
408 Figure 2D). Jejunal scanning electron microscopy showed that the villi (Figure 3A top) in  
409 ETEC K88 infected piglets were short and coarse, and there existed obvious rod-shaped  
410 bacterial adhesion on the surface of microvilli (Figure 3A bottom), while FMT reversed villi

411 and microvilli injury caused by ETEC K88. In addition, the reduced mRNA and protein levels  
412 of the tight junctions (ZO-1, claudin and occludin) and adheren junctions ( $\beta$ -catenin and E-  
413 cadherin) caused by ETEC K88 challenge were also reversed by FMT treatment in the  
414 jejunum (Figure 3B-C). We then evaluated the expression of Mucin 2 (MUC2) in the jejunum  
415 using immunofluorescence staining. As shown in Figure 3D, ETEC K88 infection reduced the  
416 expression of MUC2, which was significantly increased following FMT administration. These  
417 results indicated that FMT enhanced the protection of AIMD piglets against ETEC K88  
418 challenge.

419

#### 420 ***A. muciniphila* and *B. fragilis* were identified as two key strains in FMT**

421 We next assessed the variation of gut microbiota and SCFA metabolites in ETEC K88-  
422 challenged piglets. The alpha diversity indexes were increased after FMT treatment (Figure  
423 S1A-B). The PCoA and NMDS showed that gut microbiota between two groups clustered  
424 separately (Figure S1C-D). The Anosim analysis ( $R = 0.396$ ,  $P = 0.02$ ) and UPGMA  
425 clustering analysis also indicated that FMT altered the structure of the gut microbiota in  
426 ETEC K88-challenged piglets (Figure 4A-B). LEfSe analysis verified that *B. fragilis* and  
427 *Akkermansia* were changed significantly with an upper 4 LDA score after FMT administration  
428 (Figure 4C). We compared the OTU sequence of *Akkermansia* in the National Center for  
429 Biotechnology Information database by using Blast method based on Best Hit algorithm, and  
430 the result was *A. muciniphila*. Furthermore, FMT significantly increased the production of  
431 SCFA metabolites, including acetic acid, propionic acid, butyric acid, isobutyric acid,  
432 isovaleric acid and hexanoic acid (Figure 4D). These results demonstrated that FMT regulated  
433 gut microbiota and SCFA metabolites in ETEC K88-challenged piglets. *A. muciniphila* and *B.*  
434 *fragilis* were identified as two strains that may play key roles in FMT.

435

#### 436 ***A. muciniphila* and *B. fragilis* maintain intestinal barrier function of ETEC-induced** 437 **mice**



438 We further investigated whether these two strains exerted protective effects on ETEC  
439 infection in AIMD mice model. Mice were randomly assigned to four groups: the control  
440 mice (C group), the ETEC K88 infected mice (E group), the ETEC K88 infected mice treated  
441 with *A. muciniphila* (A group) and the ETEC K88 infected mice treated with *B. fragilis* (B  
442 group). As shown in Figure S2A and 5A, ETEC K88 infection led to weight loss and intestinal  
443 morphology damage, which was relieved by *A. muciniphila* and *B. fragilis* treatment.  
444 Correspondingly, scanning electron microscopy showed that *A. muciniphila* and *B. fragilis*  
445 increased the height and number of microvilli and ameliorated the distribution of intercellular  
446 junction in the jejunum and colon (Figure 5B). In addition, the relative mRNA and protein  
447 expressions of MUC2 were significantly increased in the jejunum of *A. muciniphila* and *B.*  
448 *fragilis* treated mice (Figure 5C). However, only *A. muciniphila* could upregulated MUC2  
449 protein expression in the colon of treated mice (Figure 5C). Furthermore, we investigated the  
450 diffusion of ETEC K88 in feces and organs after infection. ETEC K88 infection surged the  
451 number of *Escherichia coli* in the feces, jejunum, colon, liver, spleen and kidney (Figure S2B).  
452 *A. muciniphila* and *B. fragilis* treatment dramatically decreased the amount of ETEC K88 in  
453 these tissues (Figure S2B), indicating a reduced translocation of ETEC K88 in the tissues and  
454 organs. The concentration of FD4 in the serum has been commonly used as an indicator of  
455 intestinal permeability. As shown in Figure S2C, *A. muciniphila* and *B. fragilis* significantly  
456 decreased serum FD4 concentration, indicating *A. muciniphila* and *B. fragilis* enhanced  
457 intestinal barrier integrity.

458 ETEC K88 adheres to intestinal epithelial cells and induces gut inflammation. As  
459 demonstrated in Figure 6A, ETEC K88 decreased the relative mRNA expression of anti-  
460 inflammatory cytokines *IL-10* and *TGF- $\beta$*  and increased levels of pro-inflammatory cytokines  
461 *TNF- $\alpha$* , *IL-1 $\beta$* , *IL-6* and *IFN- $\gamma$* , which was reversed in A and B groups, indicating that *A.*  
462 *muciniphila* and *B. fragilis* ameliorated ETEC K88-induced intestinal inflammation. Intestinal  
463 inflammatory response is closely related to immune cells. Treg cells secrete anti-inflammatory  
464 cytokines *IL-10* and *TGF- $\beta$*  to alleviate intestinal inflammation. Conversely, Th17 cells  
465 produce pro-inflammatory cytokines, such as *IFN- $\gamma$*  and *IL-17*, which aggravate intestinal

466 inflammation. The dynamic balance of Treg and Th17 cells plays an important role in  
467 intestinal immunity. Therefore, we used flow cytometry to analyze the proportion of the  
468 immune cells isolated from jejunal lamina propria in the innate and adaptive immune system.  
469 Treg cells were labeled with CD25<sup>+</sup>Foxp3<sup>+</sup> cells, Th17 cells were labeled with CD4<sup>+</sup>ROR $\gamma$ t<sup>+</sup>  
470 cells, and mature dendritic cells were labeled with CD86<sup>+</sup>CD11C<sup>+</sup> cells. ETEC K88 infection  
471 significantly decreased the proportion of Treg cells and mature dendritic cells and increased  
472 the proportion of Th17 cells, while oral administration of *A. muciniphila* or *B. fragilis*  
473 significantly reduced the proportion of Th17 cells and increased the proportion of mature  
474 dendritic cells (Figure 6B). Moreover, compared with E group, the proportion of Treg cells in  
475 A group was significantly increased ( $P < 0.01$ ), and the proportion of Treg cells in the B  
476 group had an increasing trend ( $P = 0.59$ ), indicating FMT maintained the proportion of  
477 Treg/Th17 cells in ETEC K88-infected mice.

478

#### 479 ***A. muciniphila* accelerated intestinal epithelial proliferation**

480 Since oral administration of *A. muciniphila* and *B. fragilis* mitigated intestinal mucosal  
481 injury, we set out to explore their effects on the proliferation and differentiation of intestinal  
482 epithelium. ETEC K88 infection prominently decreased *Ki67* and *Lyz* mRNA expression and  
483 the number of Ki67<sup>+</sup> cells and Lyz<sup>+</sup> Paneth cells in the crypt of the jejunum (Figure 7A and  
484 7B). *A. muciniphila* and *B. fragilis* increased *Ki67* and *Lyz* mRNA expression and the number  
485 of Ki67<sup>+</sup> cells. However, only *A. muciniphila* enhanced the number of Lyz<sup>+</sup> Paneth cells,  
486 suggesting that *A. muciniphila* accelerated the proliferation and differentiation of intestinal  
487 epithelial cells. Lgr5-labeled active intestinal stem cells are the driving force of intestinal  
488 epithelial proliferation and differentiation after intestinal injury. ETEC K88 infection  
489 significantly increased the relative mRNA expression of *Lgr5*, *Wnt3*, *Axin2*, *Ctnnb1* in  
490 jejunum mucosa and had no significant impact on *Notch1* and *Hes1* expression (Figure 7C). *A.*  
491 *muciniphila* and *B. fragilis* inhibited the upregulation of *Lgr5*, *Wnt3*, *Axin2* and *Ctnnb1* at  
492 transcriptional level caused by ETEC K88 infection and had no significant effect on *Notch1*  
493 and *Hes1* levels. Western blot analysis also showed that *A. muciniphila* and *B. fragilis*

494 inhibited the upregulation Lgr5, Wnt3, Active  $\beta$ -catenin, c-Myc and CyclinD1 at protein level,  
495 and the effect of *A. muciniphila* was better than that of *B. fragilis* (Figure 7D). These results  
496 implied that *A. muciniphila* regulated the expression of intestinal stem cells in ETEC K88-  
497 challenged mice and regulated Wnt/ $\beta$ -catenin signaling pathway rather than Notch signaling  
498 pathway.

499 We next isolated jejunal crypt from mice and explore whether *A. muciniphila* or *B.*  
500 *fragilis* influenced the ability of intestinal stem cells growing into intestinal organoids *ex vivo*.  
501 In ETEC K88-infected mice, the crypts formed into undifferentiated spherical organoids,  
502 while in *A. muciniphila* or *B. fragilis* treated mice, the crypts generated mature organoids with  
503 bud structure (Figure 8A). We statistically analyzed the surface area and forming efficiency of  
504 the intestinal organoids. As shown in Figure 8B, the organoids derived from ETEC K88-  
505 infected mice had smaller surface area and lower forming efficiency than those from control  
506 mice. *A. muciniphila* treatment led to larger surface area and higher forming efficiency of the  
507 intestinal organoids. The surface area of intestinal organoids in B group was larger than that in  
508 E group, while there was no significant difference in forming efficiency between these two  
509 groups. Meanwhile, the relative mRNA expression of genes related to the proliferation and  
510 differentiation at the intestinal organoid level was consistent with the results of jejunal  
511 mucosa *in vivo* (Figure 8C). These results suggested that *A. muciniphila* accelerated intestinal  
512 epithelial proliferation and regulated Wnt/ $\beta$ -catenin signaling pathway *ex vivo*.

513

#### 514 ***A. muciniphila* protected intestinal organoids against ETEC infection via Wnt signaling**

515 To explore the effects and mechanisms of *A. muciniphila* on ETEC K88 infection *in vitro*,  
516 the porcine intestinal organoids were infected with ETEC K88 (ETEC group), and then co-  
517 cultured with *A. muciniphila* (AKK group). Wnt inhibitor Wnt-C59 was added to explore  
518 whether *A. muciniphila* acted through Wnt/ $\beta$ -catenin signaling pathway (WNT-C59 group),  
519 and porcine intestinal organoids without any treatment were used as blank control (CON  
520 group). The relative mRNA expression of *villin*, *ZO-1*, *Ki67*, *Lyz*, *MUC2*, *Lgr5*, *Wnt3a*,  $\beta$ -  
521 *catenin* and the fluorescence intensity of villin, Ki67, Lgr5, Wnt3a and  $\beta$ -catenin in basal-out

522 intestinal organoids were significantly down-regulated upon ETEC exposure (Figure 9A-G).  
523 *A. muciniphila* upregulated Lgr5, Wnt3a and  $\beta$ -catenin expression in ETEC-infected  
524 organoids, while these effects were inhibited by Wnt-C59 treatment (Figure 9A-G). The  
525 results suggested that *A. muciniphila* increased the number of intestinal stem cells and  
526 activated Wnt signaling, but did not promote the proliferation and differentiation of basal-out  
527 gut organoids. In basal-out intestinal organoid models, the intestinal epithelium was in the  
528 interior of organoid spheroid, which restricted the interaction between intestinal epithelium  
529 and *A. muciniphila*. Therefore, we reversed the polarity of basal-out intestinal organoids by  
530 removing the Matrigel from the culture system and suspending intestinal organoids in the  
531 culture (Figure S3A). In apical-out intestinal organoids, the apical surface was outward to  
532 make it accessible to *A. muciniphila*. Under confocal microscopy, the F-actin of basal-out  
533 intestinal organoid was located in the inside of the spheroids, while the F-actin of the apical-  
534 out intestinal organoid was outside the spheroids, indicating that the polar reversal intestinal  
535 organoid model was successfully constructed (Figure S3B). We conducted FD4 permeation  
536 test in apical-out intestinal organoid model, and co-cultivation with *A. muciniphila* restored  
537 the epithelial barrier integrity of organoids challenged by ETEC K88 (Figure 10A, H). *A.*  
538 *muciniphila* not only increased the mRNA expression of *ZO-1*, *Lyz* and *MUC2* in the ETEC  
539 K88 infected apical-out intestinal organoids, but also up-regulated the protein expression of  
540 villin, Wnt3a,  $\beta$ -catenin and the number of Lgr5<sup>+</sup> and Ki67<sup>+</sup> cells (Figure 10B-G, I). Moreover,  
541 *A. muciniphila* also relieved the inflammatory response of the ETEC K88 infected apical-out  
542 intestinal organoids, as determined by decreasing proinflammatory cytokines, inducing *TNF- $\alpha$* ,  
543 *IL-1 $\beta$* , *IL-6* and *IFN- $\gamma$* , and increasing anti-inflammatory cytokines *IL-10* and *TGF- $\beta$*  (Figure  
544 10J). However, the moderating effect of *A. muciniphila* on the apical-out intestinal organoids  
545 disappeared after Wnt-C59 exposure. Taken together, *A. muciniphila* accelerated the  
546 proliferation and differentiation of the intestinal stem cells and ameliorated the intestinal  
547 barrier injury and inflammation induced by ETEC K88. *A. muciniphila* protected intestinal  
548 organoids against ETEC infection via Wnt signaling.

549

## 550 Discussion

551 The homeostasis of gut microbiota is a major contributor to host health. Intestinal  
552 dysbiosis increases intestinal colonization of antibiotic-resistant and pathogenic bacteria.  
553 Antibiotic treatment is the most drastic exposure leading to gut dysbiosis and pathogen  
554 invasion (*Andremont et al., 2021*). Early-life exposure to antibiotic leads to gut microbiota  
555 dysbiosis and impair host immune system maturation, which may even last for long periods  
556 throughout life (*Nguyen et al., 2020*). Researchers have made a lot of attempts to prevent or  
557 inhibit antibiotic-induced dysbiosis. Our previous study showed that FMT alleviates early-  
558 life antibiotic-induced gut microbiota dysbiosis and mucosa injuries in a neonatal piglet  
559 model (*Ma et al., 2021*). Our present study aimed to investigate whether FMT increases early-  
560 life antibiotic induced neonatal piglet against pathogen invasion. ETEC K88 is one of the  
561 most common pathogens in humans and animals and causes intestinal inflammation and  
562 diarrhea symptoms (*Sun and Kim et al., 2017*). Studies demonstrated that ETEC K88  
563 infection led to pro-inflammatory cytokine upregulation and intestinal mucosal barrier injury  
564 (*Wang et al., 2020; Xie et al., 2021*). In ETEC-induced neonatal piglets, ZO-1 and Claudin-2  
565 levels in ileum of were significantly decreased after ETEC K88 infection (*Xie et al., 2021*). In  
566 accordance with the above results, the present study showed that ETEC K88 infection  
567 increased the expression of pro-inflammatory cytokines and reduced the expression of  
568 intercellular junction proteins in AIMD piglets. Since FMT has been successful in treating  
569 *Clostridioides difficile* infection and maintaining gut barrier, emerging investigation has been  
570 focused on other diseases (*Cammarota et al., 2017*). *Geng et al. (2018)* demonstrated that  
571 FMT diminished the inflammatory response and the destruction of epithelial integrity in  
572 piglets challenged with lipopolysaccharide. In the present study, we found that FMT  
573 dampened ETEC K88-induced pro-inflammatory cytokines upregulation and improved the  
574 intestinal morphology. In addition, the number of ETEC K88 in jejunal and colonic mucosa  
575 was significantly decreased following FMT, which was consistent with the observation of  
576 jejunal microvilli under SEM, showing the absence of rod-shaped bacterial adhesion in FMT  
577 treatment. ETEC infection was reported to reduce the MUC2 expression by destroying goblet

578 cells or directly degrading MUC2, thereby damaging the integrity of the intestinal epithelial  
579 barrier (*Luo et al., 2014*). Our results demonstrated that FMT enhanced the expression of  
580 MUC2 and increased the expression of ZO-1, claudin, occludin,  $\beta$ -catenin and E-cadherin at  
581 mRNA and protein levels, indicating that FMT improved the intercellular junctions between  
582 intestinal epithelial cells and restored the integrity of the intestinal mucosal barrier to reduce  
583 the colonization and invasion of ETEC K88.

584 Intestinal microbiota plays a key role in maintaining gut mucosal barrier and resistance  
585 to pathogen invasion (*Chelakkot et al., 2018*). Antibiotic-induced gut microbiota-disorders  
586 have been reported to disrupt gut barrier and increase the susceptibility of host to pathogenic  
587 microbes (*Wlodarska et al., 2011*). So, we further probed the changes of gut microbiota in  
588 AIMD piglets infected with ETEC K88. The results showed that FMT regulated gut  
589 microbiota and SCFAs metabolism in ETEC K88-challenged piglets. LEfSe analysis  
590 manifested that *B. fragilis* and *A. muciniphila* were the key differential bacteria between three  
591 groups. *A. muciniphila* utilizes mucin as the only carbon and nitrogen source for its growth in  
592 the gut, and its metabolite SCFAs can facilitate MUC2 secretion by goblet cells to maintain  
593 the dynamic balance of intestinal mucus layer (*Ottman et al., 2017*). *A. muciniphila*  
594 negatively correlated with many diseases, including diabetes, obesity and inflammatory bowel  
595 diseases (*Belzer C and de Vos, 2012; Castro-Mejía et al., 2016; Plovier et al., 2017*). It has  
596 been reported that *A. muciniphila* effectively inhibited intestinal inflammatory response and  
597 elevated epithelial barrier function (*Everard et al., 2013; Li et al., 2016; Zhang et al., 2018*).  
598 Meanwhile, *Bacteroides fragilis* is one of the symbiotic anaerobes within the mammalian gut  
599 and is also an opportunistic pathogen which often isolated from clinical specimens (*Sun et al.,*  
600 *2019*). Although it was initially thought to be pathogenic, in the long-term evolution process,  
601 *Bacteroides fragilis* colonized in the gut has established a friendly relationship with the host,  
602 which is an essential component for maintaining the health of the host, especially for obesity,  
603 diabetes and immune deficiency diseases (*Troy and Kasper, 2010*). *B. fragilis* could  
604 decompose mucin by lipid-anchored enzymes and interact with intestinal epithelial cells,  
605 thereby altering intestinal permeability and repairing intestinal epithelial barrier (*Donaldson*

606 *et al.*, 2016; Hsiao *et al.*, 2013). Deng *et al.* (2016) reported that *B. fragilis* altered  
607 macrophage phenotype and increased the phagocytosis of macrophages to restrain pathogens  
608 colonization. Hence, we speculated that FMT increased the relative abundance of *A.*  
609 *muciniphila* and *B. fragilis* in the intestine and alleviate intestinal barrier injury and intestinal  
610 inflammation caused by ETEC K88 infection.

611 Since *A. muciniphila* and *B. fragilis* were identified as two strains that may play key  
612 roles in FMT, we further investigate whether *A. muciniphila* and *B. fragilis* exerted protective  
613 effect on ETEC K88 infection in AIMD mice model. We found that *A. muciniphila* and *B.*  
614 *fragilis* maintained normal gut morphology after ETEC K88 infection, repaired the integrity  
615 of intestinal mucosal barrier as evidenced by the reduced FD4 concentration in serum,  
616 colonized in the intestine and inhibit the translocation of ETEC K88, and reduced the  
617 intestinal inflammation, which may have been attributed to the increased proportion of Treg  
618 cells and mature dendritic cells and the decreased proportion of Th17 cells. These results are  
619 consistent with the protective role of *A. muciniphila* and *B. fragilis* in dextran sulphate sodium  
620 salt induced enteritis model (Bian *et al.*, 2019; Wang *et al.*, 2021; Zhai *et al.*, 2019). Intestinal  
621 stem cell renewal is vital to maintaining the gut barrier. Ki67 is widely expressed in  
622 proliferating cells and presents a reliable indicator of cell proliferation activity (Zheng *et al.*,  
623 2010). Ki67 reaches its peak during the division stage with short half-life period and easy  
624 degradation (Zheng *et al.*, 2010). In our study, *A. muciniphila* and *B. fragilis* increased the  
625 number of Ki67<sup>+</sup> cells and the mRNA expression of *Lyz*, suggesting that *A. muciniphila* and *B.*  
626 *fragilis* accelerated the proliferation and differentiation of intestinal epithelium. Paneth cells  
627 not only produce antimicrobial peptides and express key niche signals that regulate stem cells,  
628 but also secrete activators that dynamically modulate Wnt/ $\beta$ -catenin signaling pathway (Hou  
629 *et al.*, 2020). The Wnt/ $\beta$ -catenin signaling pathway is essential for the proliferation and  
630 differentiation of intestinal stem cells (Ring *et al.*, 2014). When the Wnt receptors are  
631 activated, the multiprotein degradation complex is rapidly inhibited, which allows  $\beta$ -catenin  
632 to accumulate and subsequently migrate to the nucleus and binds to the transcription factors  
633 of T cell factor family and lymphoid enhancer-binding factor family to drive the expression of

634 genes that regulate the stem cells, including Lgr5, c-Myc and Cyclin D1 (Niehrs, 2012). The  
635 c-Myc and Cyclin D1 are cyclins that positively regulate cell cycle from the G1 phase to S  
636 phase, thus inducing cell cycle progression and promote cell proliferation (Shi et al., 2015).  
637 Zhu et al. (2020) reported that *A. muciniphila* restored intestinal mucosal damage with the  
638 accelerated proliferation of intestinal epithelium through Wnt/ $\beta$ -catenin signaling pathway,  
639 thus relieving infection caused by *Salmonella pullorum* in chicks. In the present study, *A.*  
640 *muciniphila* moderately activated Wnt/ $\beta$ -catenin signaling pathway and maintain the suitable  
641 expression of Wnt, Active- $\beta$ -catenin, Lgr5, c-Myc and Cyclin D1. Consistent with the *in vivo*  
642 results, *ex vivo* results of mouse intestinal organoids also demonstrated that *A. muciniphila*  
643 repaired the damaged intestinal epithelium caused by the ETEC K88 infection by modulating  
644 the Wnt/ $\beta$ -catenin signaling pathway. Simultaneously, *B. fragilis* also avoid the overactivation  
645 of the Wnt/ $\beta$ -catenin signaling pathway caused by the ETEC K88 infection, while the impact  
646 of *B. fragilis* was not as obvious as *A. muciniphila*.

647 Intestinal organoid is an ideal model for studying the interaction between intestinal  
648 epithelium and microorganisms *in vitro*, which can eliminate the complexity of animal models  
649 and avoid the unicity of the traditional intestinal epithelial cells (Yin et al., 2019). In order to  
650 further verify whether *A. muciniphila* attenuated ETEC K88 infection through Wnt/ $\beta$ -catenin  
651 signaling pathway, basal-out and apical-out porcine intestinal organoid models was used.  
652 Notably, we found that the ETEC K88 infection down-regulated Wnt/ $\beta$ -catenin signaling  
653 pathway *in vitro*, which was inconsistent with the results *in vivo*. A recent study showed that  
654 the addition of 400 ng ml<sup>-1</sup> STp, an enterotoxin of ETEC, could suppress Wnt/ $\beta$ -catenin  
655 signaling pathway of porcine intestinal organoids (Zhou et al., 2021). It is speculated that the  
656 reason for the difference results might be related to the difference in the processing time of the  
657 *in vivo* and *in vitro* treatment. In spite of the slight stimulation of *A. muciniphila* on the  
658 proliferation and differentiation of infected intestinal organoids, *A. muciniphila* up-regulated  
659 the Wnt/ $\beta$ -catenin signaling pathway and had protective effects on intestinal stem cells. In  
660 basal-out intestinal organoid models, the intestinal epithelium was in the interior of organoid  
661 spheroid, which restricted the interaction between intestinal epithelium and *A. muciniphila*.



662 *Co et al. (2019)* first established the intestinal organoid model with polarity reversal in human  
663 and mouse and evaluated the infection effects of the invasive pathogens with different  
664 polarity-specific patterns, *Salmonella enterica* serovar *Typhimurium* and *Listeria*  
665 *monocytogenes*, on polarity reversal intestinal organoids. Subsequently, *Li et al. (2020)* first  
666 applied the porcine intestinal organoids with polarity reversal to investigate the infectivity and  
667 antiviral immune responses of porcine transmissible gastroenteritis virus. In addition, studies  
668 on host-pathogen interactions using polarity reversal intestinal organoids have also been  
669 reported in the sheep and chickens (). But up to now, there are few reports on the interaction  
670 between host and symbiotic microorganism using polarity reversal intestinal organoids. Here,  
671 we utilized porcine polarity reversal intestinal organoids to make *A. muciniphila* directly  
672 interacting with the intestinal epithelium. Our results showed that *A. muciniphila* alleviated  
673 the injury of polarity reversal intestinal organoids induced by ETEC K88. In agreement with  
674 the *in vivo* results, *A. muciniphila* restrain the intestinal inflammation caused by the ETEC  
675 K88 infection in polarity reversal intestinal organoids. Additionally, the alleviatory effect of *A.*  
676 *muciniphila* on ETEC K88 infection via the Wnt/ $\beta$ -catenin signaling pathway was confirmed  
677 with the addition of Wnt inhibitor Wnt-C59. The promoted proliferation and differentiation in  
678 the basal-out and apical-out intestinal organoids after co-culturing with *A. muciniphila* were  
679 reversed with Wnt-C59.

680 In conclusion, we found that FMT relieved intestinal inflammation and improved  
681 intestinal barrier function in AIMD piglets infected with ETEC K88. *A. muciniphila* was  
682 identified as key strain in FMT to promote the proliferation and differentiation of intestinal  
683 stem cells by mediating the Wnt/ $\beta$  catenin signaling pathway. The study revealed the possible  
684 mechanism that FMT alleviates the intestinal barrier injury.

685

## 686 **DECLARATIONS**

### 687 **Ethics approval and Consent to participate**

688 All animal experiments were performed according to the guidelines of the Animal Care  
689 Committee of Zhejiang University School of Medicine (permit number SYXK 2012-0178).

690 The animal care protocol was approved by the Local Committee of Animal Use following the  
691 Guide for the Care and Use of Laboratory Animals (NIH publication 86-23 revised 1985).

692 **Consent for publication**

693 Not applicable.

694 **Availability of data and material**

695 The raw sequences derived from microbiome analysis for this study can be found in the  
696 Sequence Read Archive (SRA) (<https://www.ncbi.nlm.nih.gov/sra/PRJNA837047>). And all  
697 datasets analyzed in the present study are available from the corresponding author on  
698 reasonable request.

699 **Competing interests**

700 The authors declared that the work was carried out in the absence of any commercial or  
701 financial relationships that could be construed as a potential conflict of interest.

702 **Funding**

703 This research was supported by the National Natural Science Foundation of China (grant  
704 number 32172765).

705 **Acknowledgments**

706 We appreciated the Experimental Teaching Center, College of Animal Science, Zhejiang  
707 University for providing the AW400SG anaerobic workstations.

708

709 **References**

- 710 **An DD**, Oh SF, Olszak T, Neves JF, Avci FY, Erturk-Hasdemir D, Lu X, Zeissig S, Blumberg RS, Kasper  
711 DL. 2014. Sphingolipids from a Symbiotic Microbe Regulate Homeostasis of Host Intestinal Natural  
712 Killer T Cells. *Cell* **156**(1-2):123-133. DOI: <https://doi.org/10.1016/j.cell.2013.11.042>, PMID: 24439373.
- 713 **Andremont A**, Cervesi J, Bandinelli PA, Vitry F, de Gunzburg J. 2021. Spare and repair the gut microbiota  
714 from antibiotic-induced dysbiosis: state-of-the-art. *Drug Discovery Today* **26**(9):2159-2163. DOI:  
715 <https://doi.org/10.1016/j.drudis.2021.02.022>, PMID: 33639249.
- 716 **Belzer C**, de Vos WM. 2012. Microbes inside-from diversity to function: the case of *Akkermansia*. *ISME*  
717 *Journal* **6**(8):1449-1458. DOI: <https://doi.org/10.1038/ismej.2012.6>, PMID: 22437156.
- 718 **Beumer J**, Clevers H. 2021. Cell fate specification and differentiation in the adult mammalian intestine.  
719 *Nature Reviews Molecular Cell Biology* **22**(1):39-53. DOI: <https://doi.org/10.1038/s41580-020-0278-0>,  
720 PMID: 32958874.
- 721 **Bian XY**, Wu WR, Yang LY, Lv LX, Wang Q, Li YT, Ye JZ, Fang DQ, Wu JJ, Jiang XW, Shi D, Li LJ.  
722 2019. Administration of *Akkermansia muciniphila* Ameliorates Dextran Sulfate Sodium-Induced  
723 Ulcerative Colitis in Mice. *Frontiers in Microbiology* **10**:2259. DOI:  
724 <https://doi.org/10.3389/fmicb.2019.02259>, PMID: 31632373.
- 725 **Borody TJ**, Eslick GD, Clancy RL. 2019. Fecal microbiota transplantation as a new therapy: from  
726 *Clostridioides difficile* infection to inflammatory bowel disease, irritable bowel syndrome, and colon  
727 cancer. *Current Opinion in Pharmacology* **49**:43-51. DOI: <https://doi.org/10.1016/j.coph.2019.04.017>,  
728 PMID: 31173991.
- 729 **Buffie CG**, Pamer EG. 2013. Microbiota-mediated colonization resistance against intestinal pathogens.  
730 *Nature Reviews Immunology* **13**(11):790-801. DOI: <https://doi.org/10.1038/nri3535>, PMID: 24096337.
- 731 **Cammarota G**, Ianiro G, Tilg H, Rajilic-Stojanovic M, Kump P, Satokari R, Sokol H, Arkkila P, Pintus C,  
732 Hart A, Segal J, Aloï M, Masucci L, Molinaro A, Scaldaferrì F, Gasbarrini G, Lopez-Sanroman A, Link  
733 A, De Groot P, de Vos WM, Hoegenauer C, Malfertheiner P, Mattila E, Milosavljevic T, Nieuwdorp M,  
734 Sanguinetti M, Simren M, Gasbarrini A. 2017. European consensus conference on faecal microbiota  
735 transplantation in clinical practice. *Gut* **66**(4):569-580. DOI: <https://doi.org/10.1136/gutjnl-2016-313017>,  
736 PMID: 28087657.
- 737 **Canfora EE**, Meex RCR, Venema K, Blaak EE. 2019. Gut microbial metabolites in obesity, NAFLD and  
738 T2DM. *Nature Reviews Endocrinology* **15**(5):261-273. DOI: <https://doi.org/10.1038/s41574-019-0156-z>,  
739 PMID: 30670819.
- 740 **Castro-Mejía J**, Jakešević M, Krych L, Nielsen DS, Hansen LH, Sondergaard BC, Kvist PH, Hansen AK,  
741 Holm TL. 2016. Treatment with a Monoclonal Anti-IL-12p40 Antibody Induces Substantial Gut  
742 Microbiota Changes in an Experimental Colitis Model. *Gastroenterology Research and Practice*  
743 **2016**:4953120. DOI: <https://doi.org/10.1155/2016/4953120>, PMID: 26880890.
- 744 **Chelakkot C**, Ghim J, Ryu SH. 2018. Mechanisms regulating intestinal barrier integrity and its  
745 pathological implications. *Experimental & Molecular Medicine* **50**(8):1-9. DOI:  
746 <https://doi.org/10.1038/s12276-018-0126-x>, PMID: 30115904.
- 747 **Co JY**, Margalef-Català M, Monack DM, Amieva MR. 2021. Controlling the polarity of human  
748 gastrointestinal organoids to investigate epithelial biology and infectious diseases. *Nature Protocols*  
749 **16**(11):5171-5192. DOI: <https://doi.org/10.1038/s41596-021-00607-0>, PMID: 34663962.

- 750 **Co JY**, Margalef-Català M, Li XN, Mah AT, Kuo CJ, Monack DM, Amieva MR. 2019. Controlling  
751 Epithelial Polarity: A Human Enteroid Model for Host-Pathogen Interactions. *Cell Reports* **26**(9):2509-  
752 2520. DOI: <https://doi.org/10.1016/j.celrep.2019.01.108>, PMID: 30811997.
- 753 **Colman RJ**, Rubin DT. 2014. Fecal microbiota transplantation as therapy for inflammatory bowel disease:  
754 A systematic review and meta-analysis. *Journal of Crohns & Colitis* **8**(12):1569-1581. DOI:  
755 <https://doi.org/10.1016/j.crohns.2014.08.006>, PMID: 25223604.
- 756 **Deng HM**, Li ZC, Tan YF, Guo ZB, Liu YY, Wang Y, Yuan Y, Yang RF, Bi YJ, Bai Y, Zhi FC. 2016. A  
757 novel strain of *Bacteroides fragilis* enhances phagocytosis and polarises M1 macrophages. *Scientific*  
758 *Reports* **6**:29401. DOI: <https://doi.org/10.1038/srep29401>, PMID: 27381366.
- 759 **Donaldson GP**, Lee SM, Mazmanian SK. 2016. Gut biogeography of the bacterial microbiota. *Nature*  
760 *Reviews Microbiology* **14**(1):20-32. DOI: <https://doi.org/10.1038/nrmicro3552>, PMID: 26499895.
- 761 **Dubreuil JD**. 2021. Pig vaccination strategies based on enterotoxigenic *Escherichia coli* toxins. *Brazilian*  
762 *Journal of Microbiology* **52**(4):2499-2509. DOI: <https://doi.org/10.1007/s42770-021-00567-3>, PMID:  
763 34244980.
- 764 **Everard A**, Belzer C, Geurts L, Ouwerkerk JP, Druart C, Bindels LB, Guiot Y, Derrien M, Muccioli GG,  
765 Delzenne NM, de Vos WM, Cani PD. 2013. Cross-talk between *Akkermansia muciniphila* and intestinal  
766 epithelium controls diet-induced obesity. *Proceedings of the National Academy of Sciences of the United*  
767 *States of America* **110**(22):9066-9071. DOI: <https://doi.org/10.1073/pnas.1219451110>, PMID: 23671105.
- 768 **Flint H**, Scott KP, Louis P, Duncan SH. 2012. The role of the gut microbiota in nutrition and health. *Nature*  
769 *Reviews Gastroenterology & Hepatology* **9**(10):577-589. DOI: <https://doi.org/10.1038/nrgastro.2012.156>,  
770 PMID: 22945443.
- 771 **Francino MP**. 2016. Antibiotics and the Human Gut Microbiome: Dysbioses and Accumulation of  
772 Resistances. *Frontiers in Microbiology* **6**:1543. DOI: <https://doi.org/10.3389/fmicb.2015.01543>, PMID:  
773 26793178.
- 774 **Geng SJ**, Cheng SS, Li Y, Wen ZS, Ma X, Jiang XM, Wang YZ, Han XY. 2018. Faecal Microbiota  
775 Transplantation Reduces Susceptibility to Epithelial Injury and Modulates Tryptophan Metabolism of the  
776 Microbial Community in a Piglet Model. *Journal of Crohns & Colitis* **12**(11):1359-1374. DOI:  
777 <https://doi.org/10.1093/ecco-jcc/jjy103>, PMID: 30010734.
- 778 **Ghosh S**, Whitley CS, Haribabu B, Jala VR. 2021. Regulation of Intestinal Barrier Function by Microbial  
779 Metabolites. *Cellular and Molecular Gastroenterology and Hepatology* **11**(5):1464-1482. DOI:  
780 <https://doi.org/10.1016/j.jcmgh.2021.02.007>, PMID: 33610769.
- 781 **Hou QH**, Dong YY, Yu QH, Wang B, Le S, Guo YM, Zhang BK. 2020. Regulation of the Paneth cell niche  
782 by exogenous L-arginine couples the intestinal stem cell function. *FASEB Journal* **34**(8): 10299-10315.  
783 DOI: <https://doi.org/10.1096/fj.201902573RR>, PMID: 32725957.
- 784 **Hsiao EY**, McBride SW, Hsien S, Sharon G, Hyde ER, McCue T, Codelli JA, Chow J, Reisman SE,  
785 Petrosino JF, Patterson PH, Mazmanian SK. 2013. Microbiota Modulate Behavioral and Physiological  
786 Abnormalities Associated with Neurodevelopmental Disorders. *Cell* **155**(7):1451-1463. DOI:  
787 <https://doi.org/10.1016/j.cell.2013.11.024>, PMID: 24315484.
- 788 **Li J**, Lin SQ, Vanhoutte PM, Woo CW, Xu AM. 2016. *Akkermansia Muciniphila* Protects Against  
789 Atherosclerosis by Preventing Metabolic Endotoxemia-Induced Inflammation in Apoe<sup>-/-</sup> Mice.  
790 *Circulation* **133**(24):2423-2446. DOI: <https://doi.org/10.1161/CIRCULATIONAHA.115.019645>, PMID:  
791 27143680.

- 792 **Li Y**, Yang N, Chen JN, Huang X, Zhang N, Yang SS, Liu G, Liu GL. 2020. Next-Generation Porcine  
793 Intestinal Organoids: an Apical-Out Organoid Model for Swine Enteric Virus Infection and Immune  
794 Response Investigations. *Journal of Virology* **94**(21):e01006-20. DOI: [https://doi.org/10.1128/JVI.01006-](https://doi.org/10.1128/JVI.01006-20)  
795 [20](https://doi.org/10.1128/JVI.01006-20), PMID: 32796075.
- 796 **Luo HM**, Li MX, Wang F, Yang YF, Wang Q, Zhao YS, Du FK, Chen Y, Shen J, Zhao QY, Zeng JP, Wang  
797 SP, Chen MJ, Li XB, Li WP, Sun YH, Gu L, Wen QL, Xiao ZG, Wu X. 2022. The role of intestinal stem  
798 cell within gut homeostasis: Focusing on its interplay with gut microbiota and the regulating pathways.  
799 *International Journal of Biological Sciences* **18**(13):5185-5206. DOI: <https://doi.org/10.7150/ijbs.72600>,  
800 PMID: 35982910.
- 801 **Luo QW**, Kumar P, Vickers TJ, Sheikh A, Lewis WG, Rasko DA, Sistrunk J, Fleckenstein JM. 2014.  
802 Enterotoxigenic *Escherichia coli* Secretes a Highly Conserved Mucin-Degrading Metalloprotease To  
803 Effectively Engage Intestinal Epithelial Cells. *Infection and Immunity* **82**(2):509-521. DOI:  
804 <https://doi.org/10.1128/IAI.01106-13>, PMID: 24478067.
- 805 **Ma X**, Xu TT, Qian MQ, Zhang YC, Yang ZR, Han XY. 2021. Faecal microbiota transplantation alleviates  
806 early-life antibiotic-induced gut microbiota dysbiosis and mucosa injuries in a neonatal piglet model.  
807 *Microbiological Research* **255**:126942. DOI: <https://doi.org/10.1016/j.micres.2021.126942>, PMID:  
808 34915267.
- 809 **Nash TJ**, Morris KM, Mabbott NA, Vervelde L. 2021. Inside-out chicken enteroids with leukocyte  
810 component as a model to study host-pathogen interactions. *Communications Biology* **4**(1):377. DOI:  
811 <https://doi.org/10.1038/s42003-021-01901-z>, PMID: 33742093.
- 812 **Nguyen LH**, Örtqvist AK, Cao Y, Simon TG, Roelstraete B, Song MY, Joshi AD, Staller K, Chan AT,  
813 Khalili H, Olén O, Ludvigsson JF. 2020. Antibiotic use and the development of inflammatory bowel  
814 disease: a national case-control study in Sweden. *Lancet Gastroenterology & Hepatology* **5**(11):986-995.  
815 DOI: [https://doi.org/10.1016/S2468-1253\(20\)30267-3](https://doi.org/10.1016/S2468-1253(20)30267-3), PMID: 32818437.
- 816 **Niehrs C**. 2012. The complex world of WNT receptor signaling. *Nature Reviews Molecular Cell Biology*  
817 **13**(12):767-779. DOI: <https://doi.org/10.1038/nrm3470>, PMID: 23151663.
- 818 **Ottman N**, Reunanen J, Meijerink M, Pietilä TE, Kainulainen V, Klievink J, Huuskonen L, Aalvink S,  
819 Skurnik M, Boeren S, Satokari R, Mercenier A, Palva A, Smidt H, de Vos WM, Belzer C. 2017. Pili-like  
820 proteins of *Akkermansia muciniphila* modulate host immune responses and gut barrier function. *PLoS*  
821 *One* **12**(3):e0173004. DOI: <https://doi.org/10.1371/journal.pone.0173004>, PMID: 28249045.
- 822 **Plovier H**, Everard A, Druart C, Depommier C, Van Hul M, Geurts L, Chilloux J, Ottman N, Duparc T,  
823 Lichtenstein L, Myridakis A, Delzenne NM, Klievink J, Bhattacharjee A, van der Ark KCH, Aalvink S,  
824 Martinez LO, Dumas ME, Maiter D, Loumaye A, Hermans MP, Thissen JP, Belzer C, de Vos WM, Cani  
825 PD. 2017. A purified membrane protein from *Akkermansia muciniphila* or the pasteurized bacterium  
826 improves metabolism in obese and diabetic mice. *Nature Medicine* **23**(1):107-113. DOI:  
827 <https://doi.org/10.1038/nm.4236>, PMID: 27892954.
- 828 **Quraishi MN**, Widlak M, Bhala N, Moore D, Price M, Sharma N, Iqbal TH. 2017. Systematic review with  
829 meta-analysis: the efficacy of faecal microbiota transplantation for the treatment of recurrent and  
830 refractory *Clostridium difficile* infection. *Alimentary Pharmacology & Therapeutics* **46**(5):479-493. DOI:  
831 <https://doi.org/10.1111/apt.14201>, PMID: 28707337.
- 832 **Ring A**, Kim YM, Kahn M. 2014. Wnt/Catenin Signaling in Adult Stem Cell Physiology and Disease. *Stem*  
833 *Cell Reviews and Reports* **10**(4):512-525. DOI: <https://doi.org/10.1007/s12015-014-9515-2>, PMID:  
834 24825509.

- 835 **Sato T**, Vries RG, Snippert HJ, van de Wetering M, Barker N, Stange DE, van Es JH, Abo A, Kujala P,  
836 Peters PJ, Clevers H. 2009. Single Lgr5 stem cells build crypt-villus structures *in vitro* without a  
837 mesenchymal niche. *Nature* **459**(7244):262-U147. DOI: <https://doi.org/10.1038/nature07935>, PMID:  
838 19329995.
- 839 **Shi Y**, Shu B, Yang RH, Xu YB, Xing BR, Liu J, Chen L, Qi SH, Liu XS, Wang P, Tang JM, Xie JL. 2015.  
840 Wnt and Notch signaling pathway involved in wound healing by targeting *c-Myc* and *Hes1* separately.  
841 *Stem Cell Research & Therapy* **6**:120. DOI: <https://doi.org/10.1186/s13287-015-0103-4>, PMID:  
842 26076648/
- 843 **Smith D**, Price DRG, Burrells A, Faber MN, Hildersley KA, Chintoan-Uta C, Chapuis AF, Stevens M,  
844 Stevenson K, Burgess STG, Innes EA, Nisbet AJ, McNeilly TN. 2021. The Development of Ovine  
845 Gastric and Intestinal Organoids for Studying Ruminant Host-Pathogen Interactions. *Frontiers in*  
846 *Cellular and Infection Microbiology* **11**:733811. DOI: <https://doi.org/10.3389/fcimb.2021.733811>, PMID:  
847 34568096.
- 848 **Sprangers J**, Zaalberg IC, Maurice MM. 2021. Organoid-based modeling of intestinal development,  
849 regeneration, and repair. *Cell Death and Differentiation* **28**(1):95-107. DOI:  
850 <https://doi.org/10.1038/s41418-020-00665-z>, PMID: 33208888.
- 851 **Sun FT**, Zhang QS, Zhao JX, Zhang H, Zhai QX, Chen W. 2019. A potential species of next-generation  
852 probiotics? The dark and light sides of *Bacteroides fragilis* in health. *Food Research International*  
853 **126**:108590. DOI: <https://doi.org/10.1016/j.foodres.2019.108590>, PMID: 31732047.
- 854 **Sun YW**, Kim SW. 2017. Intestinal challenge with enterotoxigenic *Escherichia coli* in pigs, and nutritional  
855 intervention to prevent postweaning diarrhea. *Animal Nutrition* **3**(4):322-330. DOI:  
856 <https://doi.org/10.1016/j.aninu.2017.10.001>, PMID: 29767133.
- 857 **Troy EB**, Kasper DL. 2010. Beneficial effects of *Bacteroides fragilis* polysaccharides on the immune  
858 system. *Frontiers in Bioscience-Landmark* **15**:25-34. DOI: <https://doi.org/10.2741/3603>, PMID:  
859 20036803.
- 860 **Wang C**, Li SJ, Hong K, Yu LL, Tian FW, Zhao JX, Zhang H, Chen W, Zhai QX. 2021. The roles of  
861 different *Bacteroides fragilis* strains in protecting against DSS-induced ulcerative colitis and related  
862 functional genes. *Food & Function* **12**(18):8300-8313. DOI: <https://doi.org/10.1039/d1fo00875g>, PMID:  
863 34308455.
- 864 **Wang WW**, Wang Y, Hao XR, Duan YX, Meng ZQ, An XP, Qi JW. 2020. Dietary fermented soybean meal  
865 replacement alleviates diarrhea in weaned piglets challenged with enterotoxigenic *Escherichia coli* K88  
866 by modulating inflammatory cytokine levels and cecal microbiota composition. *BMC Veterinary*  
867 *Research* **16**(1):245. DOI: <https://doi.org/10.1186/s12917-020-02466-5>, PMID: 32664940.
- 868 **Witkowski M**, Weeks TL, Hazen SL. 2020. Gut Microbiota and Cardiovascular Disease. *Circulation*  
869 *Research* **127**(4):553-570. DOI: <https://doi.org/10.1161/CIRCRESAHA.120.316242>, PMID: 32762536.
- 870 **Wlodarska M**, Willing B, Keeney KM, Menendez A, Bergstrom KS, Gill N, Russell SL, Vallance BA,  
871 Finlay BB. 2011. *Infection and Immunity* **79**(4):1536-1545. DOI: <https://doi.org/10.1128/IAI.01104-10>,  
872 PMID: 21321077.
- 873 **Xie WC**, Song LY, Wang XY, Xu YG, Liu ZS, Zhao DF, Wang SB, Fan XL, Wang ZR, Gao C, Wang XN,  
874 Wang L, Qiao XY, Zhou H, Cui W, Jiang YP, Li YJ, Tang LJ. 2021. A bovine lactoferricin-  
875 lactoferrampin-encoding *Lactobacillus reuteri* CO21 regulates the intestinal mucosal immunity and  
876 enhances the protection of piglets against enterotoxigenic *Escherichia coli* K88 challenge. *Gut Microbes*  
877 **13**(1):1956281. DOI: <https://doi.org/10.1080/19490976.2021.1956281>, PMID: 34369287.

- 878 **Yan KS**, Janda CY, Chang JL, Zheng GXY, Larkin KA, Luca VC, Chia LA, Mah AT, Han A, Terry JM,  
879 Ootani A, Roelf K, Lee M, Yuan J, Li X, Bolen CR, Wilhelmy J, Davies PS, Ueno H, von Furstenberg RJ,  
880 Belgrader P, Ziraldo SB, Ordonez H, Henning SJ, Wong MH, Snyder MP, Weissman IL, Hsueh AJ,  
881 Mikkelsen TS, Garcia KC, Kuo CJ. 2017. Non-equivalence of Wnt and R-spondin ligands during Lgr5<sup>+</sup>  
882 intestinal stem-cell self-renewal. *Nature* **545**(7653):238-242. DOI: <https://doi.org/10.1038/nature22313>,  
883 PMID: 28467820.
- 884 **Yin YB**, Guo SG, Wan D, Wu X, Yin YL. 2019. Enteroids: Promising in Vitro Models for Studies of  
885 Intestinal Physiology and Nutrition in Farm Animals. *Journal of Agricultural and Food Chemistry*  
886 **67**(9):2421-2428. DOI: <https://doi.org/10.1021/acs.jafc.8b06908>, PMID: 30739438.
- 887 **Yu HT**, Ding XL, Shang LJ, Zeng XF, Liu HB, Li N, Huang S, Wang YM, Wang G, Cai S, Chen MX,  
888 Levesque CL, Johnston LJ, Qiao SY. 2018. Protective Ability of Biogenic Antimicrobial Peptide  
889 Microcin J25 Against Enterotoxigenic Escherichia Coli-Induced Intestinal Epithelial Dysfunction and  
890 Inflammatory Responses IPEC-J2 Cells. *Frontiers in Cellular and Infection Microbiology* **8**:242. DOI:  
891 <https://doi.org/10.3389/fcimb.2018.00242>, PMID: 30057893.
- 892 **Zhai R**, Xue XH, Zhang LY, Yang X, Zhao LP, Zhang CH. 2019. Strain-Specific Anti-inflammatory  
893 Properties of Two *Akkermansia muciniphila* Strains on Chronic Colitis in Mice. *Frontiers in Cellular*  
894 *and Infection Microbiology* **9**:239. DOI: <https://doi.org/10.3389/fcimb.2019.00239>, PMID: 31334133.
- 895 **Zhang L**, Qin QQ, Liu MN, Zhang XL, He F, Wang GQ. 2018. *Akkermansia muciniphila* can reduce the  
896 damage of gluco/lipotoxicity, oxidative stress and inflammation, and normalize intestine microbiota in  
897 streptozotocin-induced diabetic rats. *Pathogens and Disease* **76**(4):fty028. DOI:  
898 <https://doi.org/10.1093/femspd/fty028>, PMID: 29668928.
- 899 **Zheng SY**, Li HX, Xu RC, Miao WT, Dai MY, Ding ST, Liu HD. 2021. Potential roles of gut microbiota  
900 and microbial metabolites in Parkinson's disease. *Ageing Research Reviews* **69**:101347. DOI:  
901 <https://doi.org/10.1016/j.arr.2021.101347>, PMID: 33905953.
- 902 **Zheng Y**, Wang L, Zhang JP, Yang JY, Zhao ZM, Zhang XY. 2010. Expression of p53, c-erbB-2 and Ki67  
903 in intestinal metaplasia and gastric carcinoma. *World Journal of Gastroenterology* **16**(3):339-344. DOI:  
904 <https://doi.org/10.3748/wjg.v16.i3.339>, PMID: 20082479.
- 905 **Zhou JY**, Huang DG, Gao CQ, Yan HC, Zou SG, Wang XQ. 2021. Heat-stable enterotoxin inhibits  
906 intestinal stem cell expansion to disrupt the intestinal integrity by downregulating the Wnt/ $\beta$ -catenin  
907 pathway. *Stem Cell* **39**(4):482-496. DOI: <https://doi.org/10.1002/stem.3324>, PMID: 33373490.
- 908 **Zhu LD**, Lu XX, Liu L, Voglmeir J, Zhong X, Yu QH. 2020. *Akkermansia muciniphila* protects intestinal  
909 mucosa from damage caused by *S. pullorum* by initiating proliferation of intestinal epithelium.  
910 *Veterinary Research* **51**(1):34. DOI: <https://doi.org/10.1186/s13567-020-00755-3>, PMID: 32138776.  
911  
912

913 **Figure legends:**

914 **Figure 1. Experimental designs of the present study.** (A) Schematic diagram of the FMT administered to  
915 the AIMD piglets infected with ETEC K88. (B) Schematic diagram of the alleviatory effects of *A.*  
916 *muciniphila* and *B. fragilis* on ETEC K88 infection in mice. (C) Schematic diagram of the alleviatory  
917 effects of *A. muciniphila* on ETEC K88 infection in porcine basal-out and apical-out intestinal organoids.

918 **Figure 2. FMT improved the growth performance and inflammatory response of AIMD piglets**  
919 **infected with ETEC K88.** (A) Average daily weight gain (ADG) in the Con, EP and EF groups. (B)  
920 Diarrhea score at days 3 and 6 post-infection. (C) The colonization of ETEC K88 in the jejunum and colon.  
921 The melting curve demonstrated that only the ETEC K88 could be amplified by the primers we used. (D)  
922 The relative mRNA expression of cytokines in the jejunum. Con: control group, EP: ETEC K88 + PBS  
923 group, EF: ETEC K88 + FMT group. Data are expressed as the mean  $\pm$  SD. \*,  $P < 0.05$ , \*\*,  $P < 0.01$ , \*\*\*,  
924  $P < 0.001$ .

925 **Figure 3. FMT improved the intestinal morphology and barrier function in AIMD piglets infected**  
926 **with ETEC K88.** (A) SEM images of villi (top) and microvilli (bottom) in the jejunum (scale bars = 300 or  
927 2  $\mu$ m). (B) The relative mRNA expression of tight junction proteins (ZO-1, claudin and occludin) and  
928 adheren junctions ( $\beta$ -catenin and E-cadherin) in the jejunum. (C) The relative protein expression of tight  
929 junction proteins (ZO-1, claudin and occludin) and adheren junction proteins ( $\beta$ -catenin and E-cadherin)  
930 in the jejunum. (D) Immunofluorescence images of Mucin 2 (MUC2, green) in the jejunum (scale bars = 50  
931  $\mu$ m). Con: control group, EP: ETEC K88 + PBS group, EF: ETEC K88 + FMT group. Data are expressed  
932 as the mean  $\pm$  SD. \*,  $P < 0.05$ , \*\*,  $P < 0.01$ . Data shown are representative of at least two independent  
933 experiments.

934 **Figure 4. FMT changed the composition of gut microbiota and the concentration of SCFAs in AIMD**  
935 **piglets infected with ETEC K88.** (A) Anosim analysis. (B) UPGMA clustering analysis based on  
936 Unweighted unifracc distance. (C) LEfSe analysis with LDA score  $> 4$ . (D) Quantification of SCFA  
937 metabolites (acetic acid, propionic acid, butyric acid, isobutyric acid, isovaleric acid and hexanoic acid). EP:  
938 ETEC K88 + PBS group, EF: ETEC K88 + FMT group. Data are expressed as the mean  $\pm$  SD. \*,  $P < 0.05$ ,  
939 \*\*,  $P < 0.01$ . Data shown are representative of at least two independent experiments.

940 **Figure 5. *A. muciniphila* and *B. fragilis* improved the intestinal morphology of mice infected with**  
941 **ETEC K88.** (A) H&E-stained images of jejunum (scale bars = 50  $\mu$ m) and the histograms of villus height,  
942 crypt depth and the ratio of villus height to crypt depth. (B) TEM images of jejunum and colon (scale bars  
943 = 0.5  $\mu$ m). (C) Immunofluorescence images of Mucin 2 (MUC2, green) in the jejunum and colon (scale  
944 bars = 50  $\mu$ m). C: control group, E: ETEC K88 + PBS group, A: ETEC K88 + *A. muciniphila* group, B:  
945 ETEC K88 + *B. fragilis* group. Data are expressed as the mean  $\pm$  SD. \*,  $P < 0.05$ , \*\*,  $P < 0.01$ , \*\*\*,  $P <$   
946 0.001. Data shown are representative of at least two independent experiments.

947 **Figure 6. *A. muciniphila* and *B. fragilis* regulated the expression of inflammatory cytokines and the**  
948 **balance of Treg and Th17 cells in mice infected with ETEC K88.** (A) The relative mRNA expression of  
949 cytokines in the jejunum. (B) Flow cytometric dot plots and proportions of Treg (CD25<sup>+</sup>Foxp3<sup>+</sup>), Th17  
950 (CD4<sup>+</sup>ROR $\gamma$ t<sup>+</sup>) and mature dendritic cells (CD86<sup>+</sup>CD11C<sup>+</sup>) in jejunal lamina propria. C: control group, E:  
951 ETEC K88 + PBS group, A: ETEC K88 + *A. muciniphila* group, B: ETEC K88 + *B. fragilis* group. Data  
952 are expressed as the mean  $\pm$  SD. \*,  $P < 0.05$ , \*\*,  $P < 0.01$ , \*\*\*,  $P < 0.001$ . Data shown are representative of  
953 at least two independent experiments.

954 **Figure 7. *A. muciniphila* and *B. fragilis* enhanced the number of Ki67 cells and Lyz Paneth cells in**  
955 **jejunal crypt of mice infected with ETEC K88 by moderately activating the Wnt/ $\beta$ -catenin pathway.**



956 (A) The mRNA expression and immunofluorescence staining images of intestinal epithelial cell  
957 proliferation marker Ki67 (red). (B) The mRNA expression and immunofluorescence staining images of  
958 Paneth marker Lyz (green). (C) The relative mRNA expression of *Lgr5*, *Wnt3*, *Notch1* and other genes in  
959 jejunum mucosa. (D) The relative protein expression of Wnt/ $\beta$ -catenin pathway and its target genes in  
960 jejunum mucosa. C: control group, E: ETEC K88 + PBS group, A: ETEC K88 + *A. muciniphila* group, B:  
961 ETEC K88 + *B. fragilis* group. Data are expressed as the mean  $\pm$  SD. \*,  $P < 0.05$ , \*\*,  $P < 0.01$ , \*\*\*,  $P <$   
962 0.001. Data shown are representative of at least two independent experiments.

963 **Figure 8. *A. muciniphila* and *B. fragilis* promoted the activity of  $Lgr5^+$  intestinal stem cells as proved**  
964 **by the growth of intestinal organoids.** (A) Morphology of *ex vivo* culture of crypts isolated from the  
965 jejunum of mice in the C, E, A and B groups (Day 5; 4  $\times$ , scale bars = 200  $\mu$ m; 20  $\times$ , scale bars = 50  $\mu$ m).  
966 (B) The surface area and forming efficiency of intestinal organoids. (C) The relative mRNA expression of  
967 genes related to the proliferation and differentiation of the intestinal organoids. C: control group, E: ETEC  
968 K88 + PBS group, A: ETEC K88 + *A. muciniphila* group, B: ETEC K88 + *B. fragilis* group. Data are  
969 expressed as the mean  $\pm$  SD. \*,  $P < 0.05$ , \*\*,  $P < 0.01$ , \*\*\*,  $P < 0.001$ . Data shown are representative of at  
970 least two independent experiments.

971 **Figure 9. *A. muciniphila* protected the  $Lgr5^+$  intestinal stem cell and activated the Wnt/ $\beta$ -catenin**  
972 **signaling pathway of the ETEC K88-induced basal-out intestinal organoids.** (A) The relative mRNA  
973 expression of *villin*, *ZO-1*, *Ki67*, *Lyz1*, *MUC2*, *Lgr5*, *Wnt3a* and  *$\beta$ -catenin* genes. (B)-(F)  
974 Immunofluorescence images of villin (scale bars = 50  $\mu$ m), Ki67 (scale bars = 50  $\mu$ m), *Lgr5* (scale bars =  
975 20  $\mu$ m), *Wnt3a* (scale bars = 50  $\mu$ m) and  *$\beta$ -catenin* (scale bars = 50  $\mu$ m). (G) Fold change of the mean  
976 fluorescence intensity. CON: control group, ETEC: ETEC K88 + DMEM/F-12 group, AKK: ETEC K88 +  
977 *A. muciniphila* group, WNT-C59: Wnt-C59 + ETEC K88 + *A. muciniphila* group. Data are expressed as the  
978 mean  $\pm$  SD. \*,  $P < 0.05$ , \*\*,  $P < 0.01$ , \*\*\*,  $P < 0.001$ . Data shown are representative of at least two  
979 independent experiments.

980 **Figure 10. *A. muciniphila* alleviated the intestinal epithelial injury of the ETEC K88-induced apical-**  
981 **out intestinal organoids.** (A) Confocal microscope visualization of the apical-out intestinal organoids  
982 incubated in FD4 solution (scale bars = 50  $\mu$ m). (B) The relative mRNA expression of *villin*, *ZO-1*, *Ki67*,  
983 *Lyz1*, *MUC2*, *Lgr5*, *Wnt3a* and  *$\beta$ -catenin* genes. (C)-(G) Immunofluorescence images of villin, Ki67, *Lgr5*,  
984 *Wnt3a* and  *$\beta$ -catenin* (scale bars = 20  $\mu$ m). (H) Quantification of the apical-out intestinal organoids  
985 incubated in FD4 solution that have intact barrier integrity. (I) Fold change of the mean fluorescence  
986 intensity. (J) The relative mRNA expression of cytokines in the apical-out intestinal organoids. CON:  
987 control group, ETEC: ETEC K88 + DMEM/F-12 group, AKK: ETEC K88 + *A. muciniphila* group, WNT-  
988 C59: Wnt-C59 + ETEC K88 + *A. muciniphila* group. Data are expressed as the mean  $\pm$  SD. \*,  $P < 0.05$ , \*\*,  
989  $P < 0.01$ , \*\*\*,  $P < 0.001$ . Data shown are representative of at least two independent experiments.

990



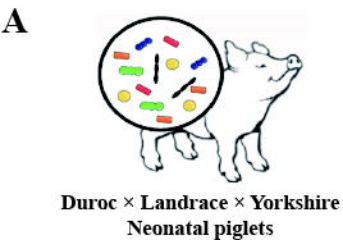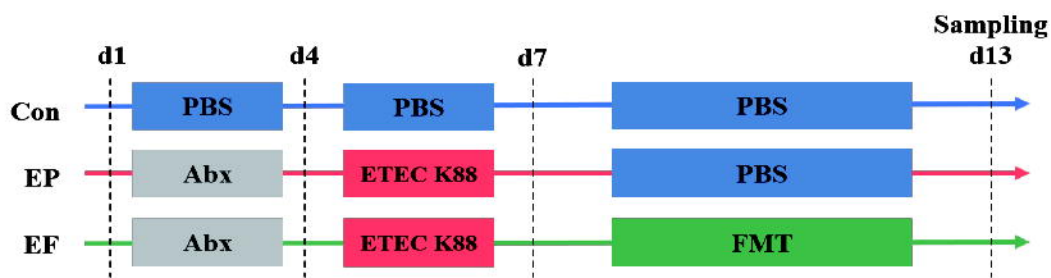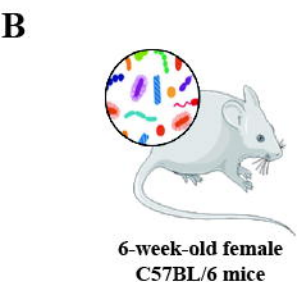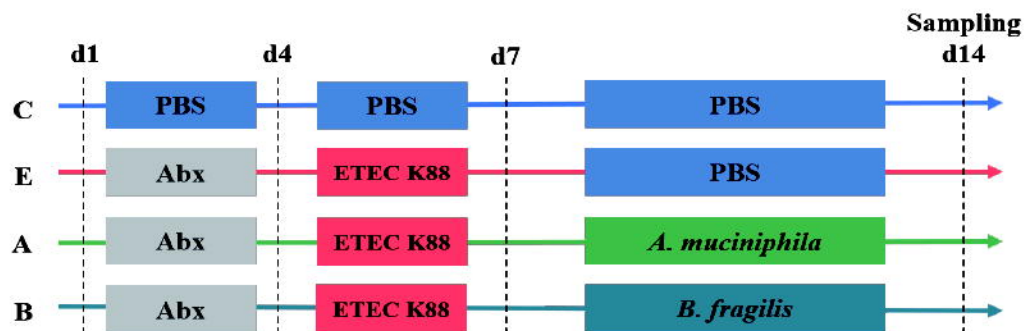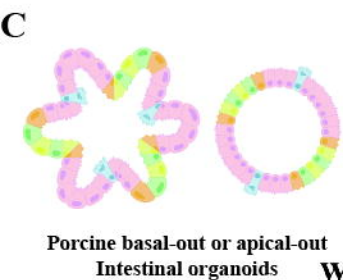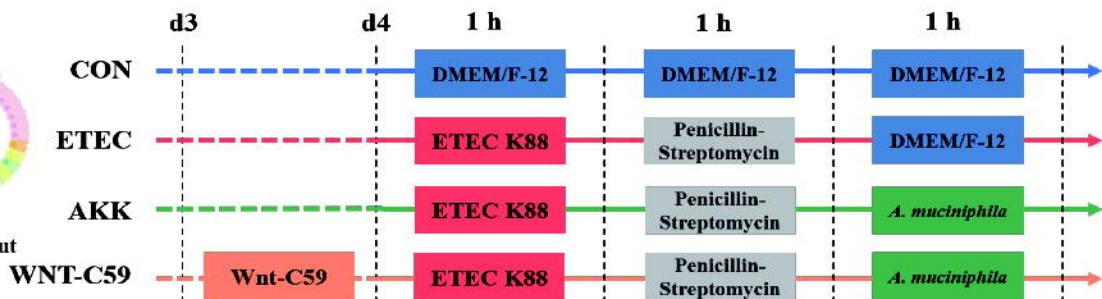

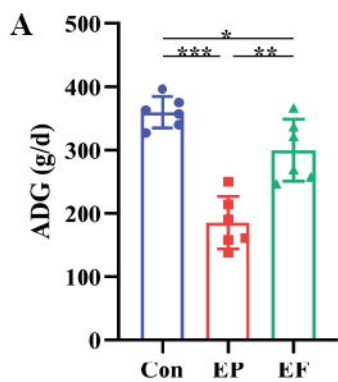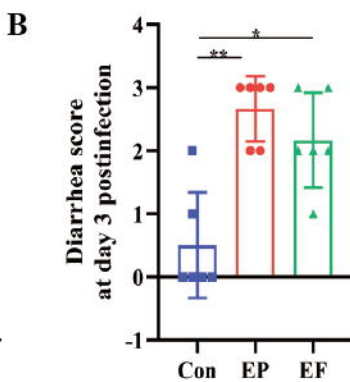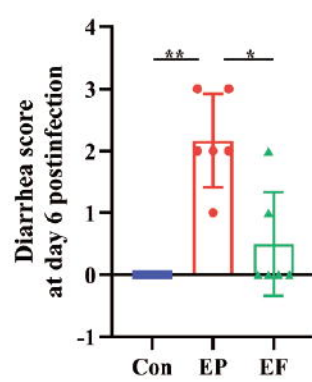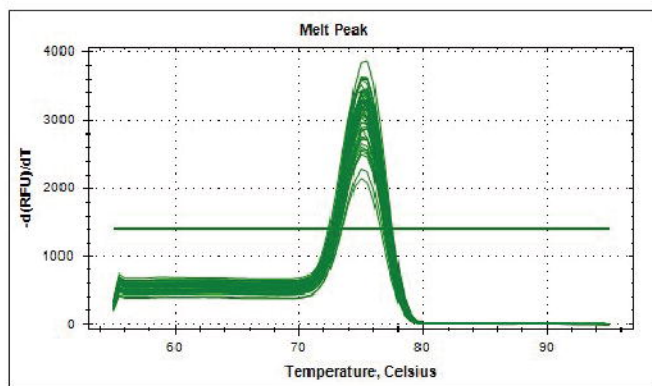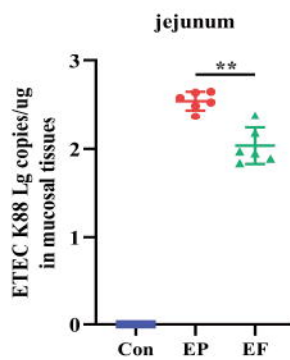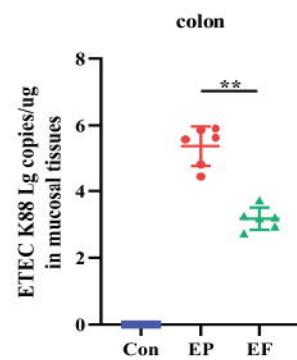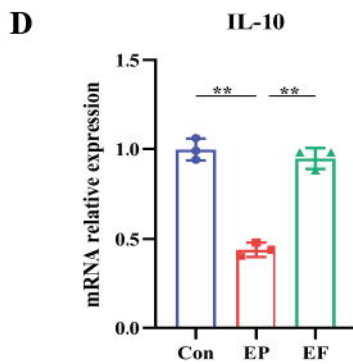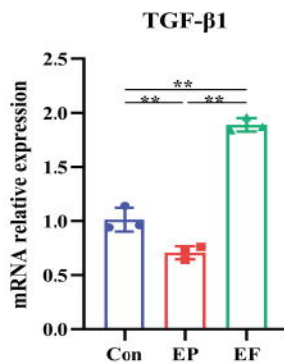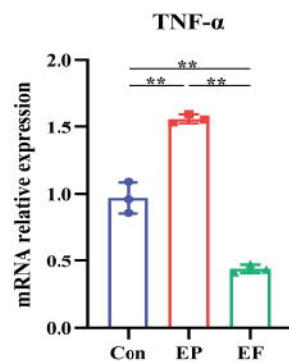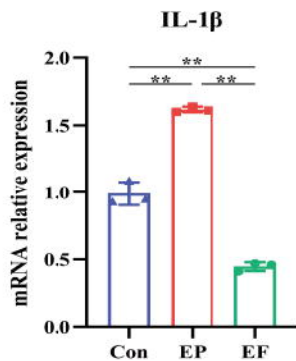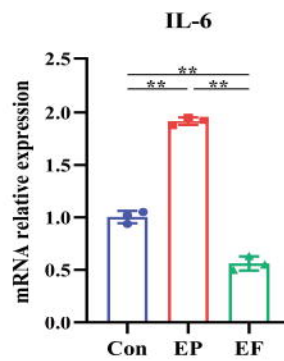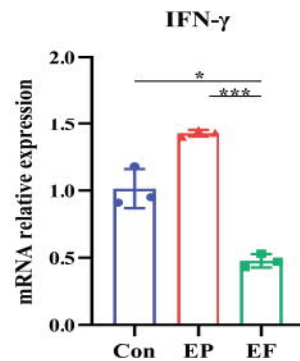

A

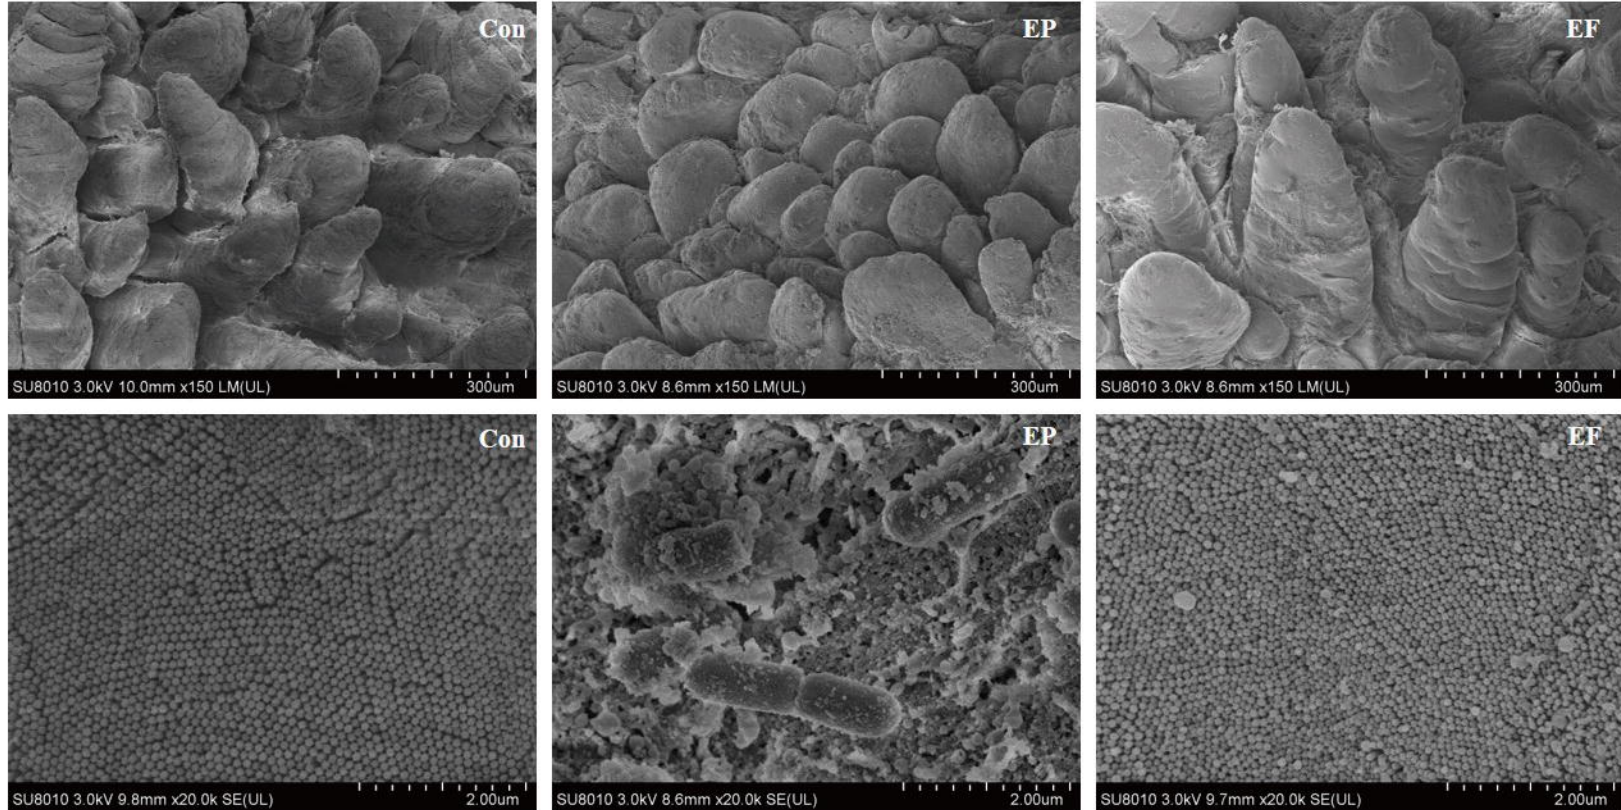

B

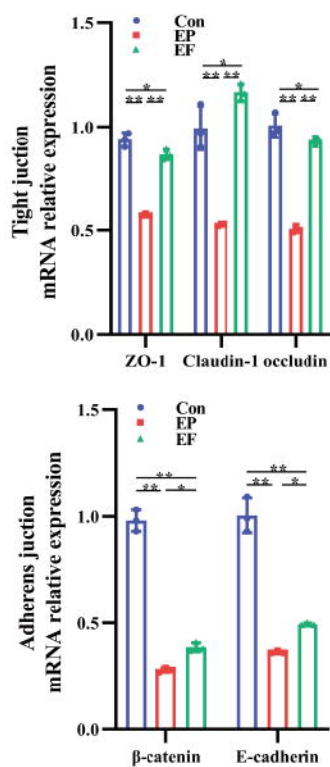

C

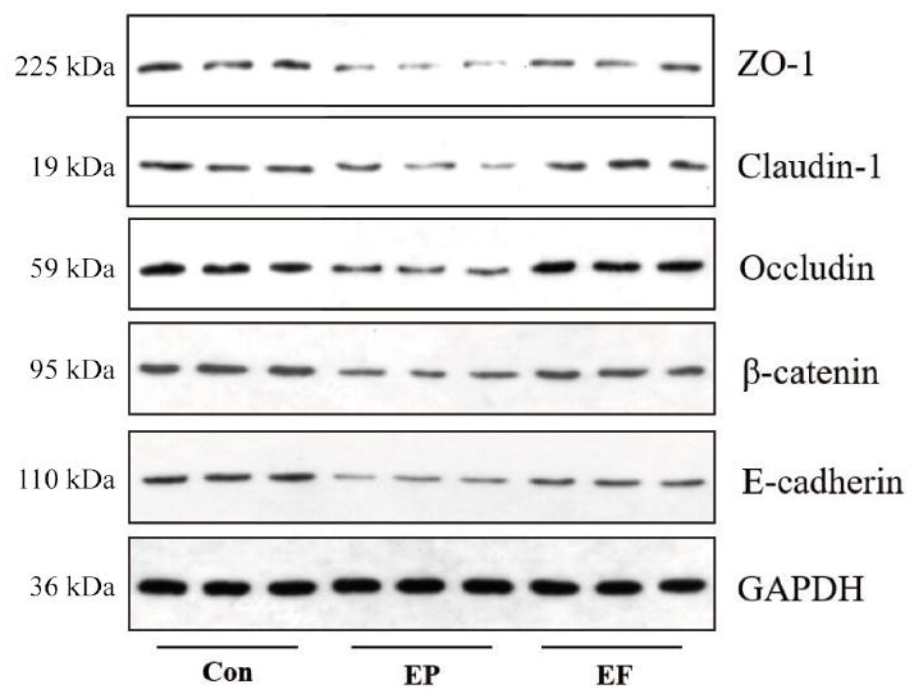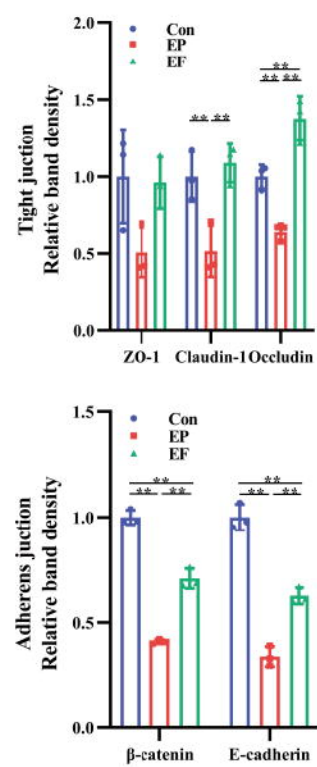

D

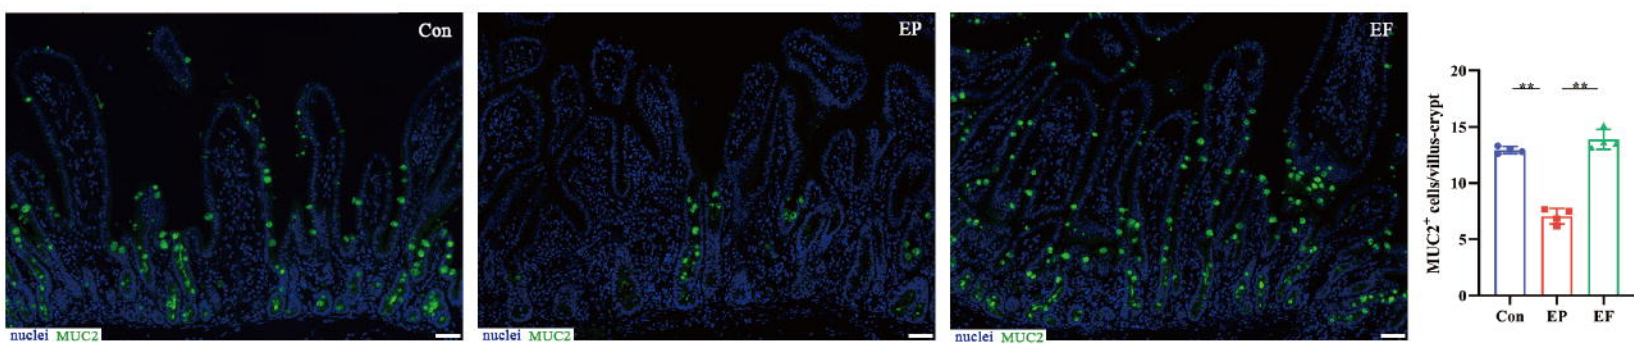

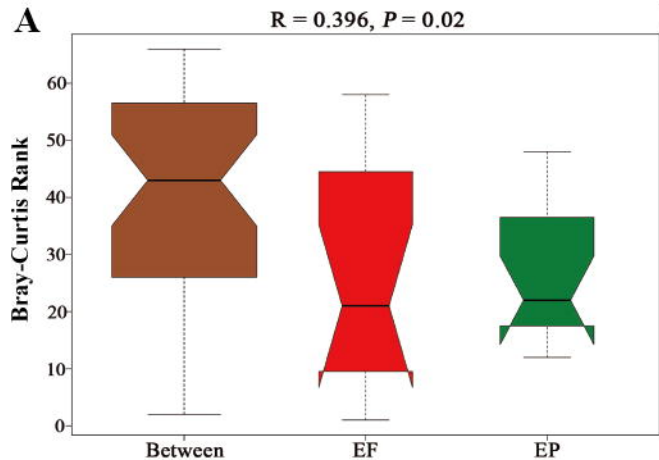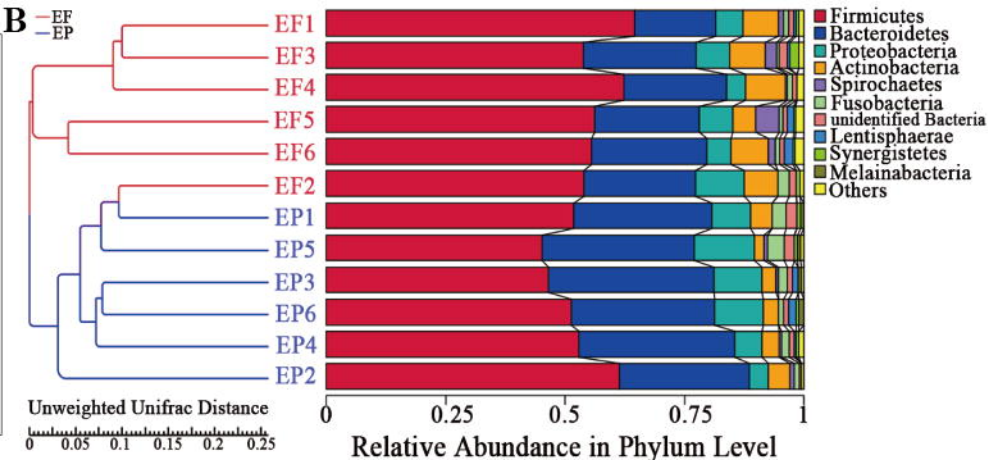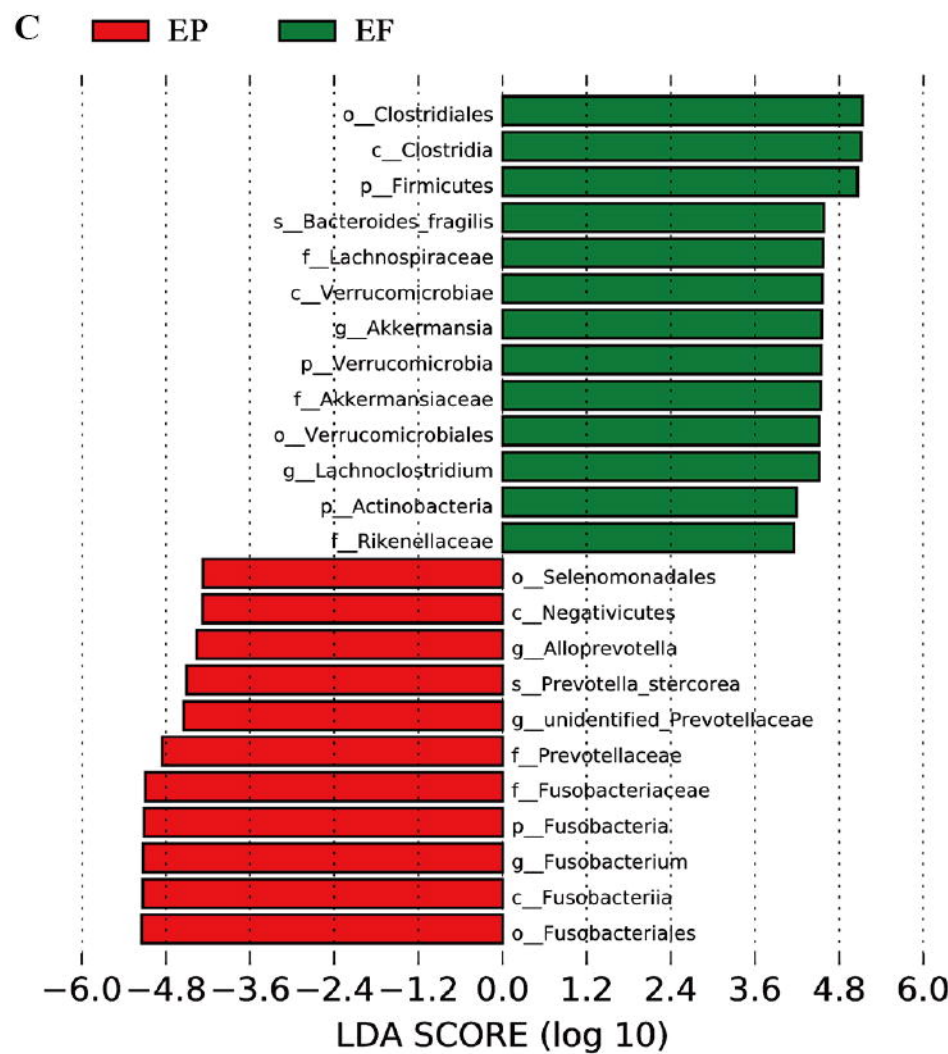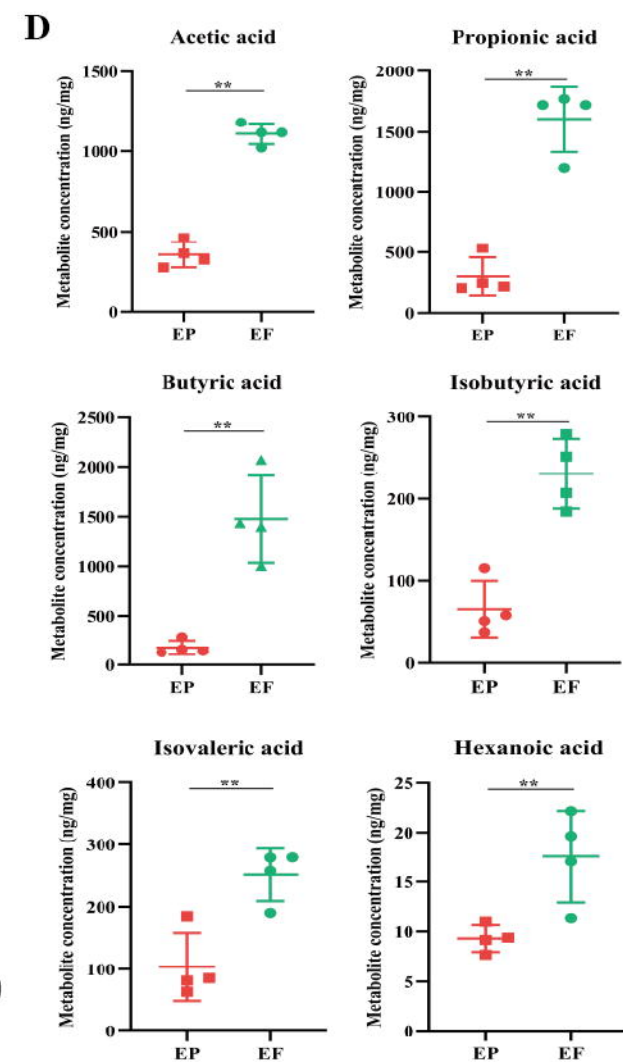

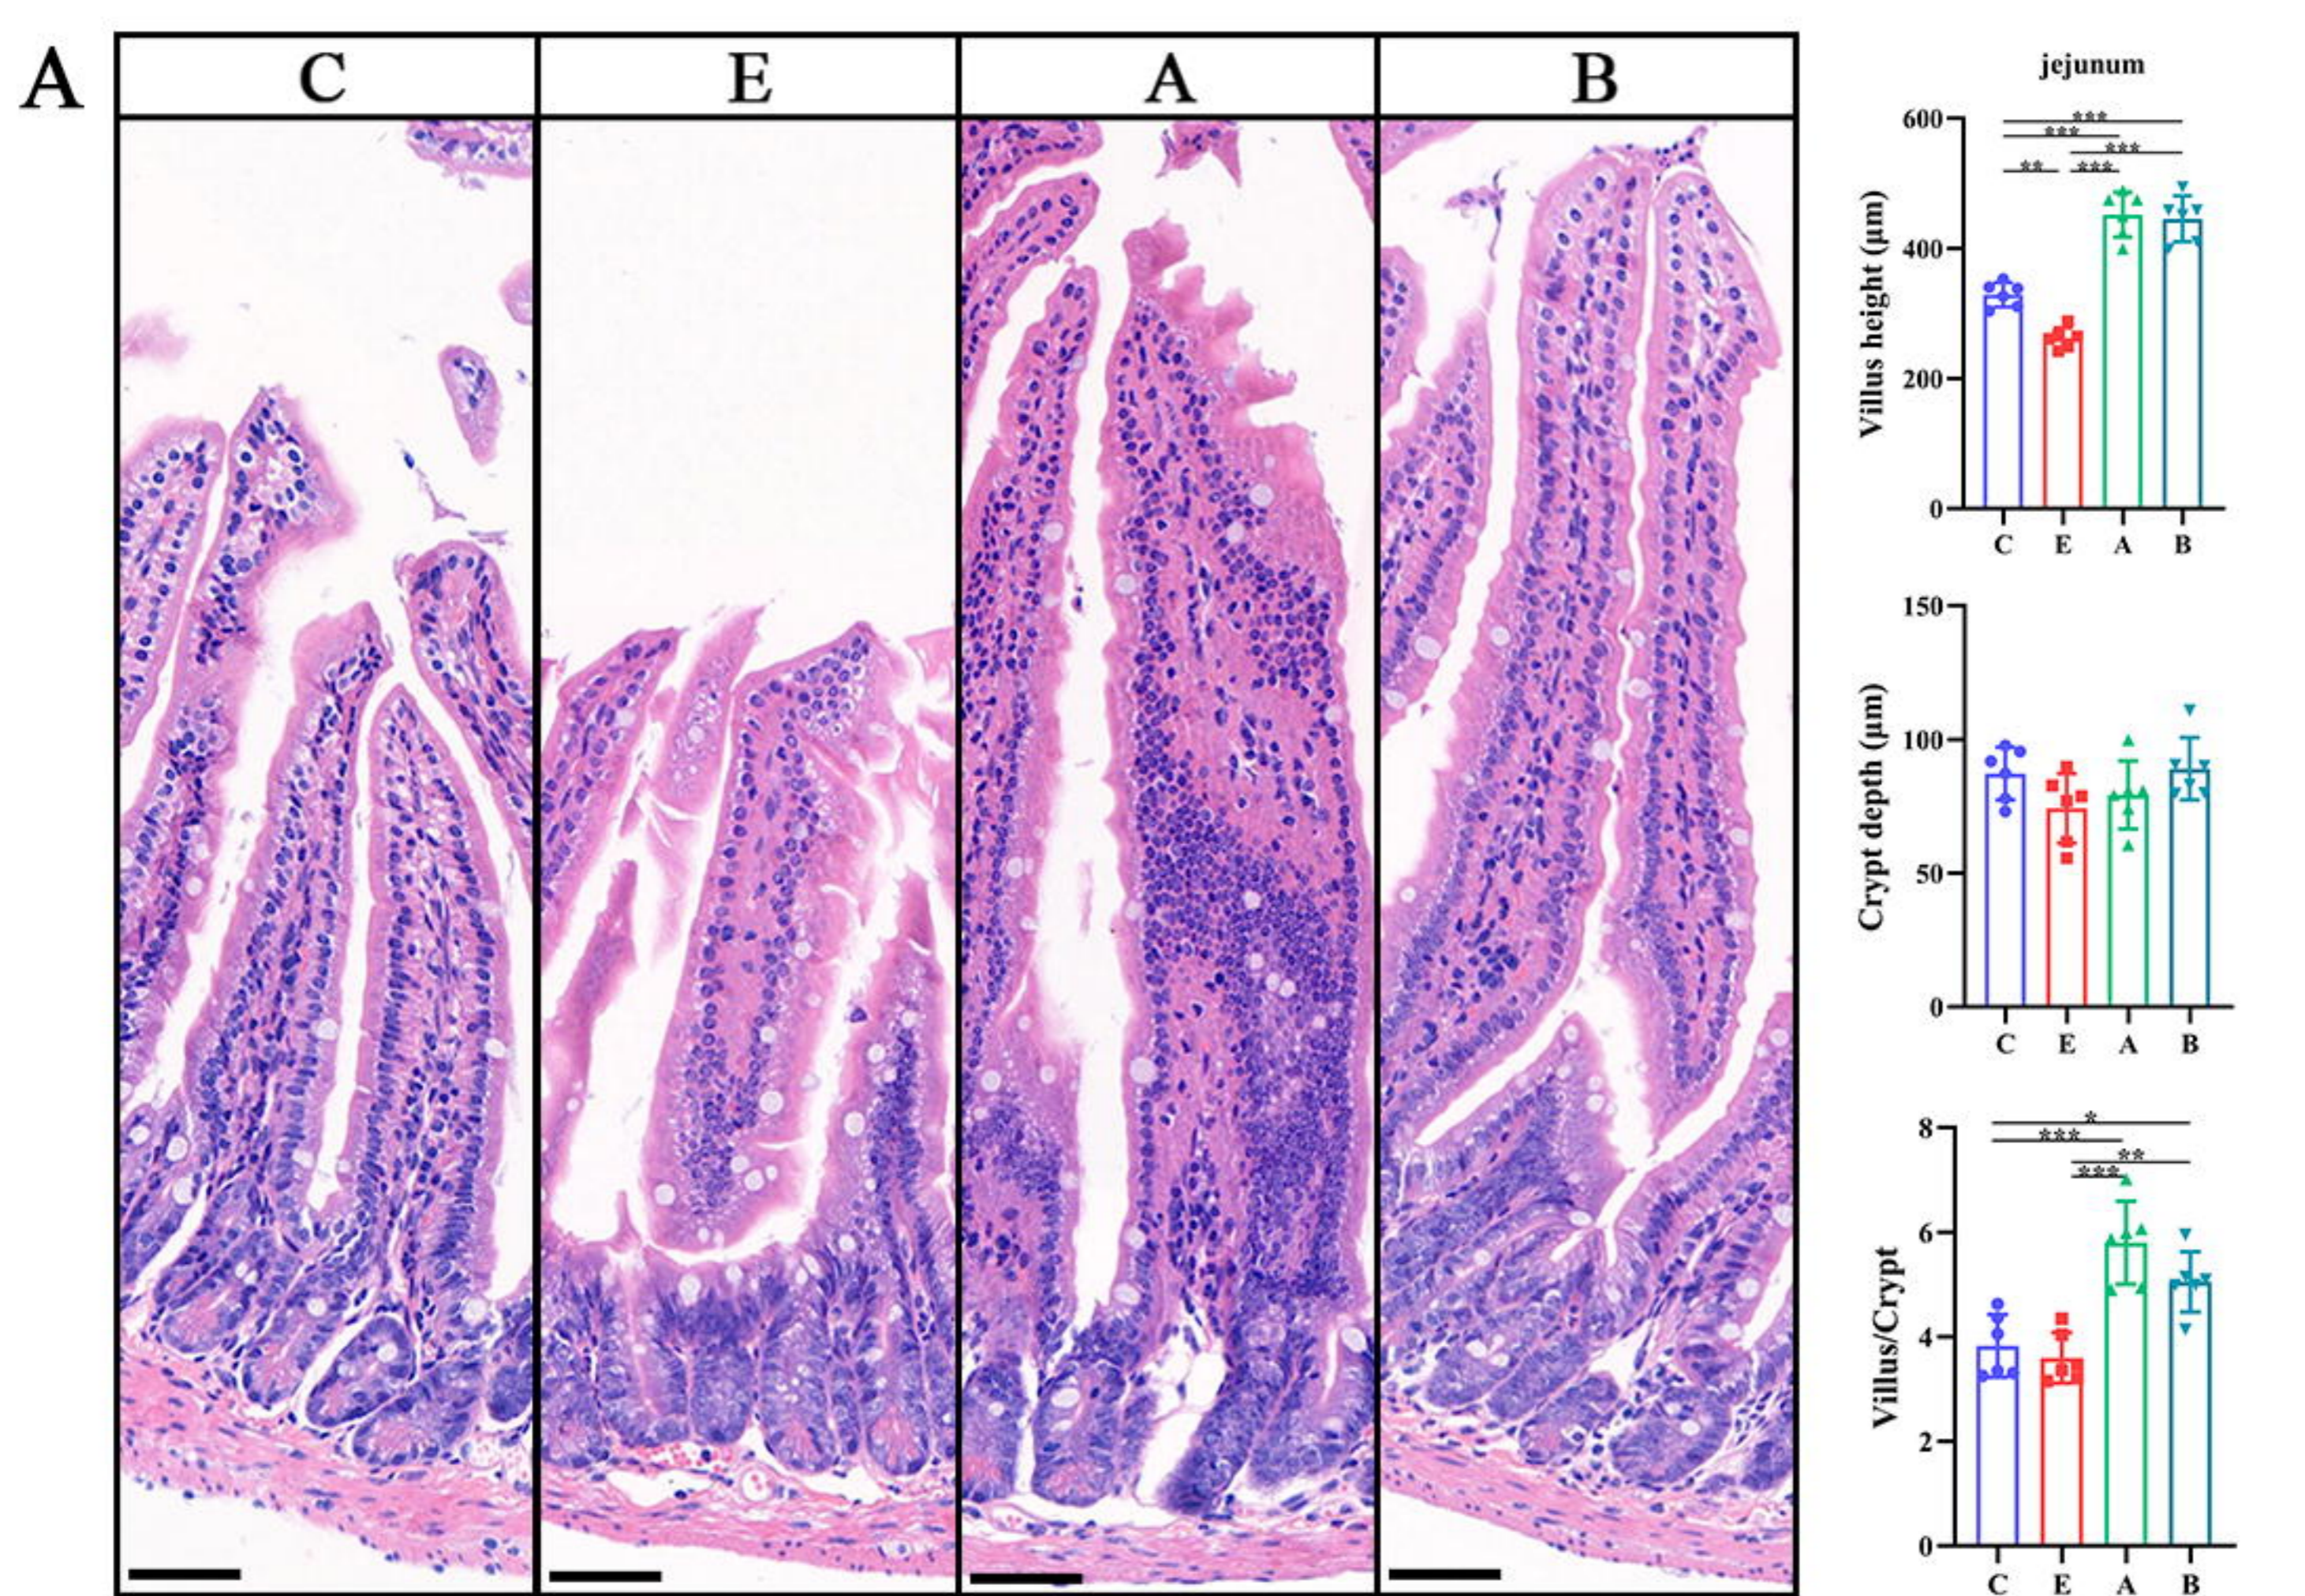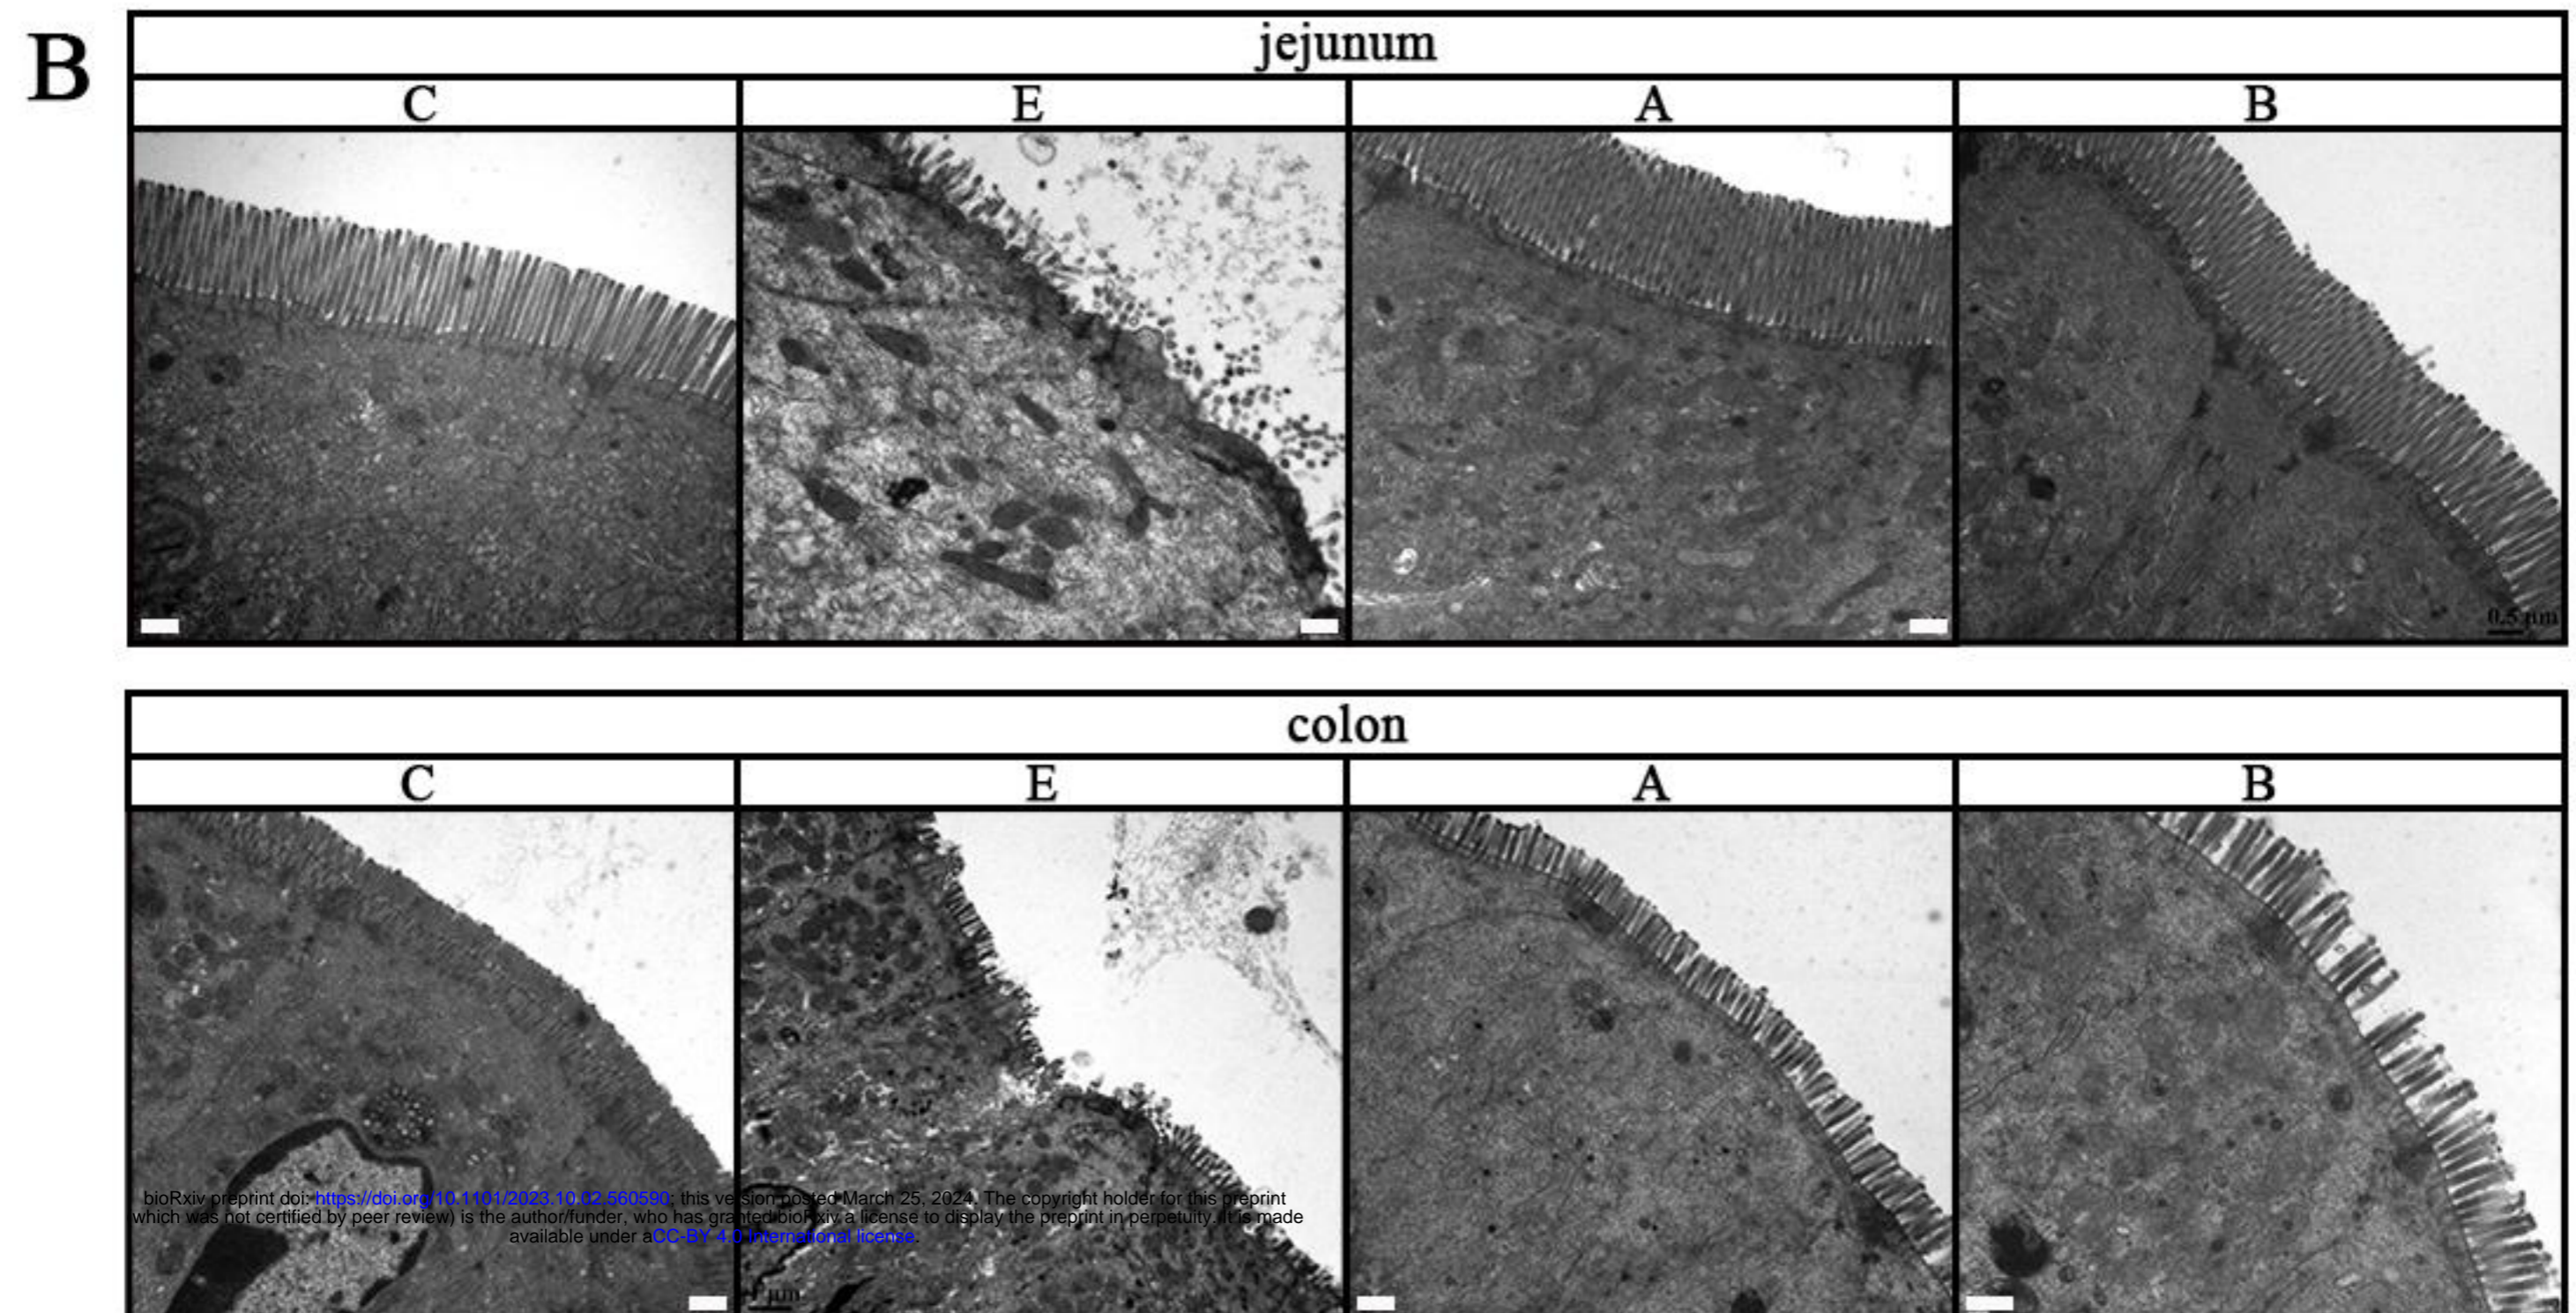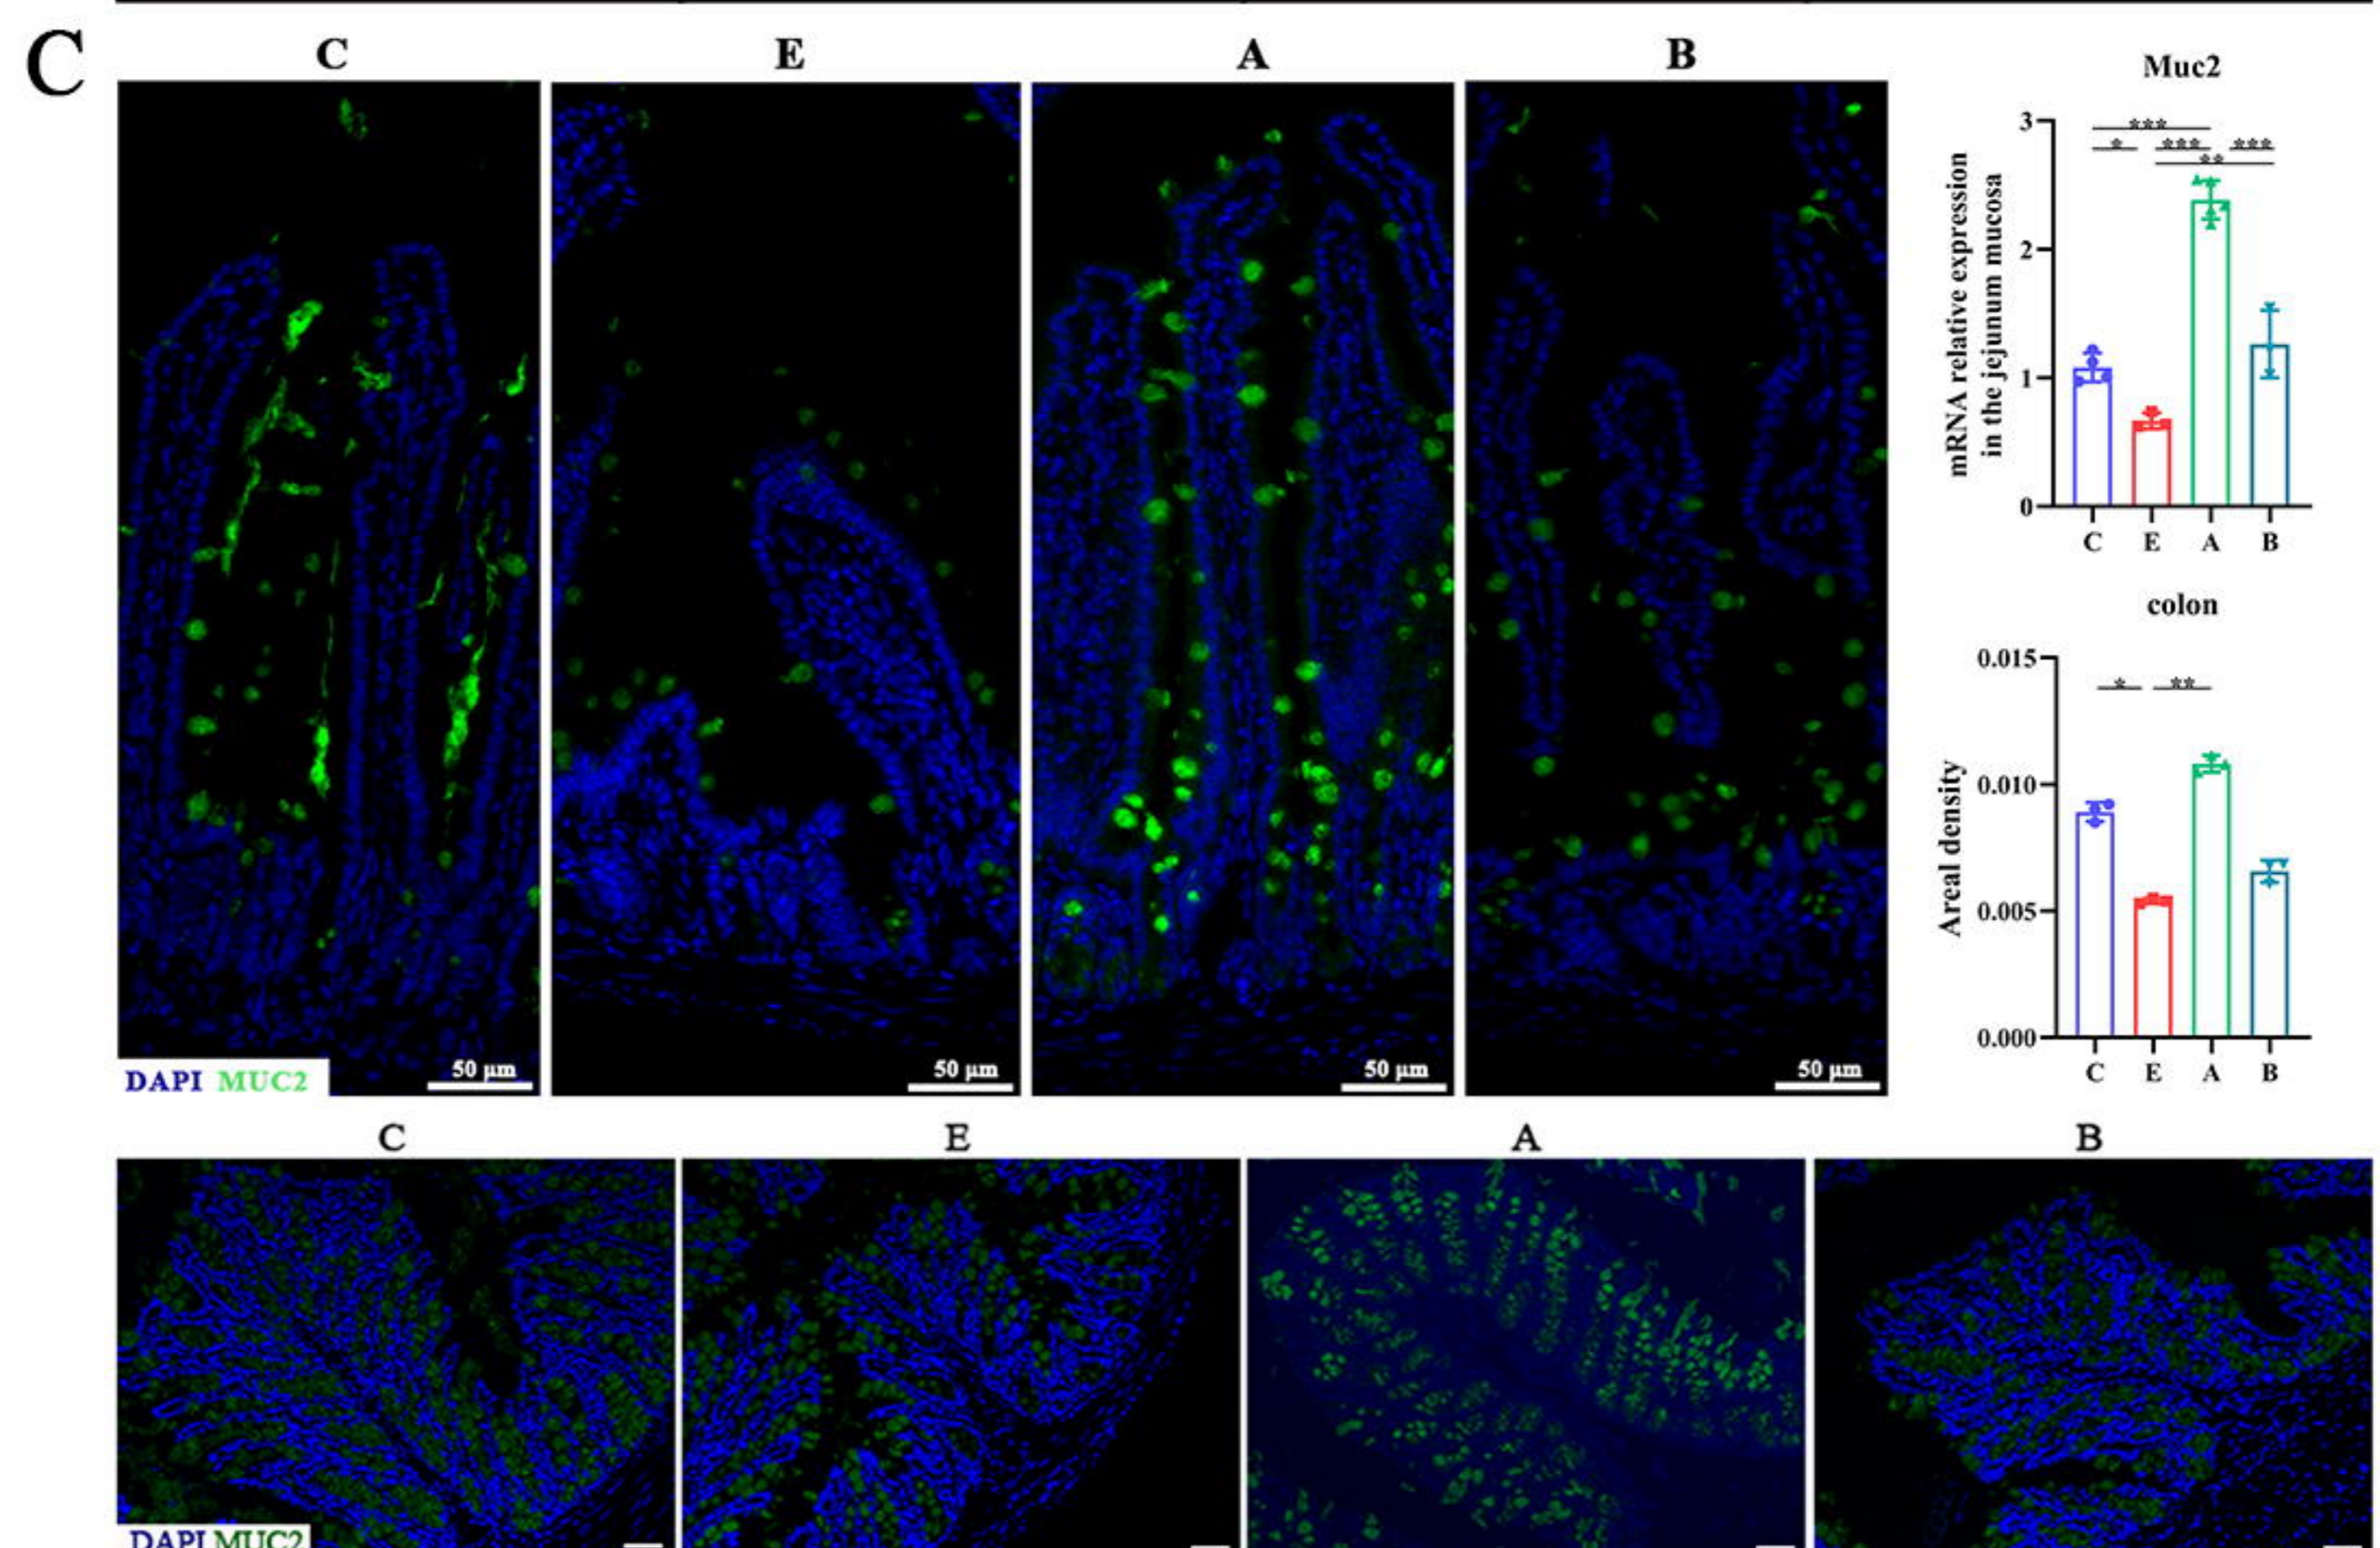

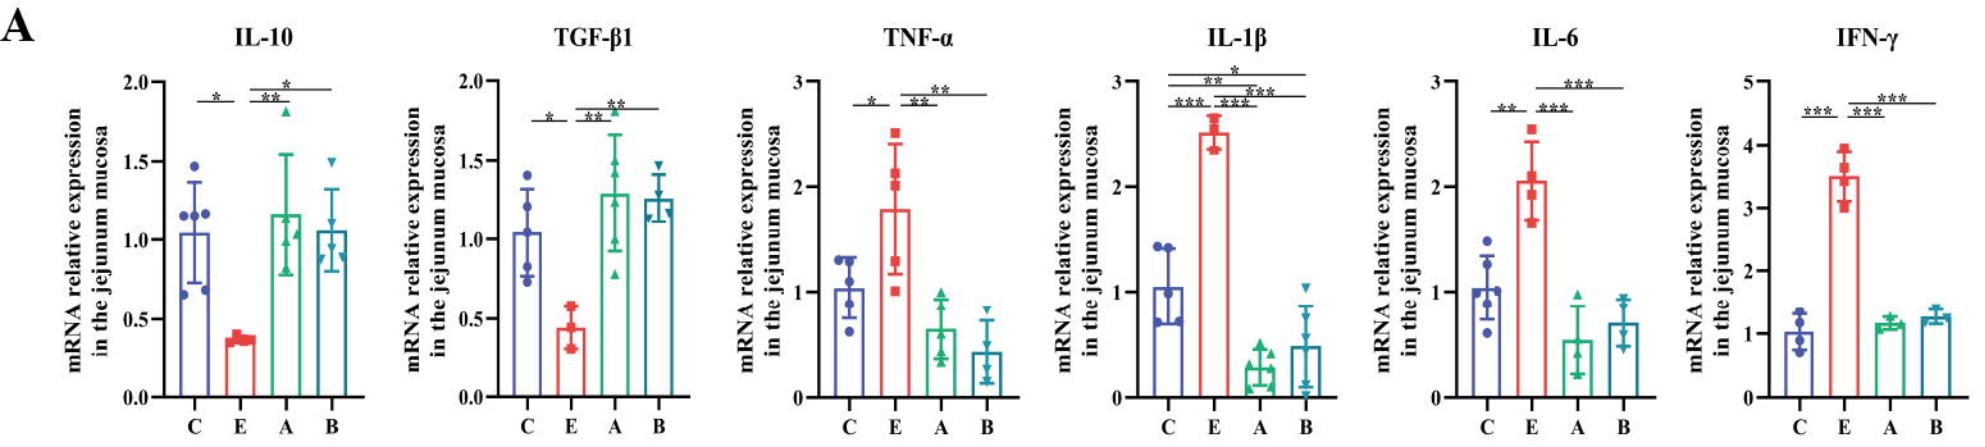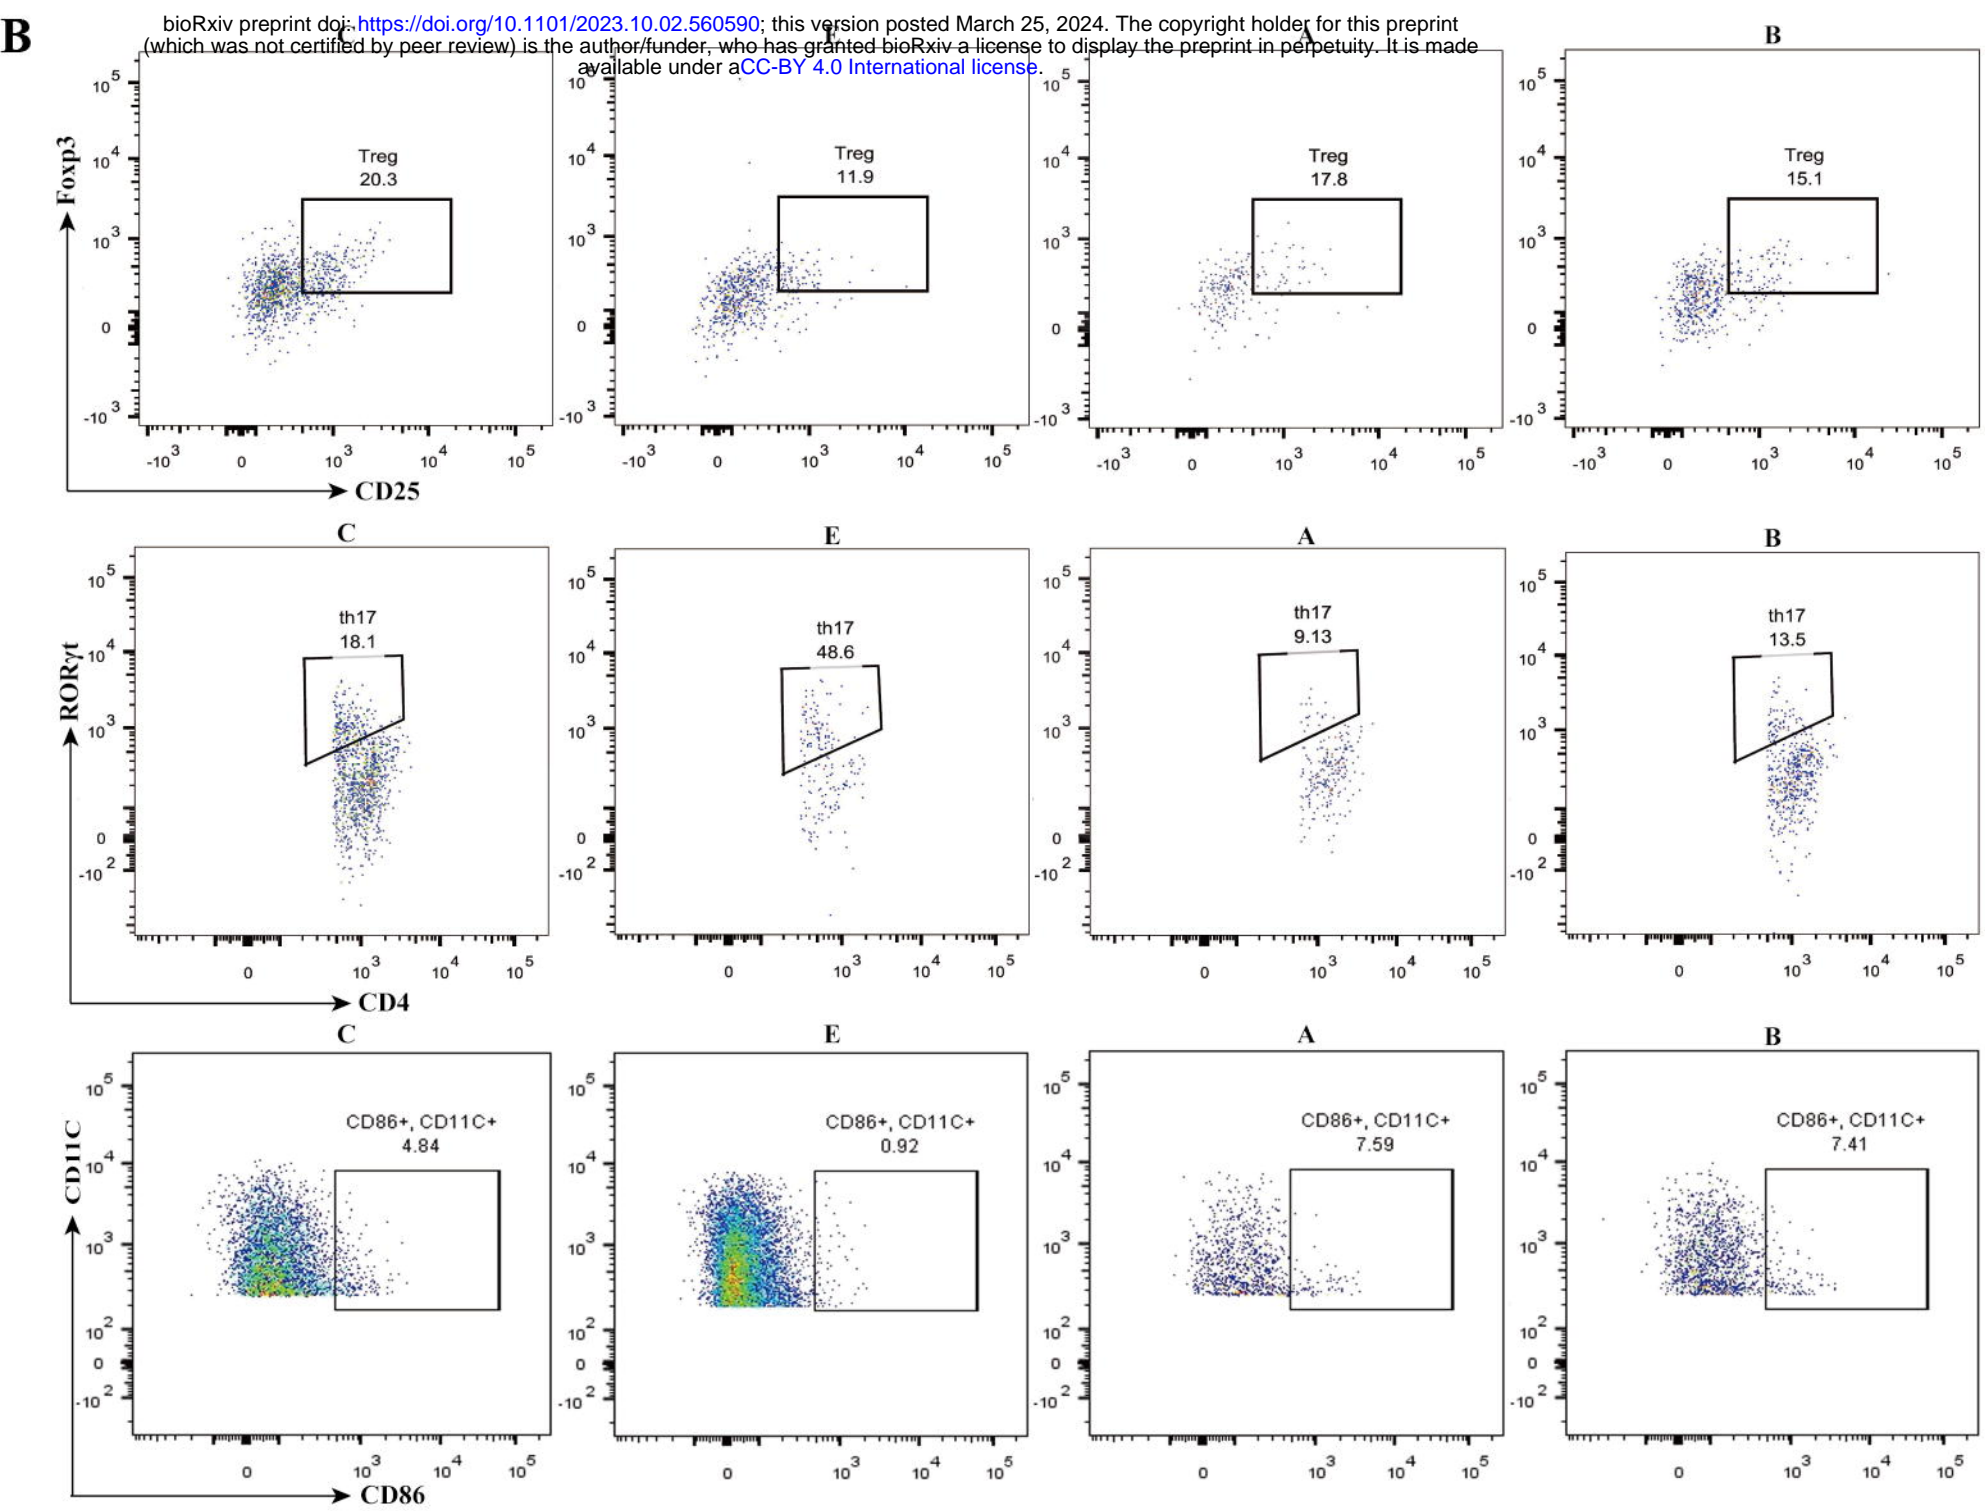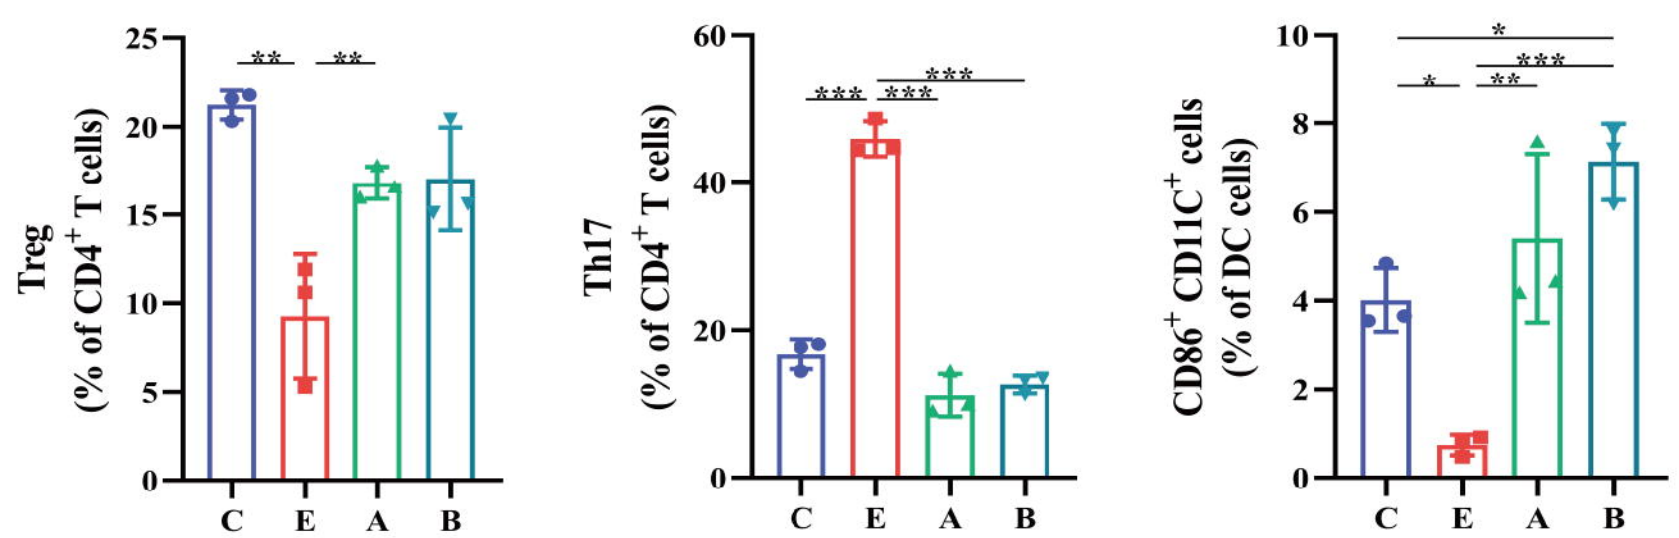



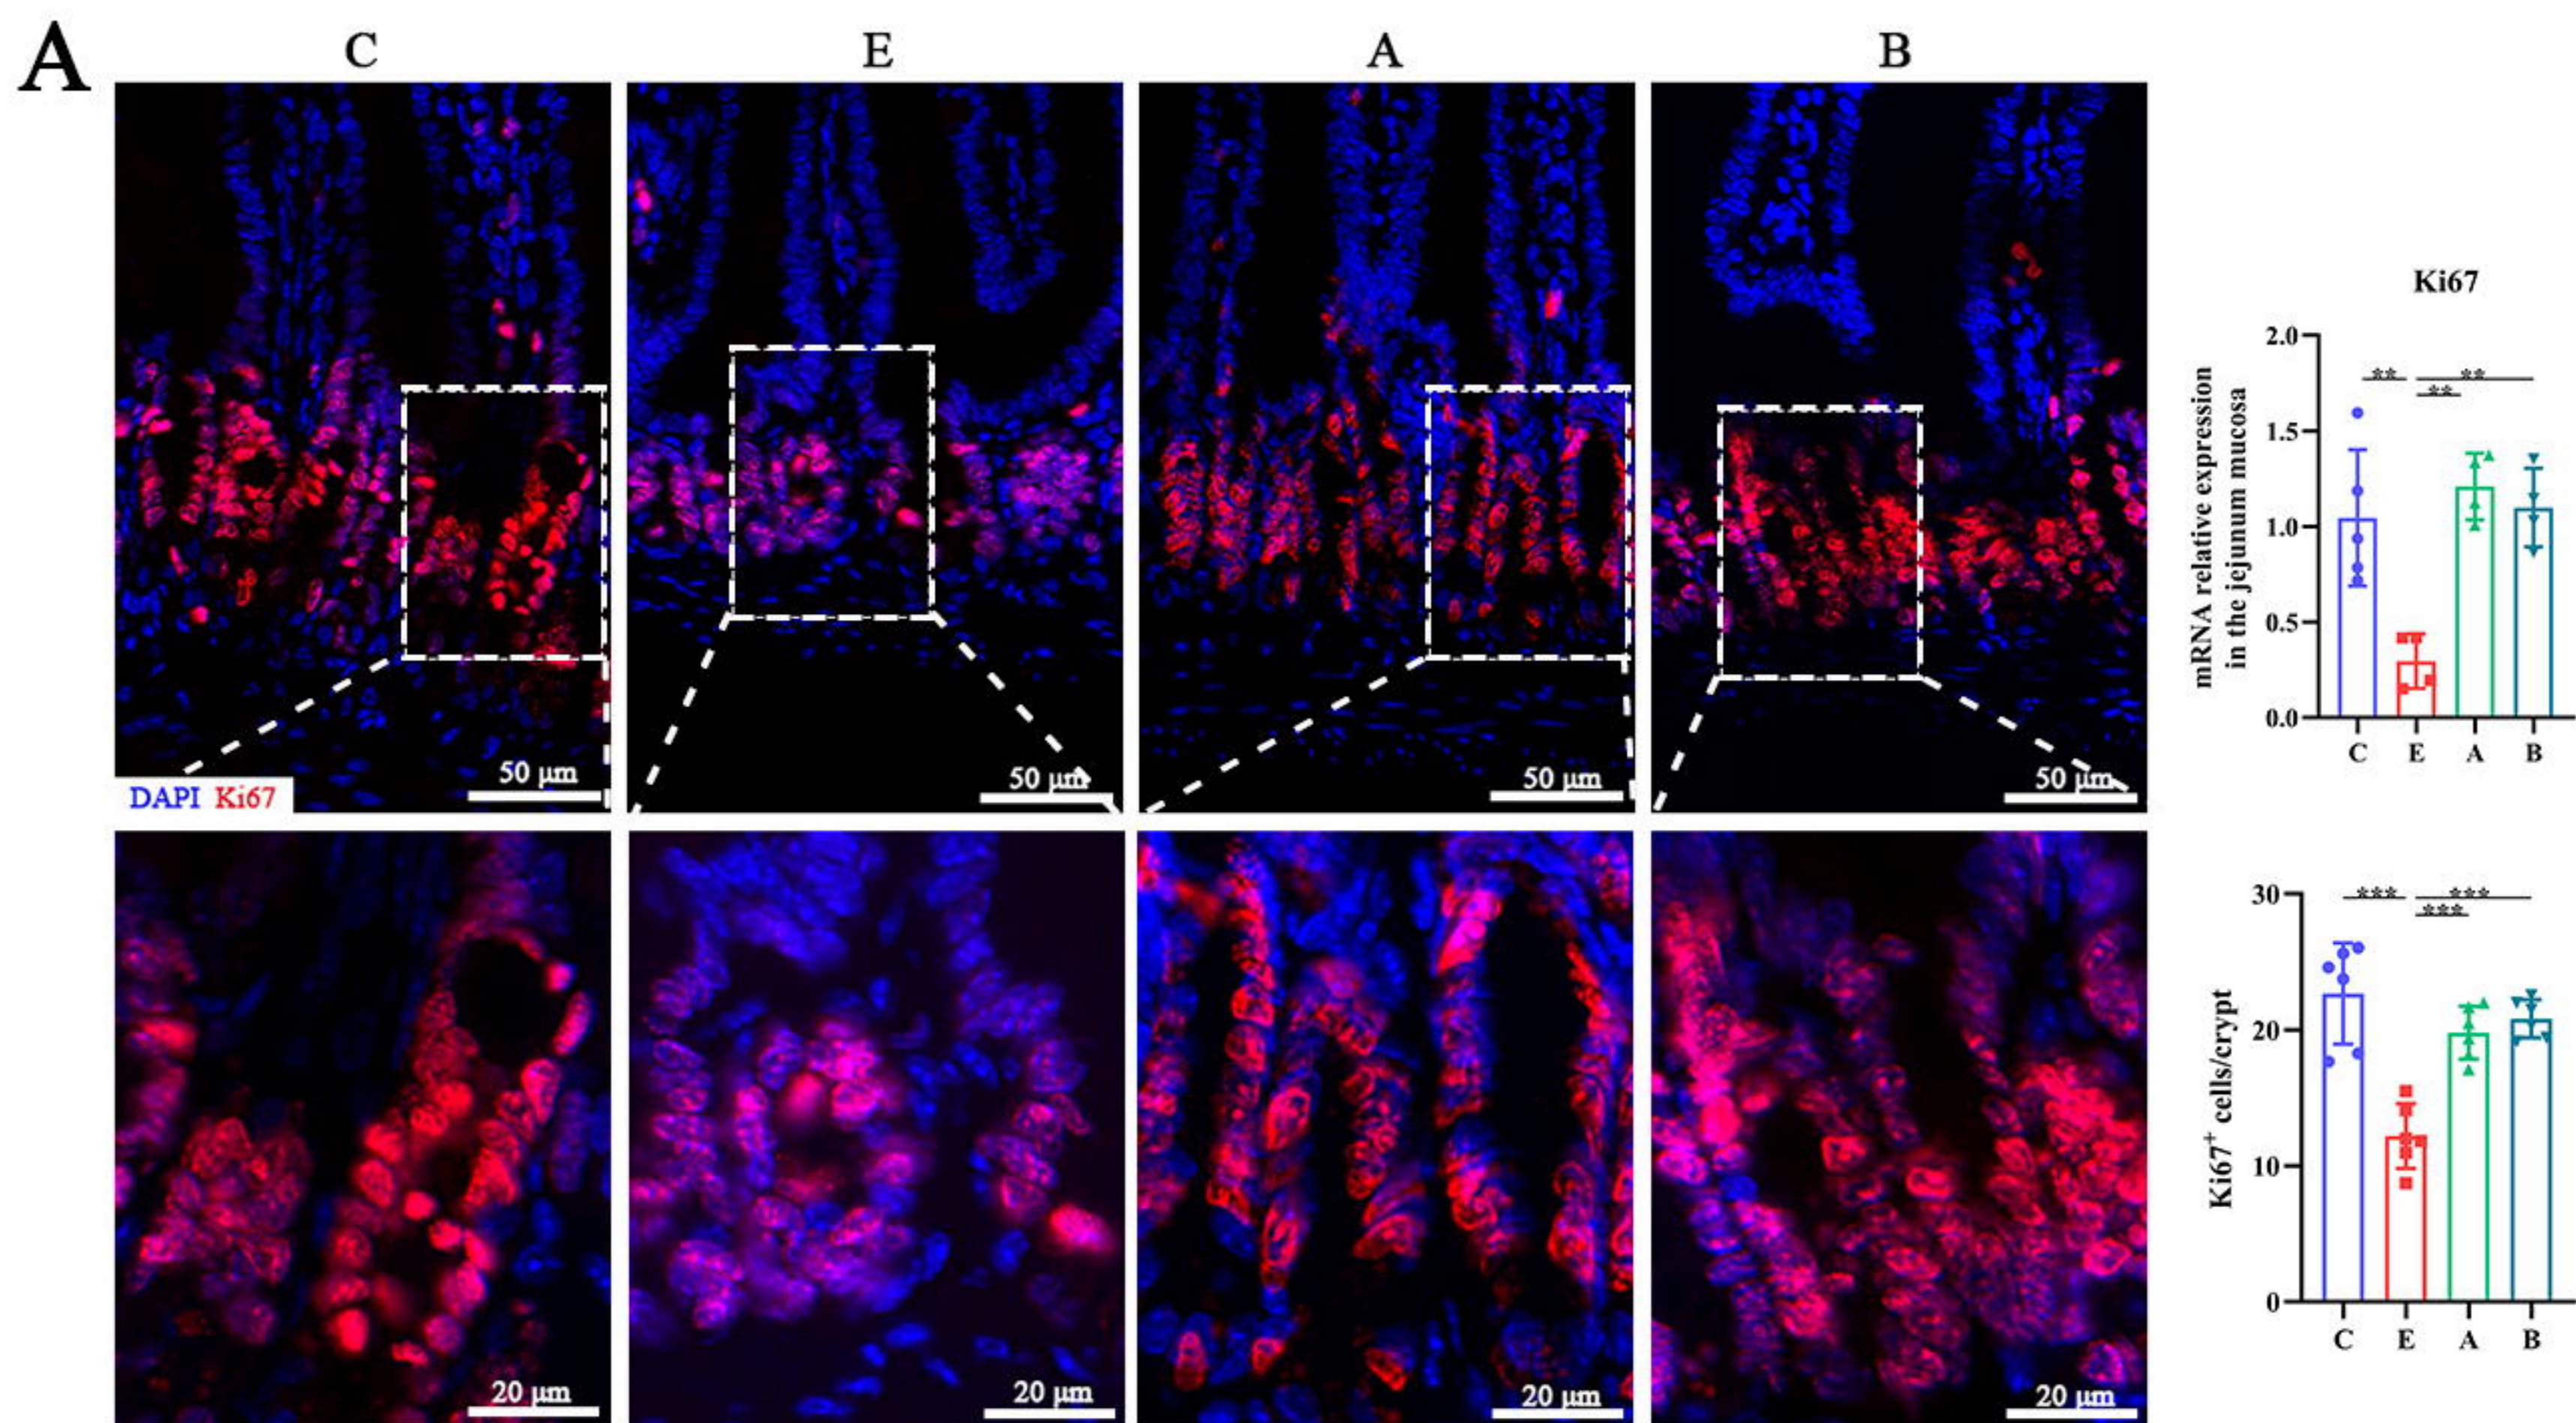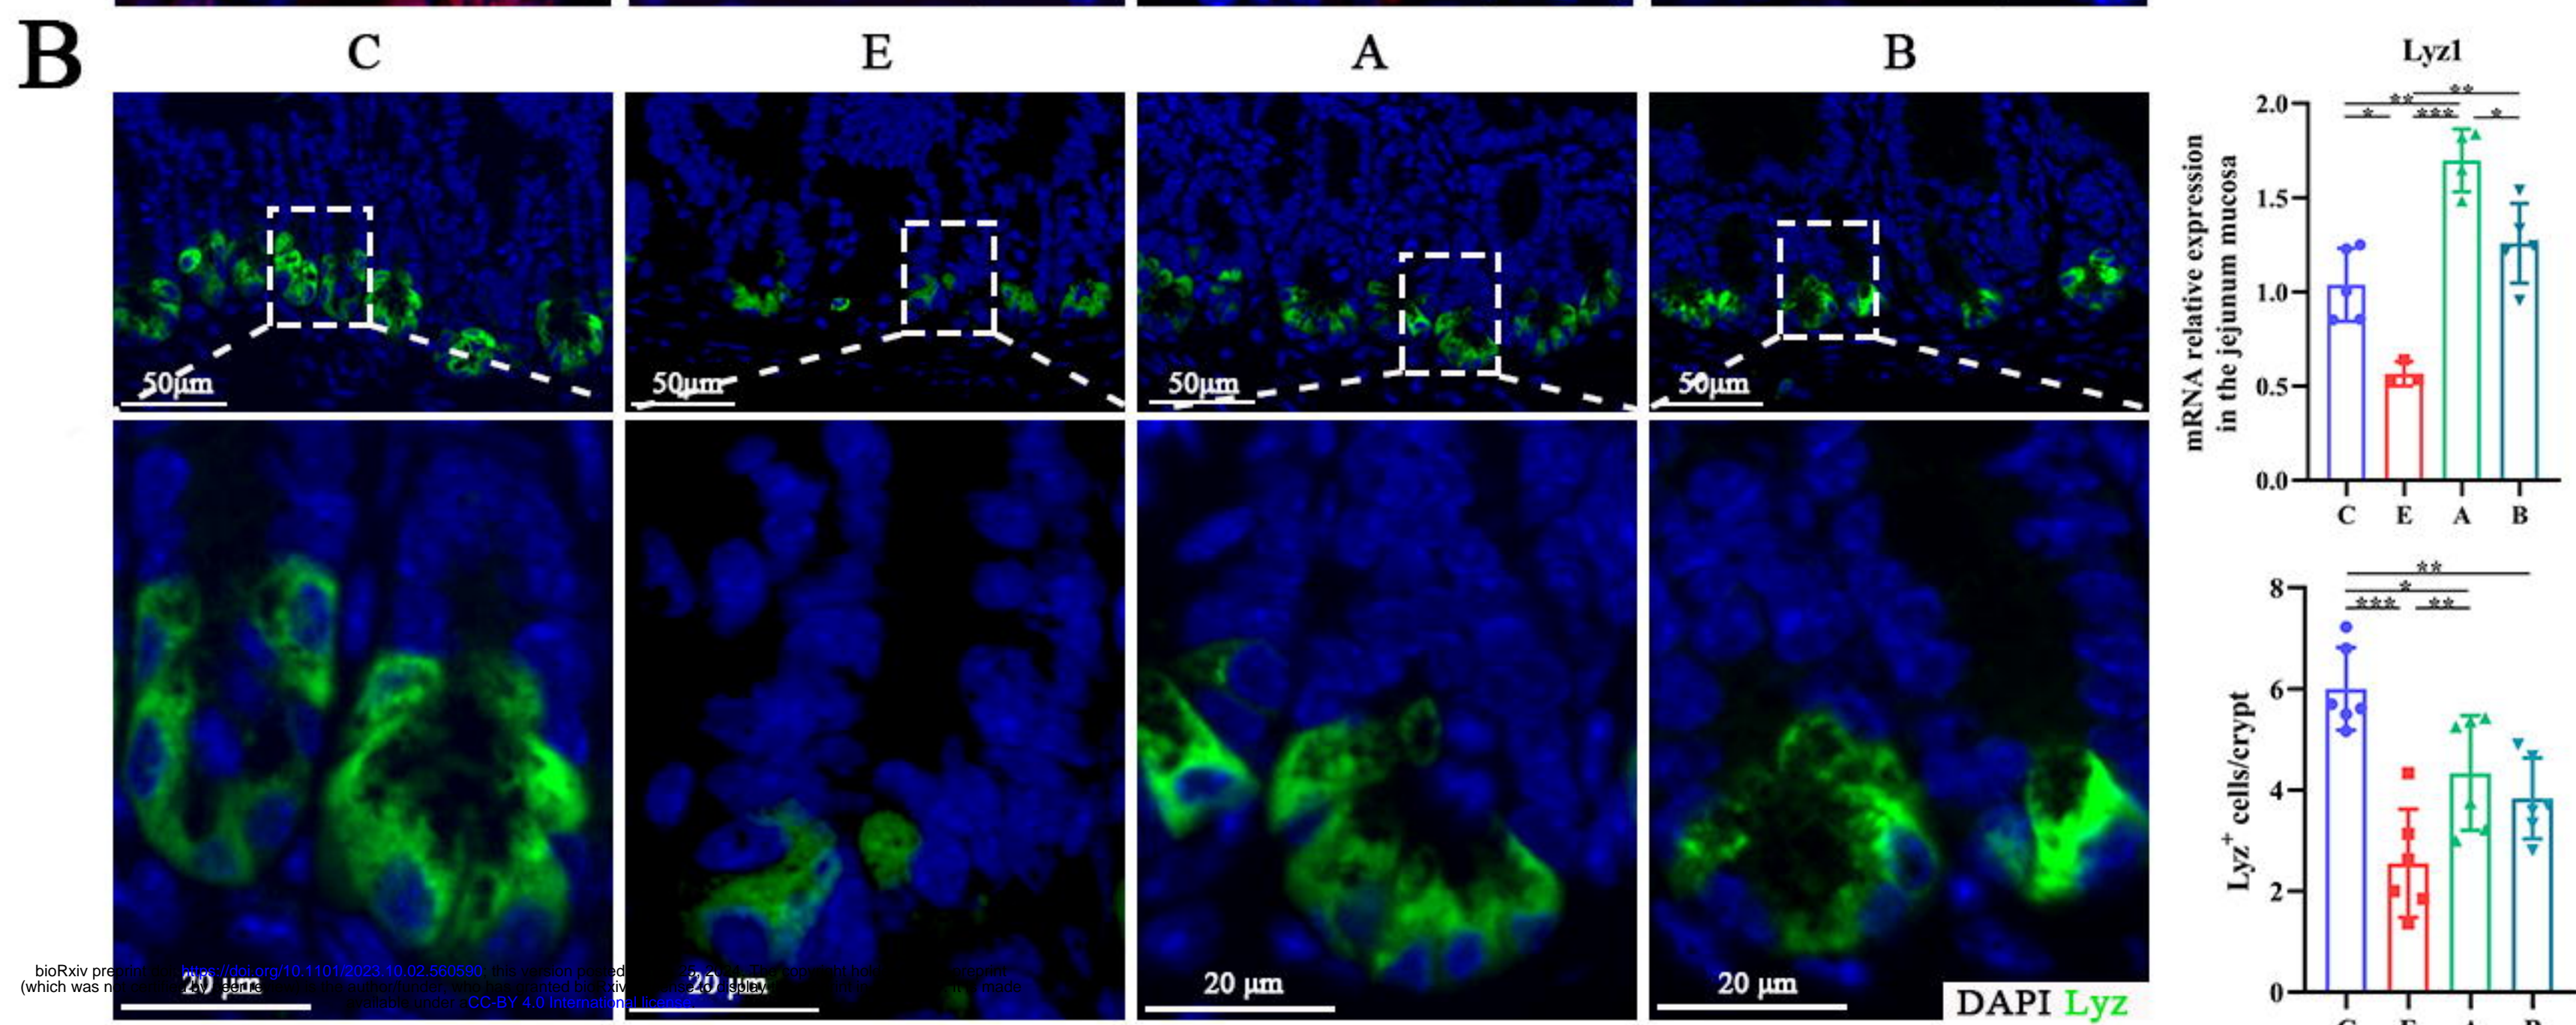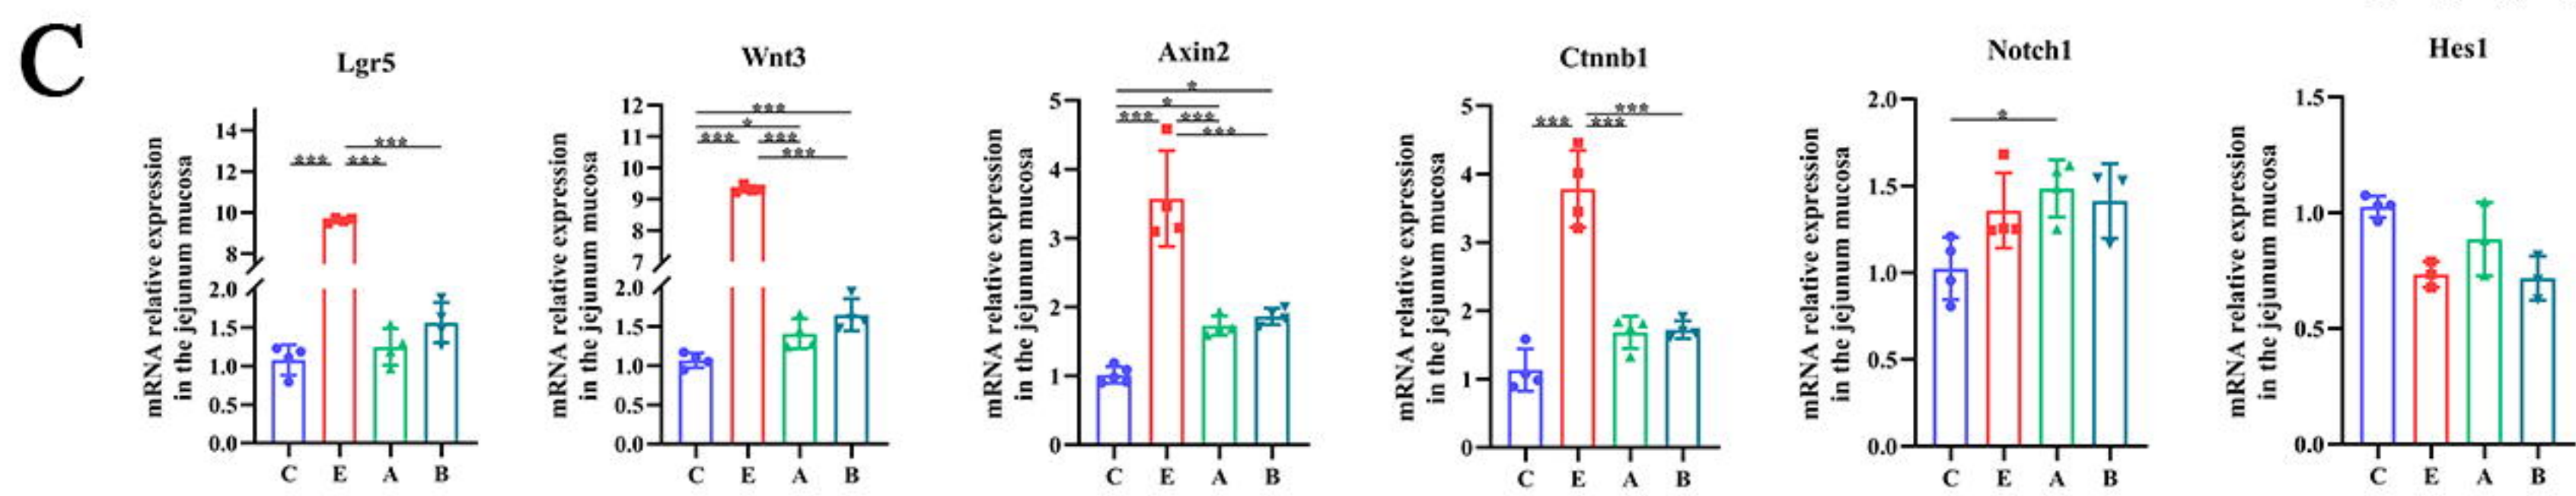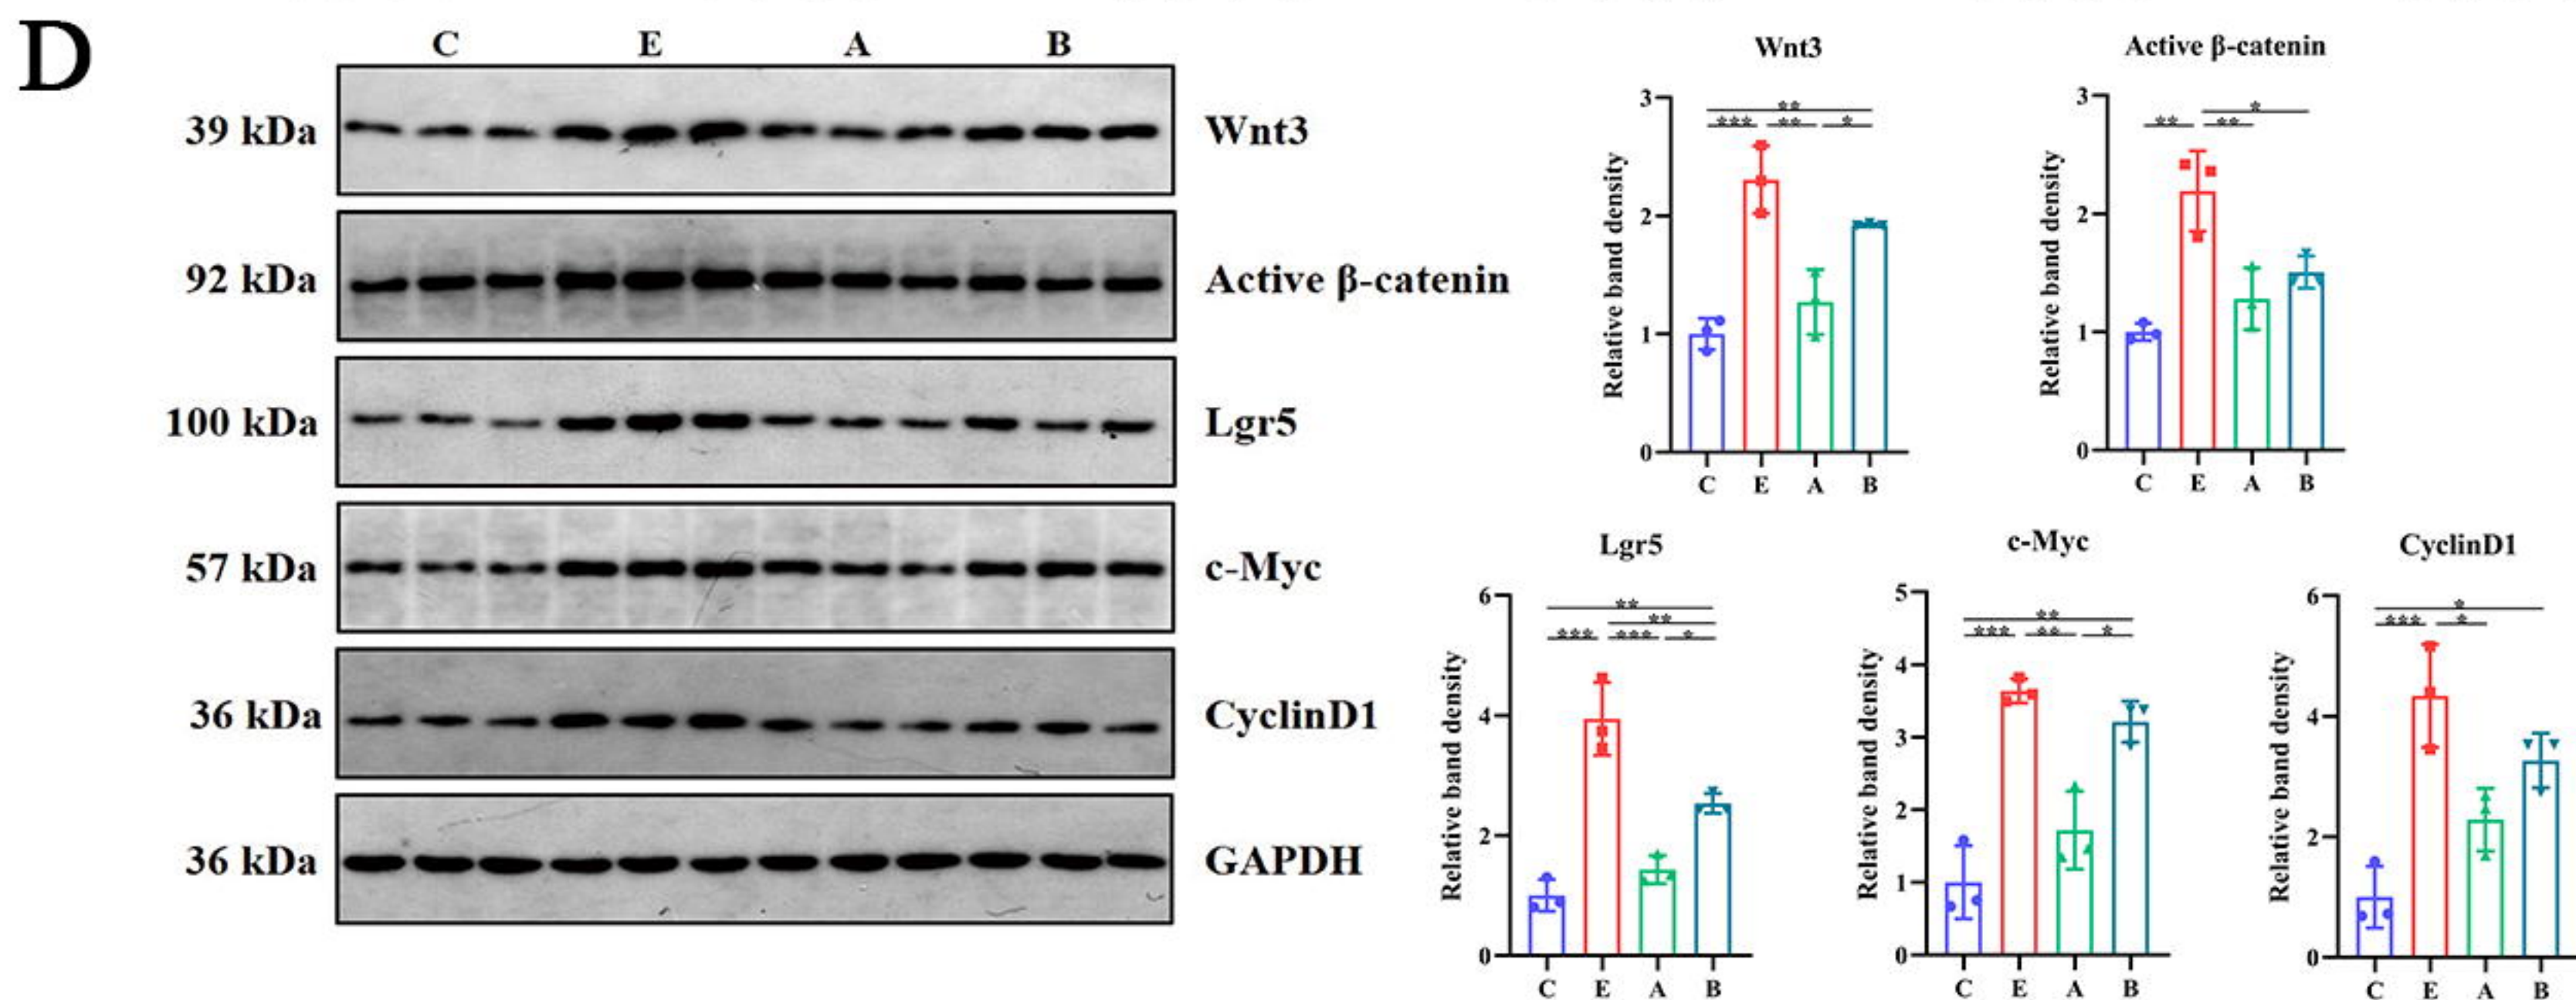

A

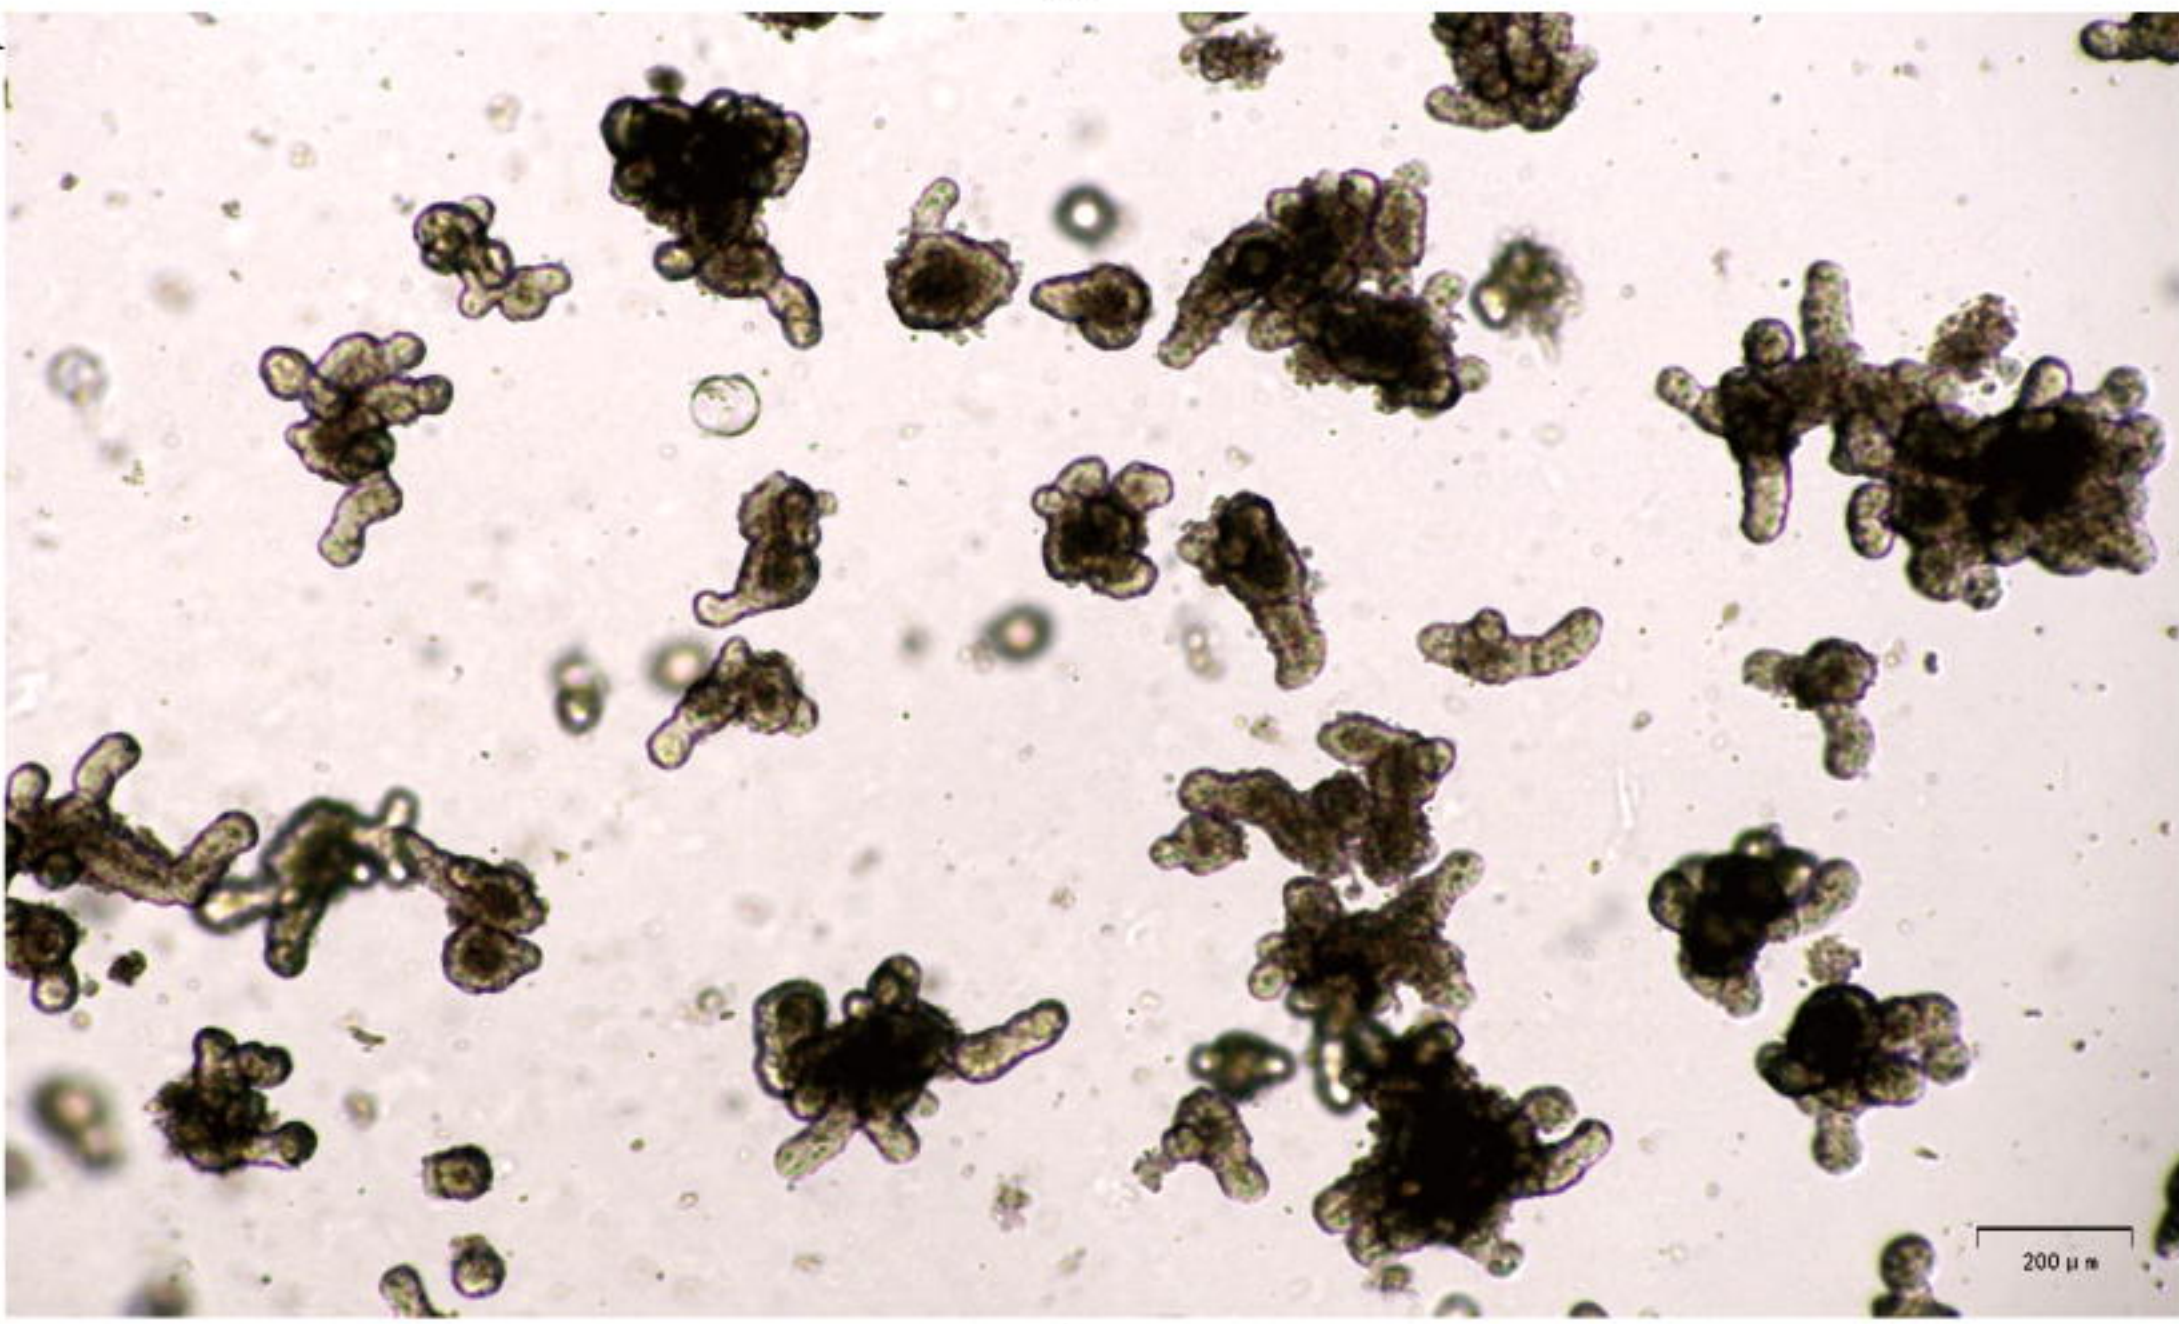

A

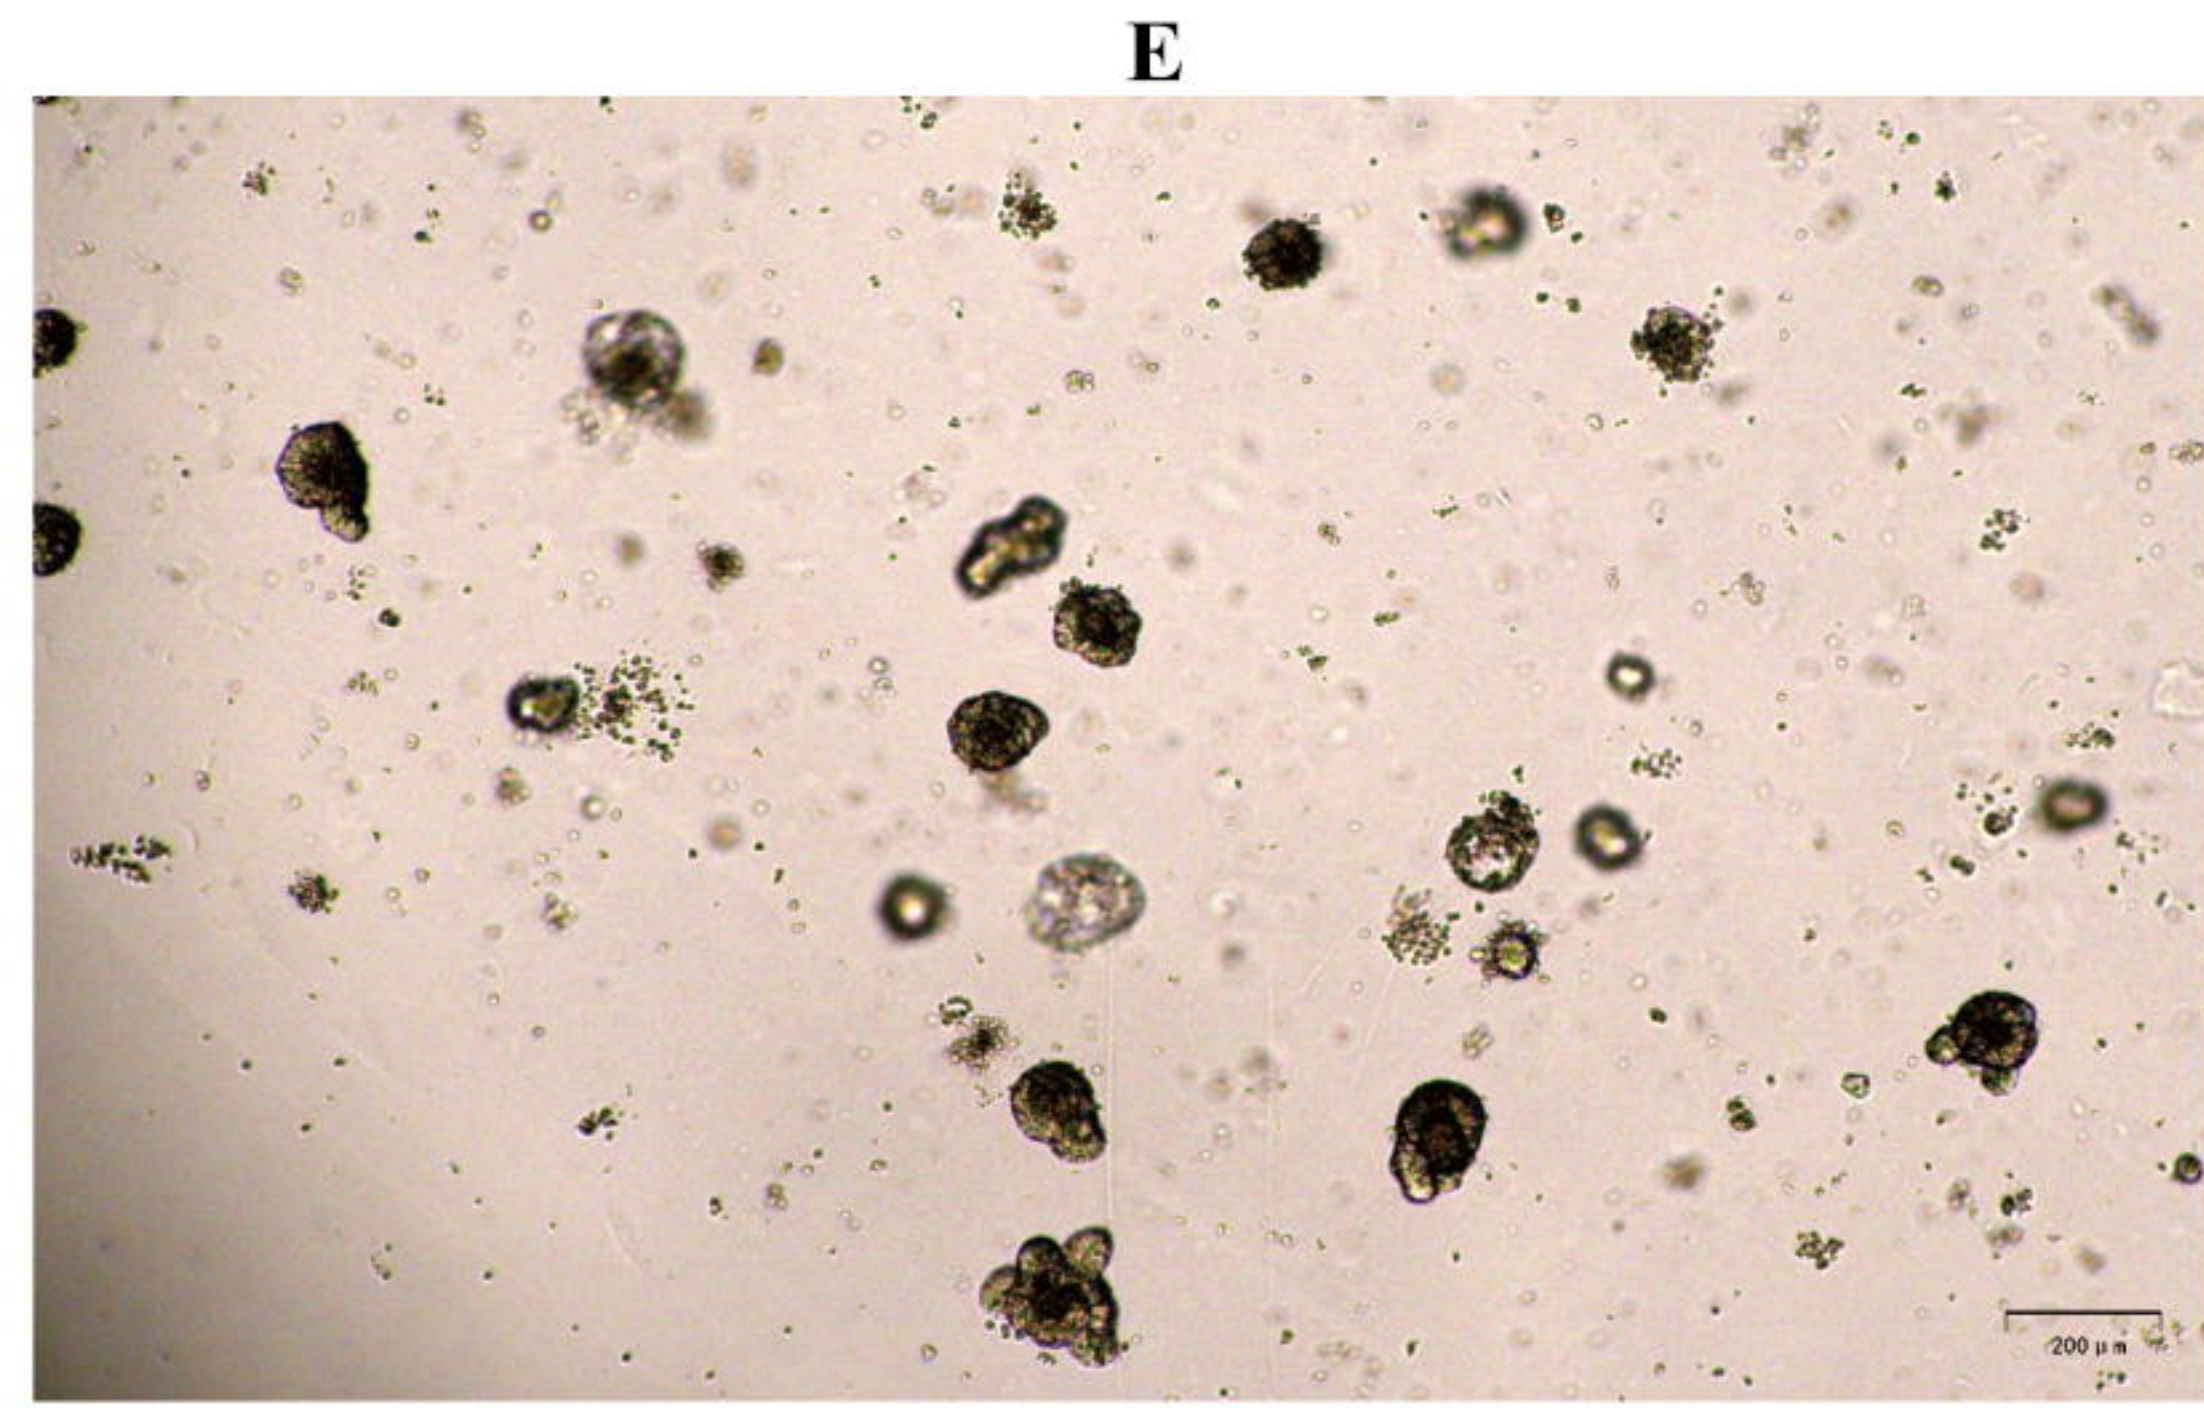

B

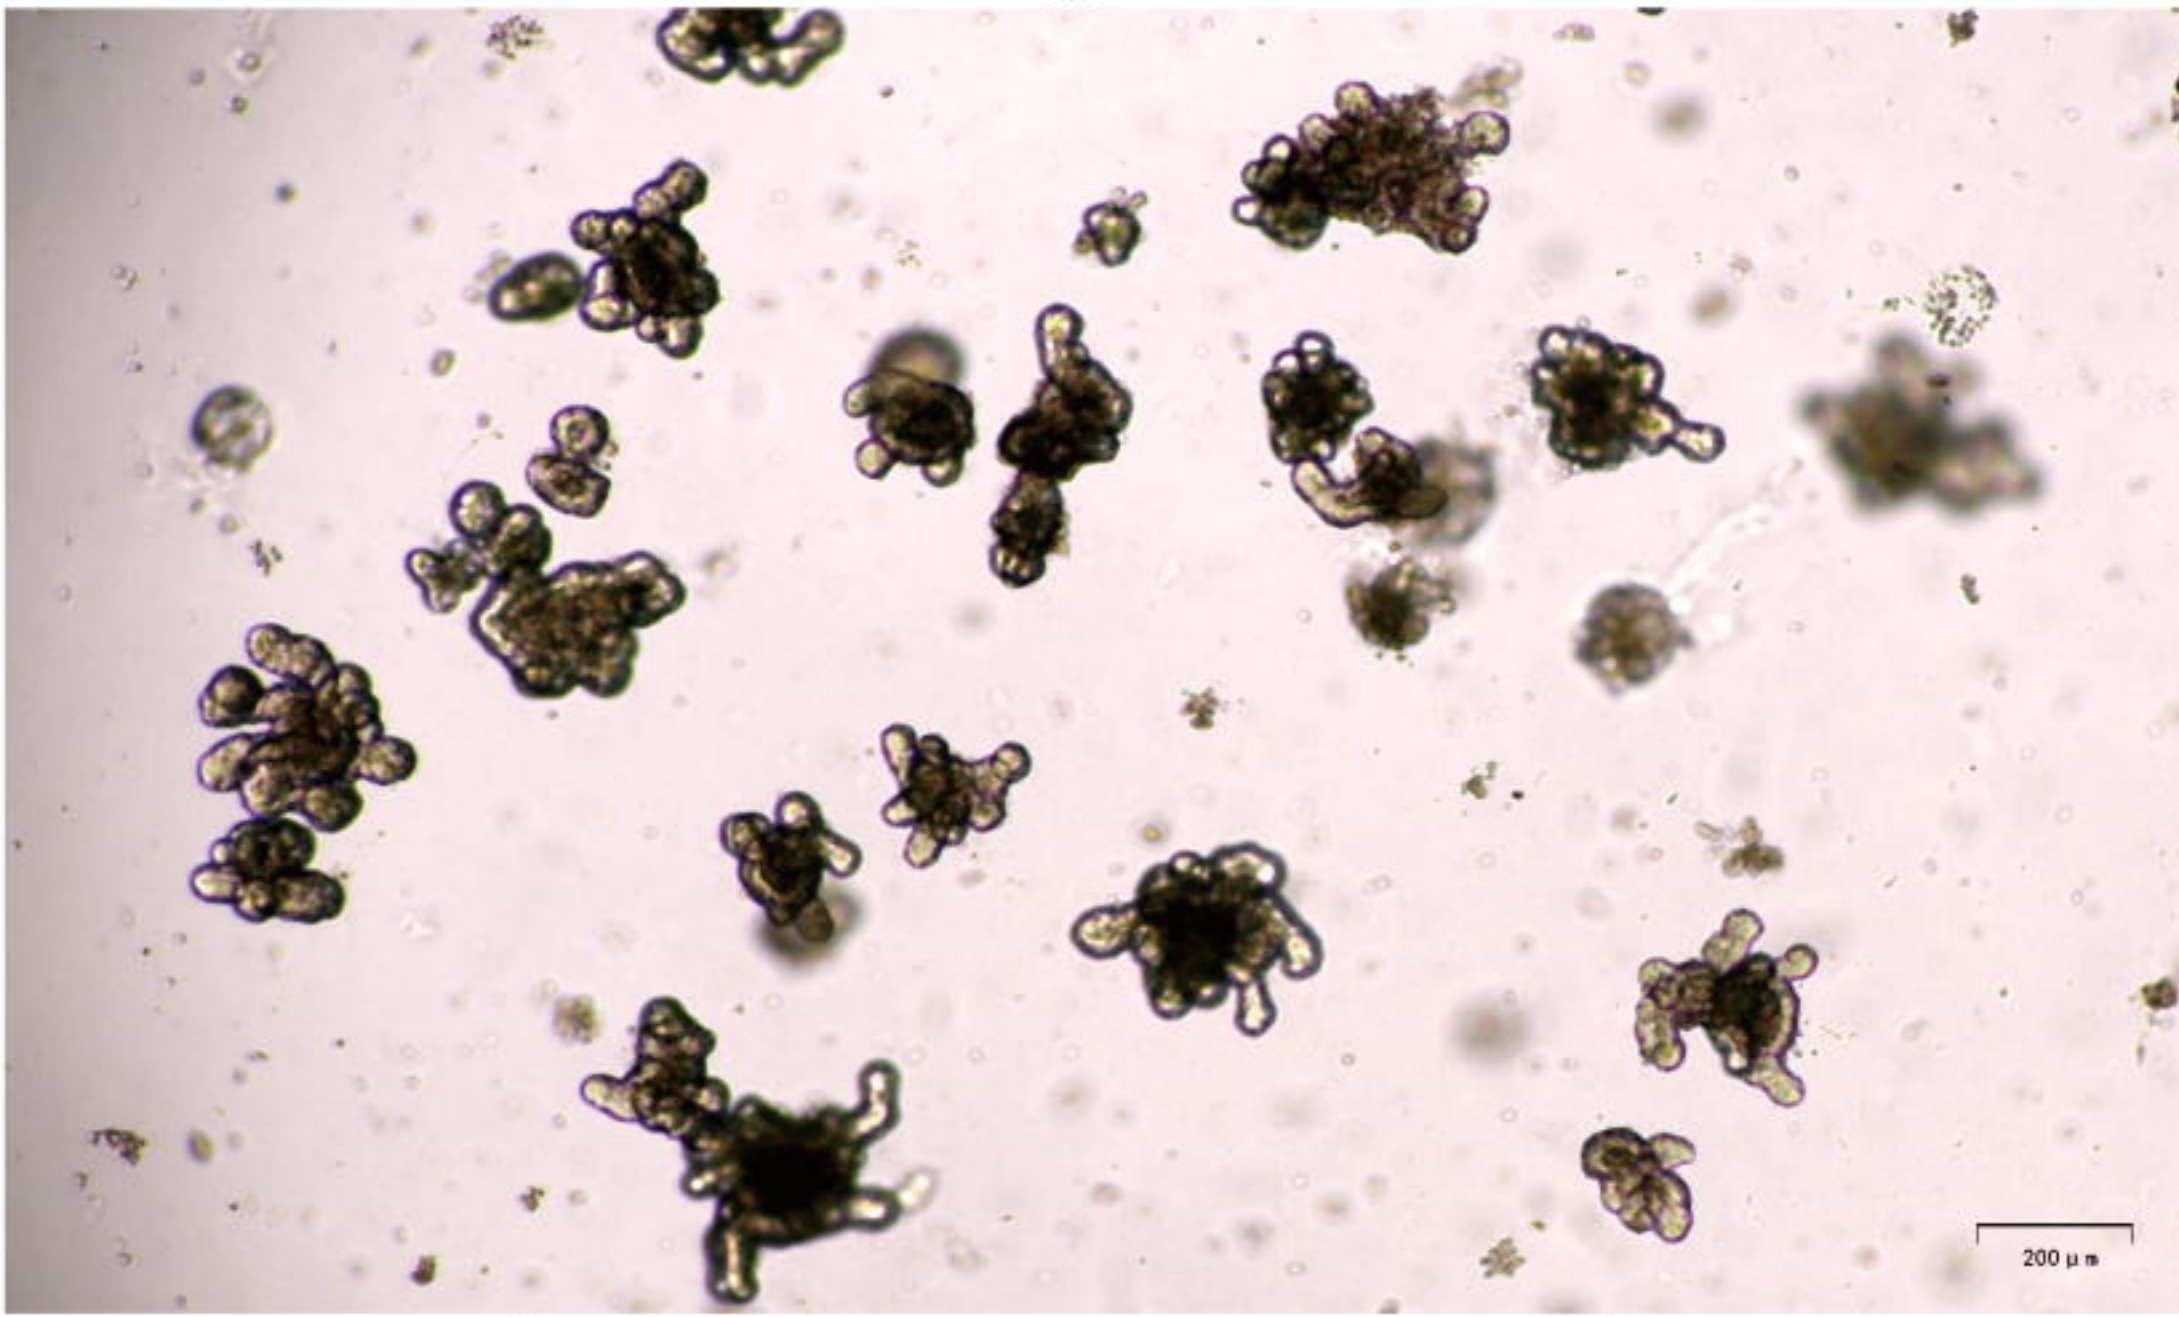

C

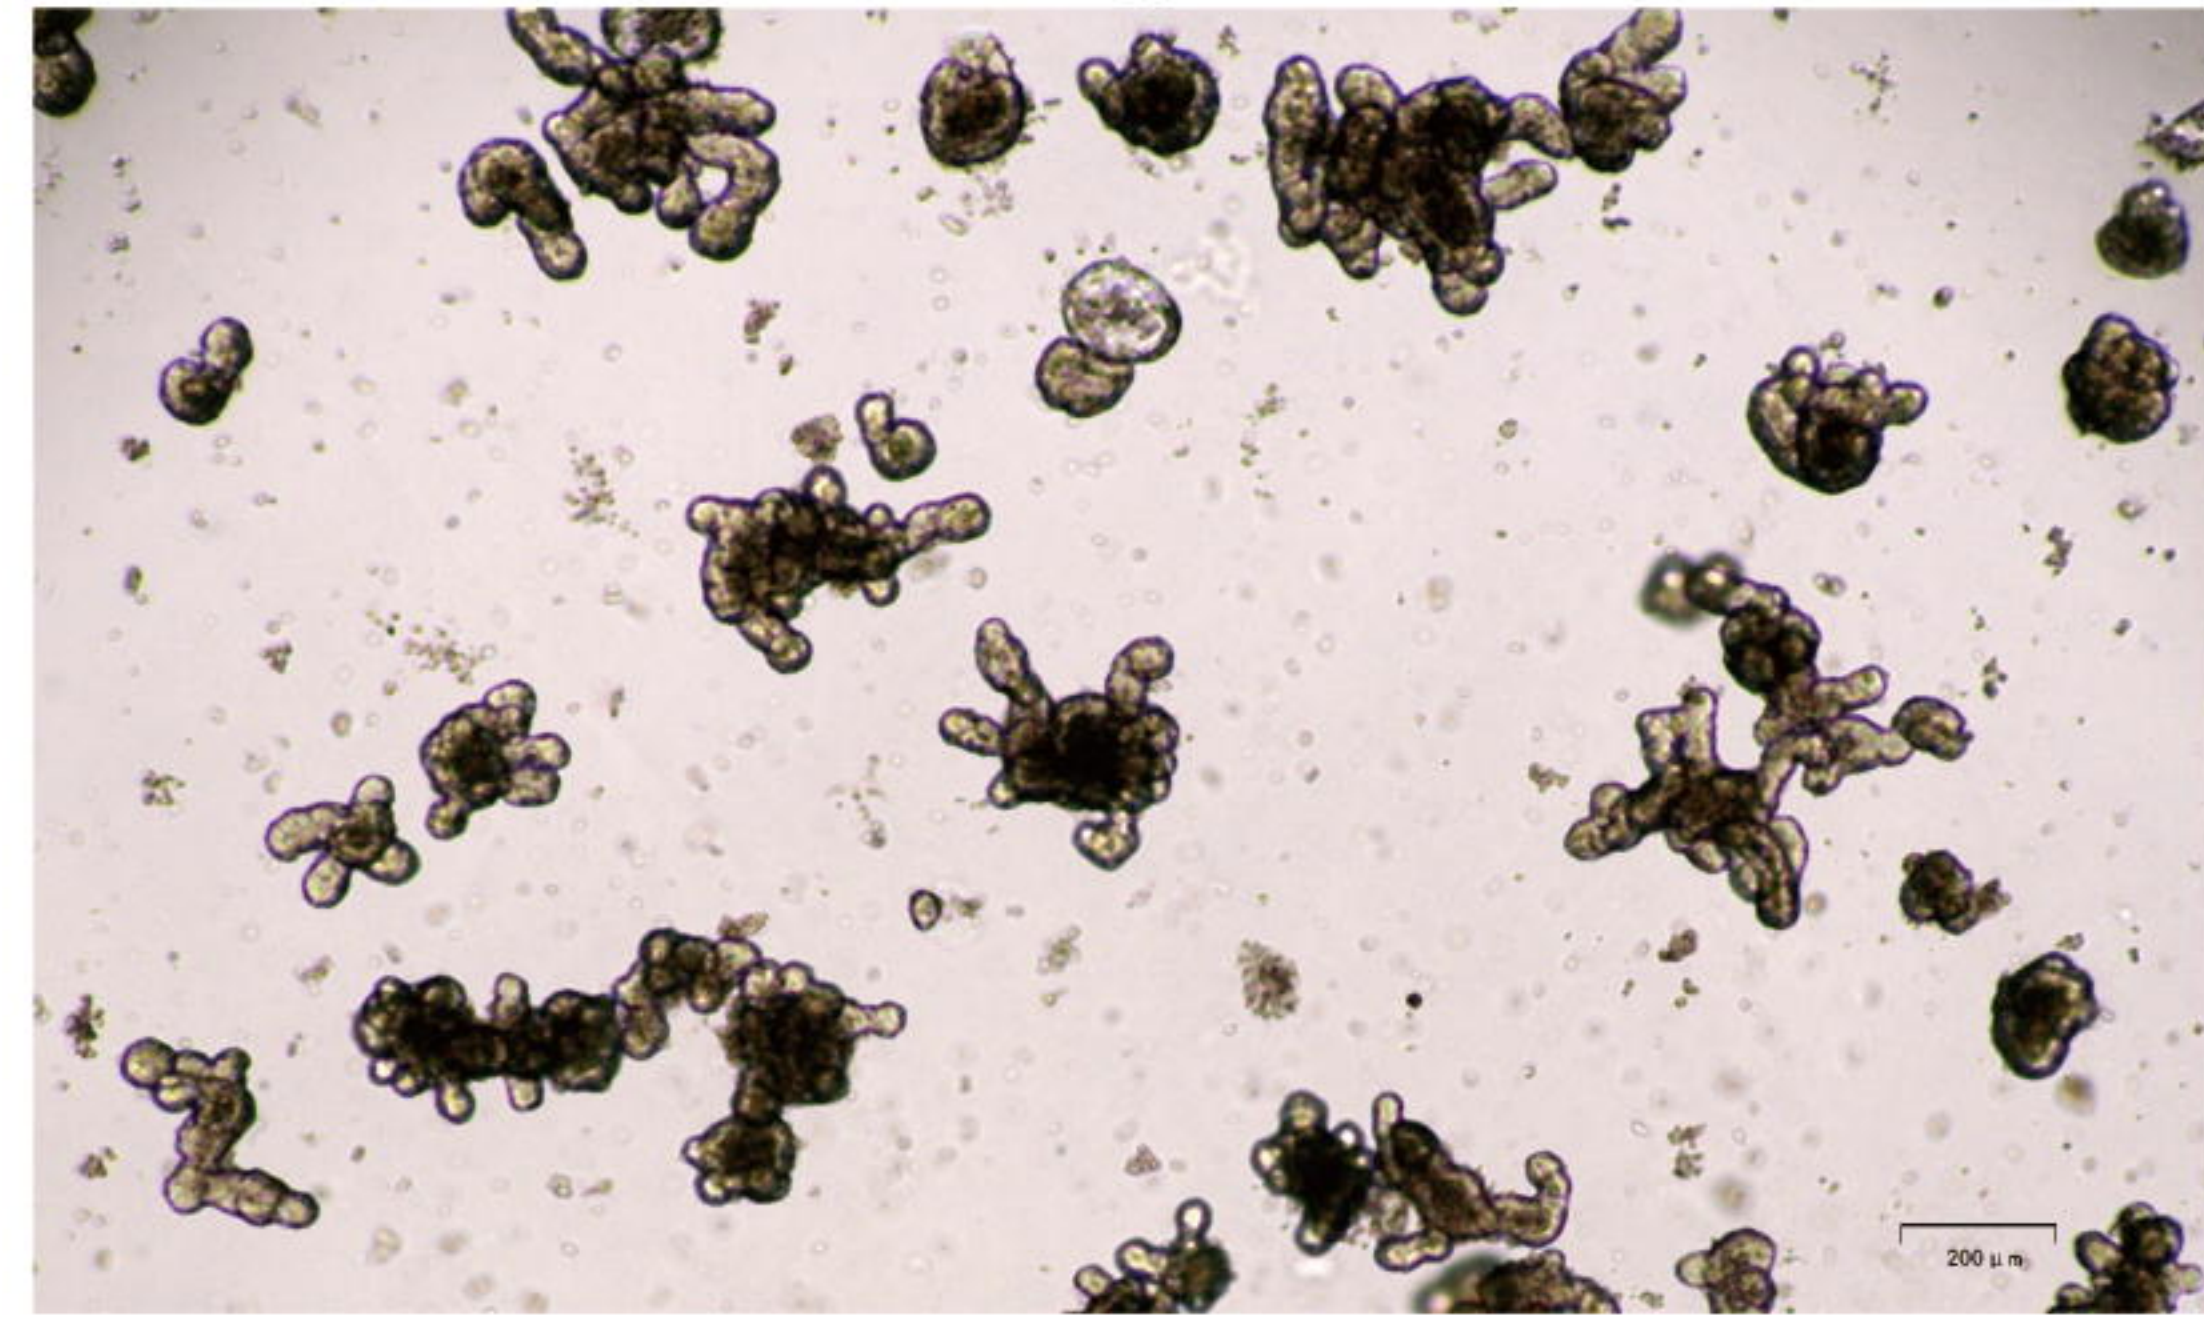

D

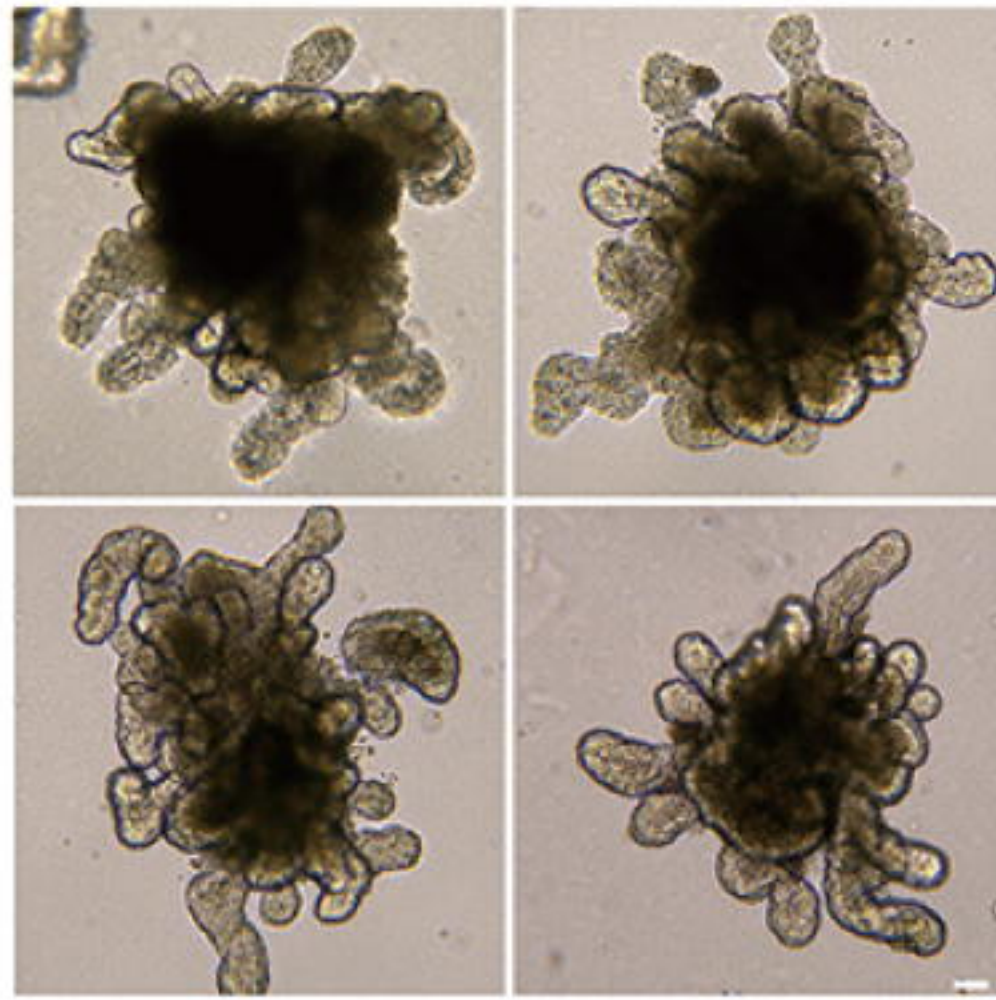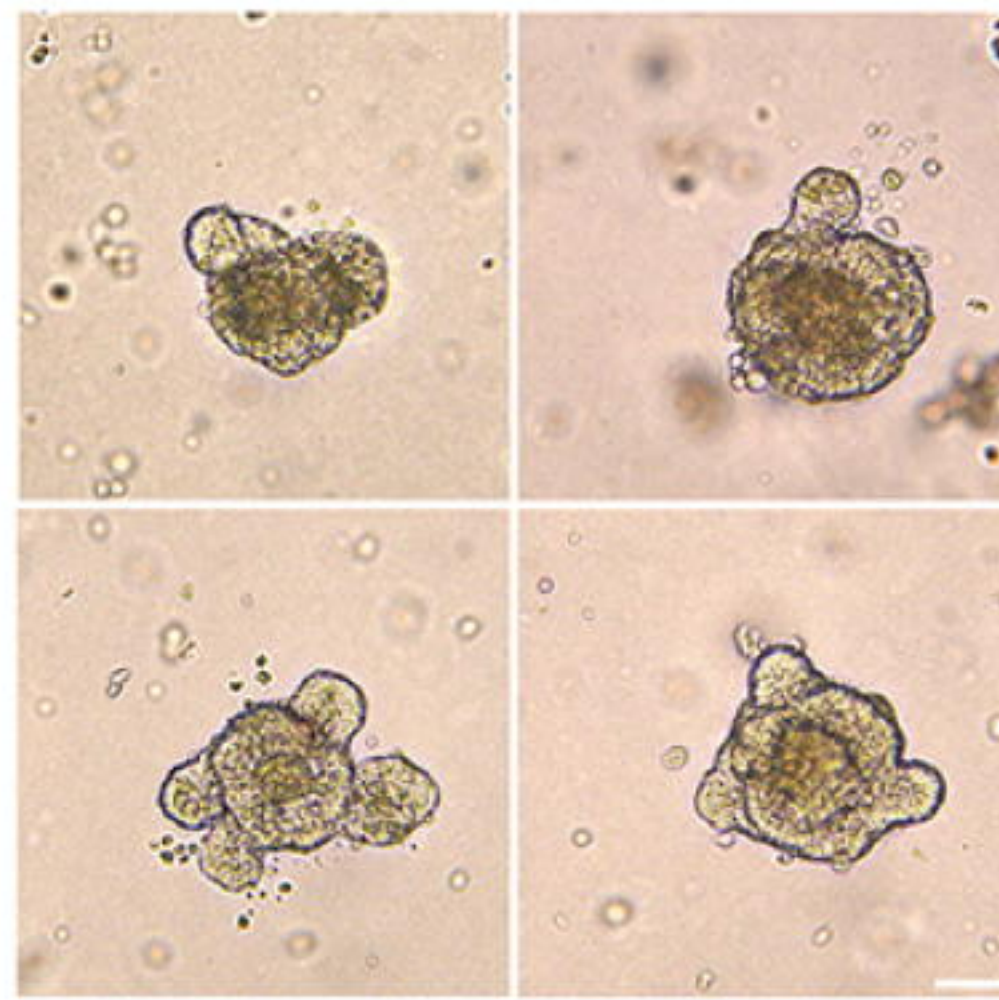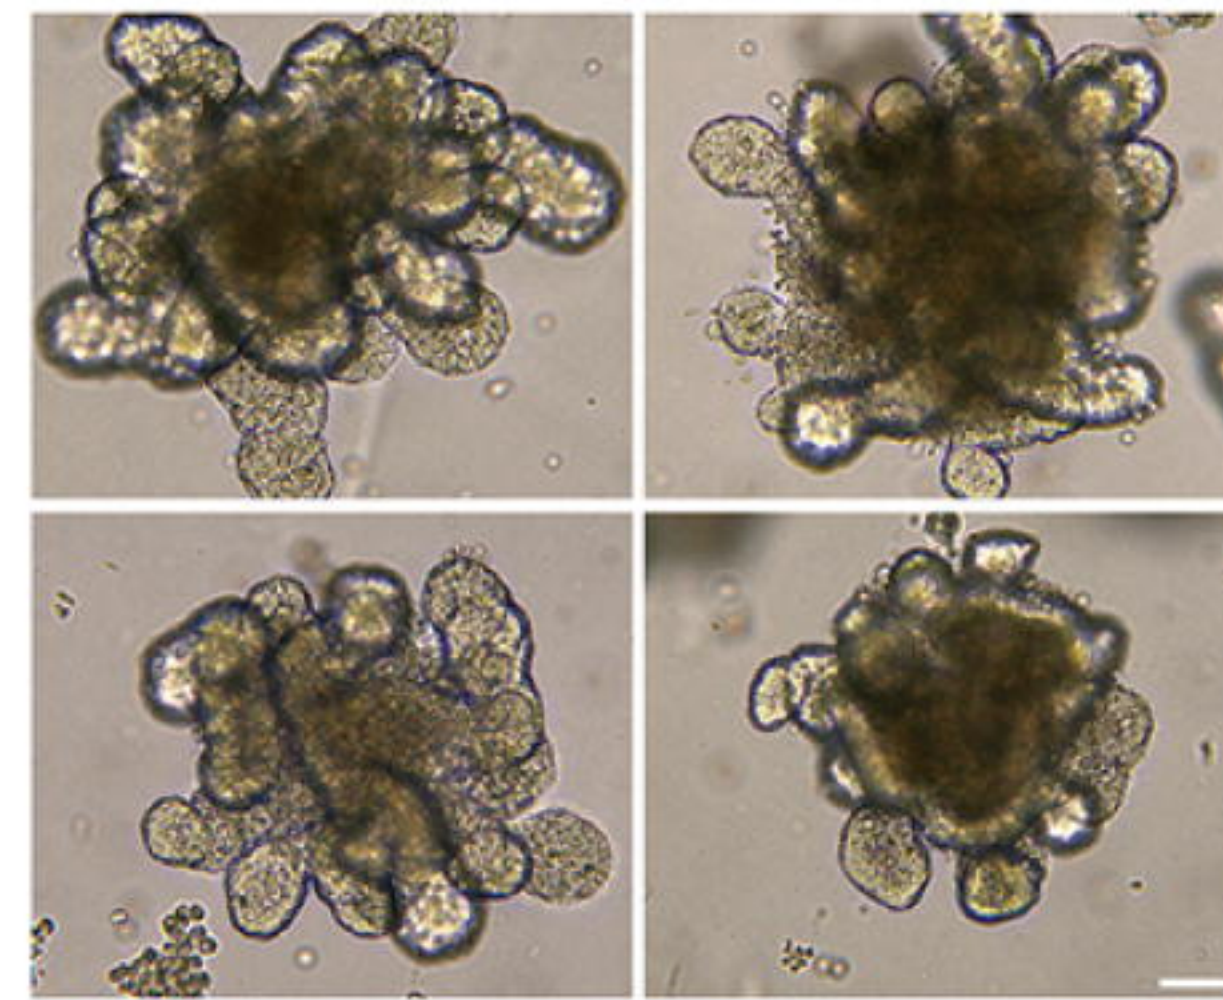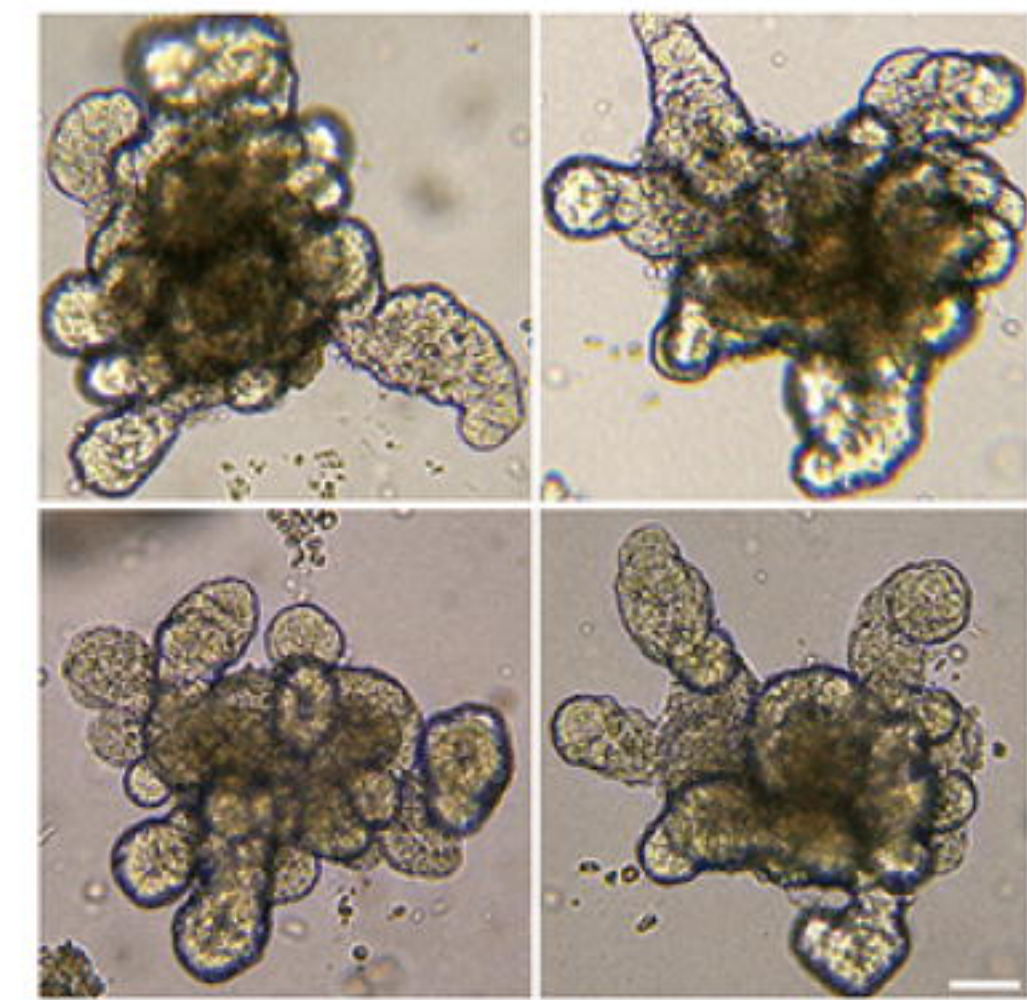

B

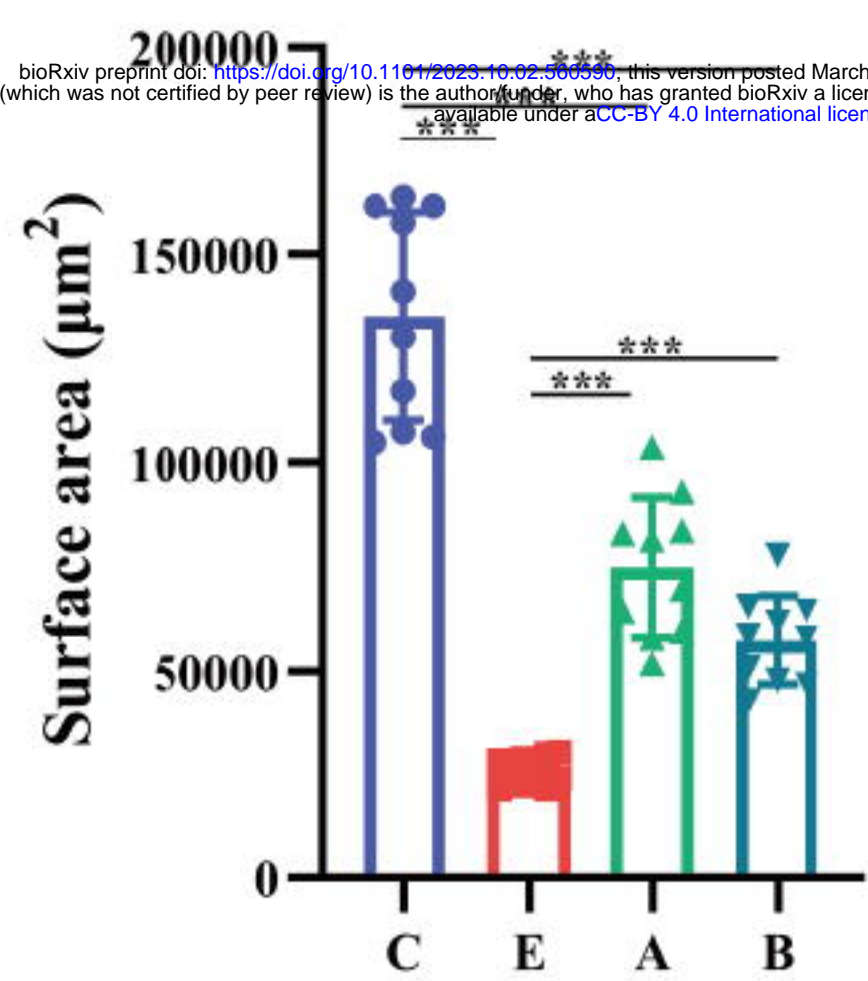

C

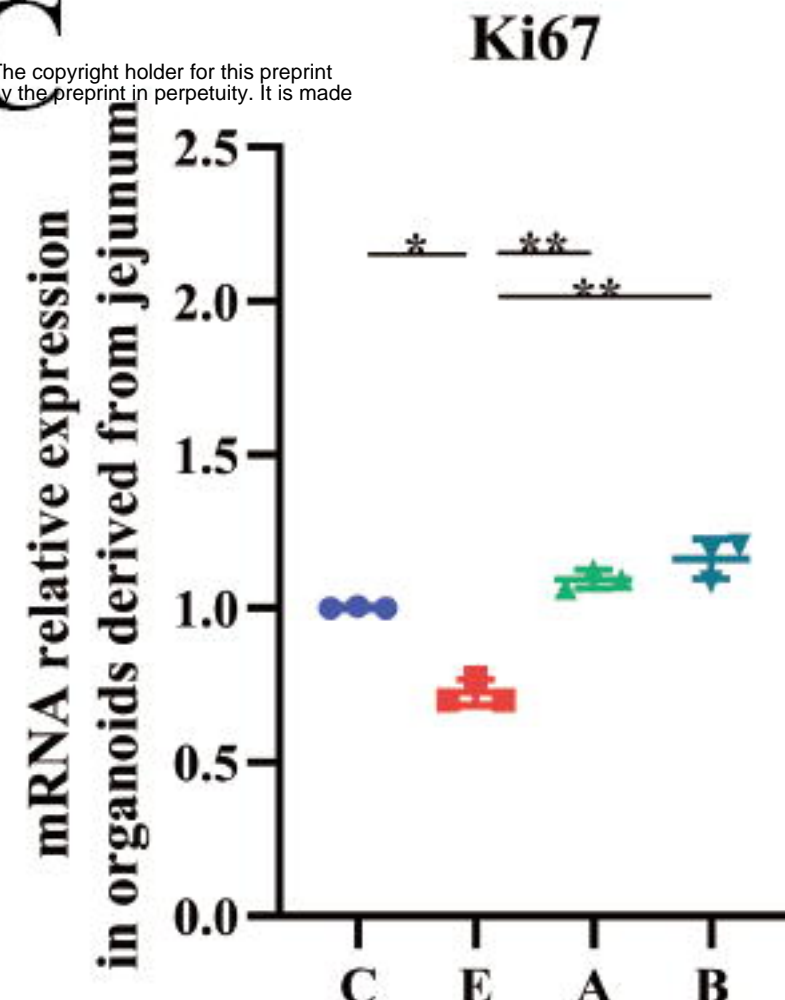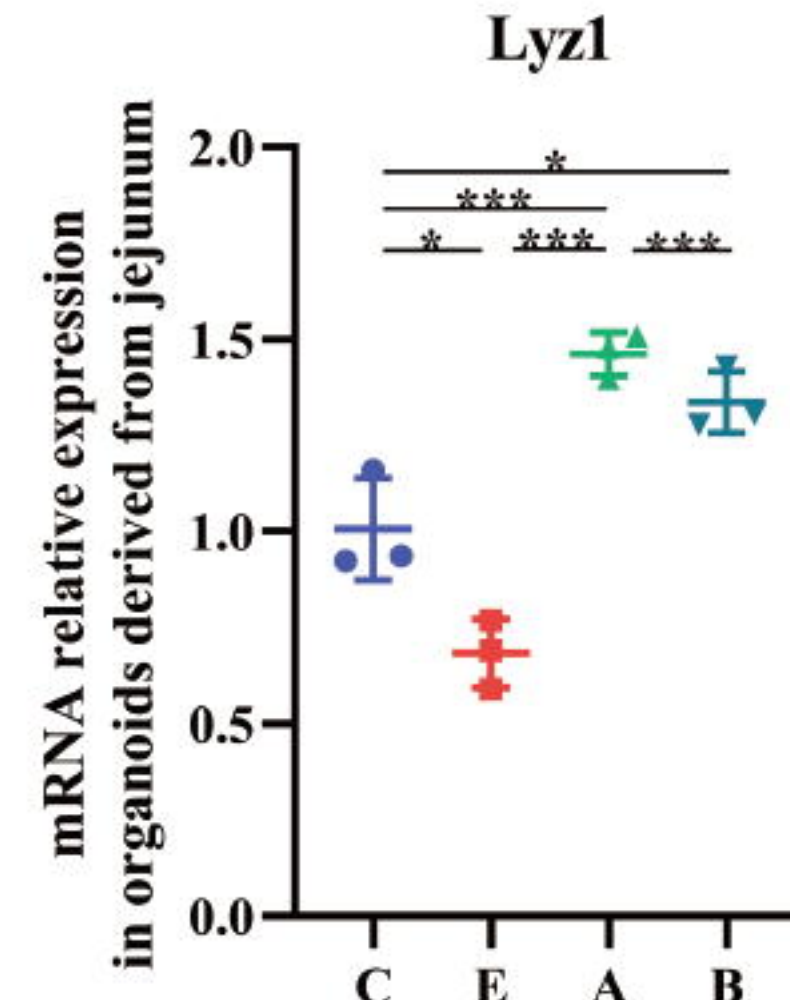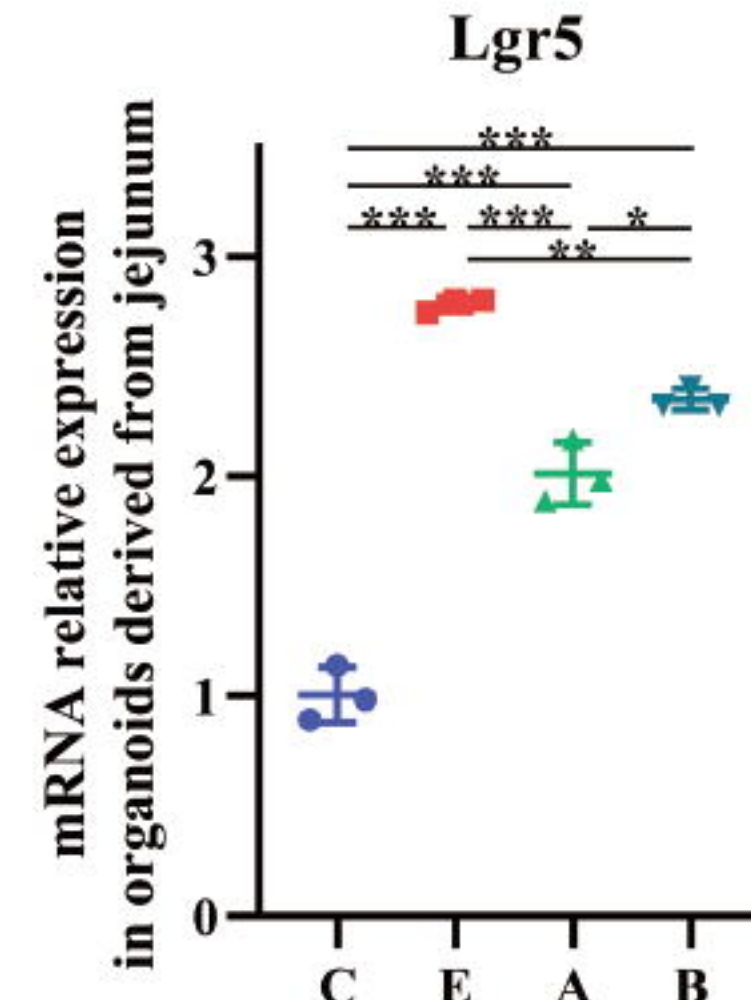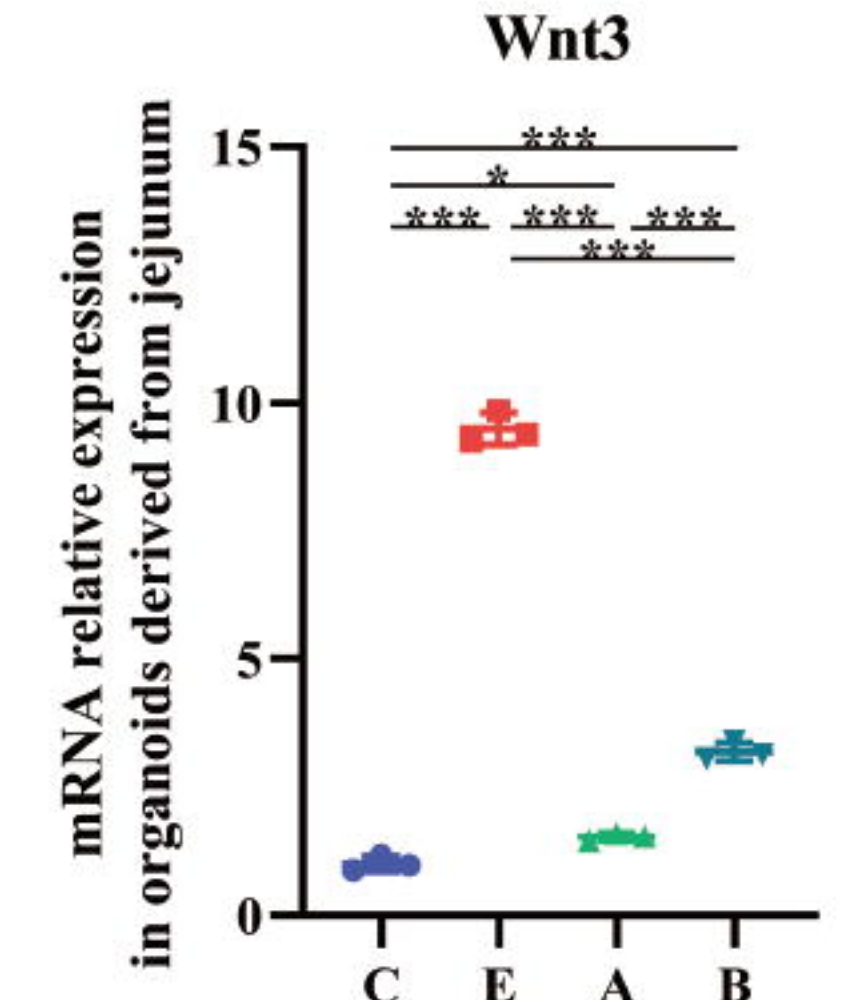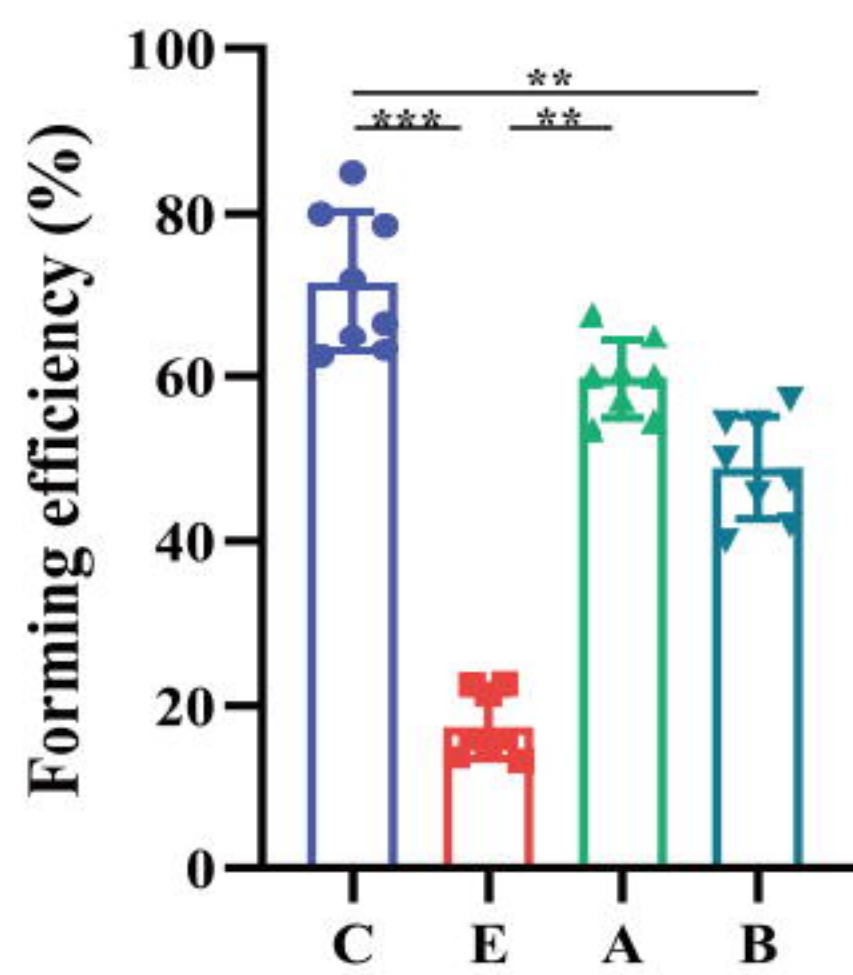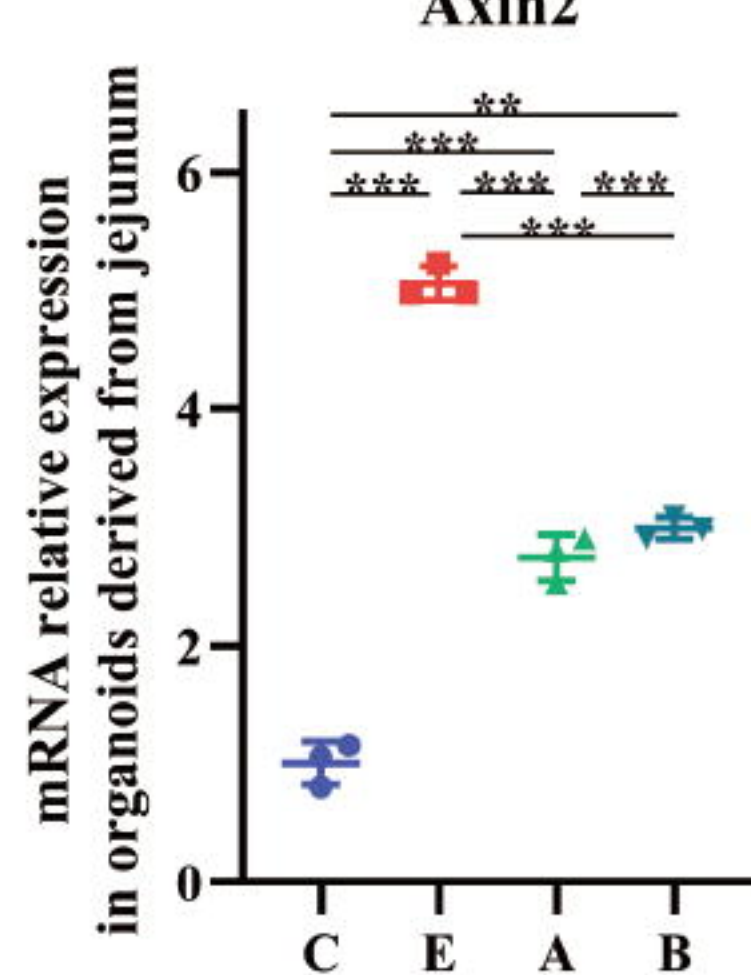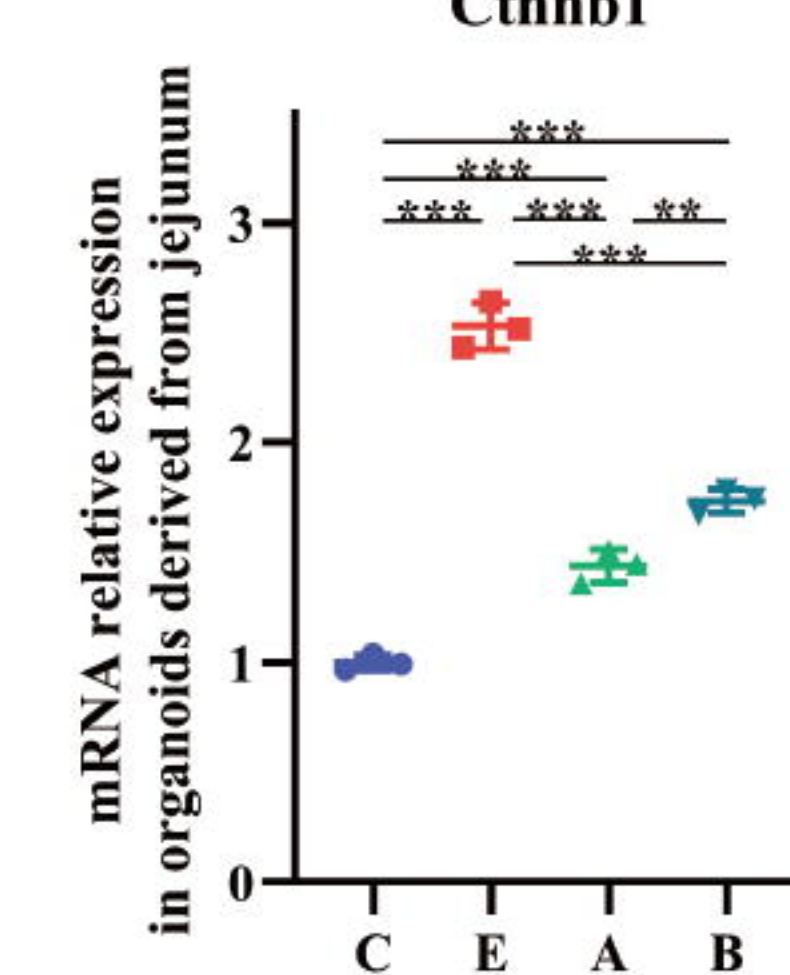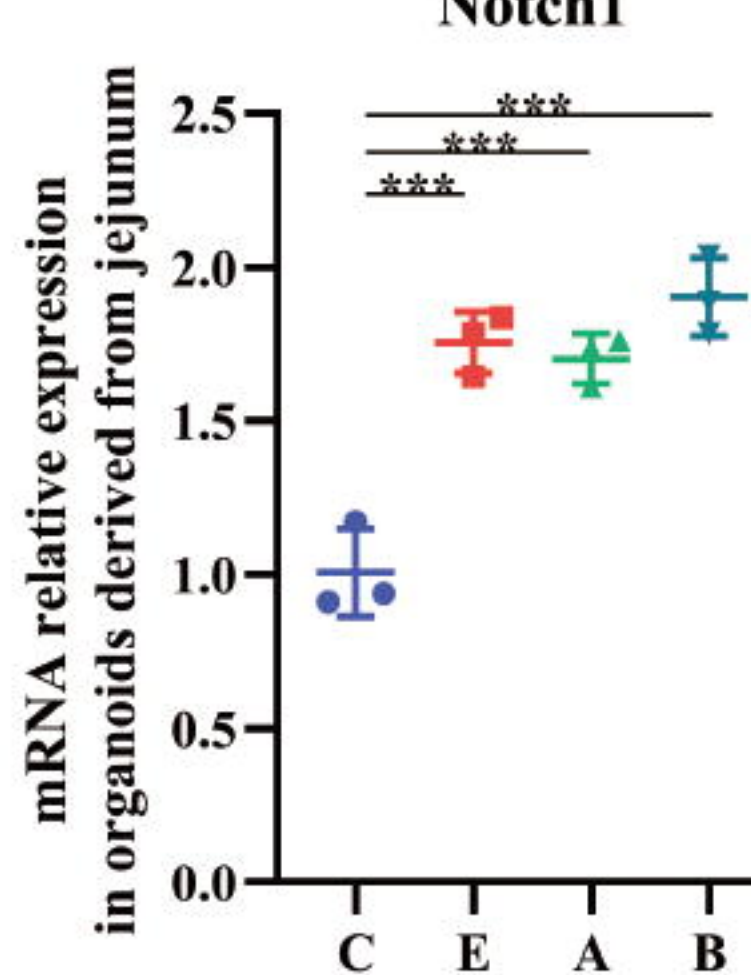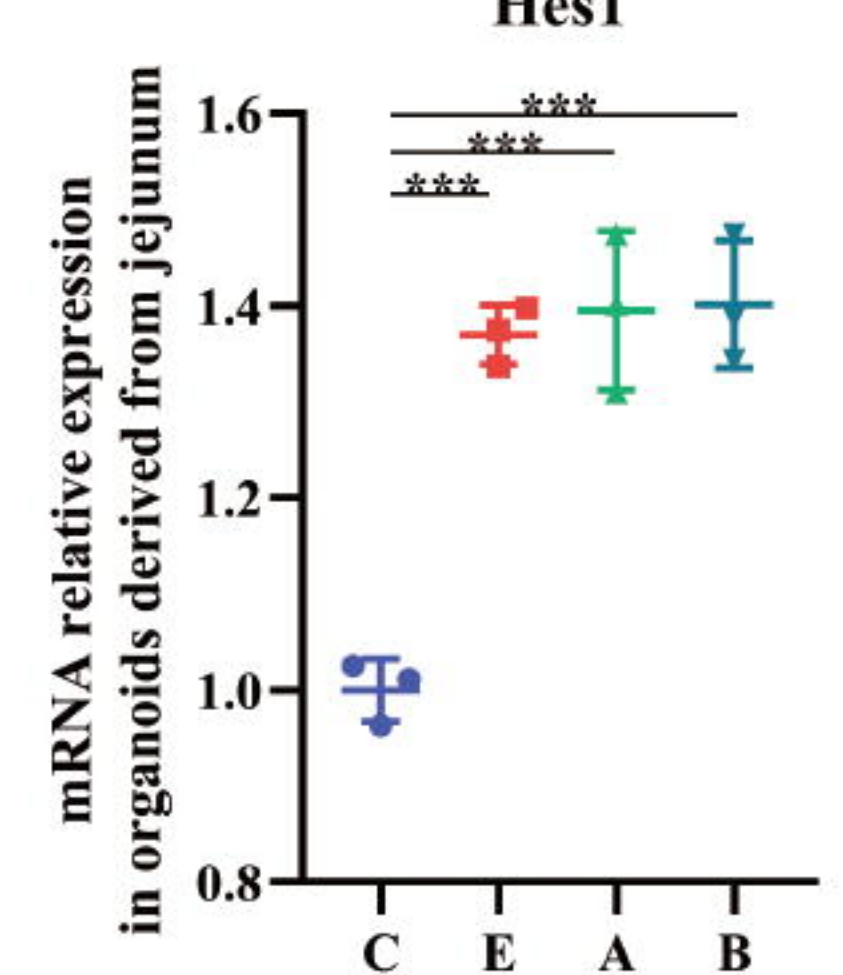

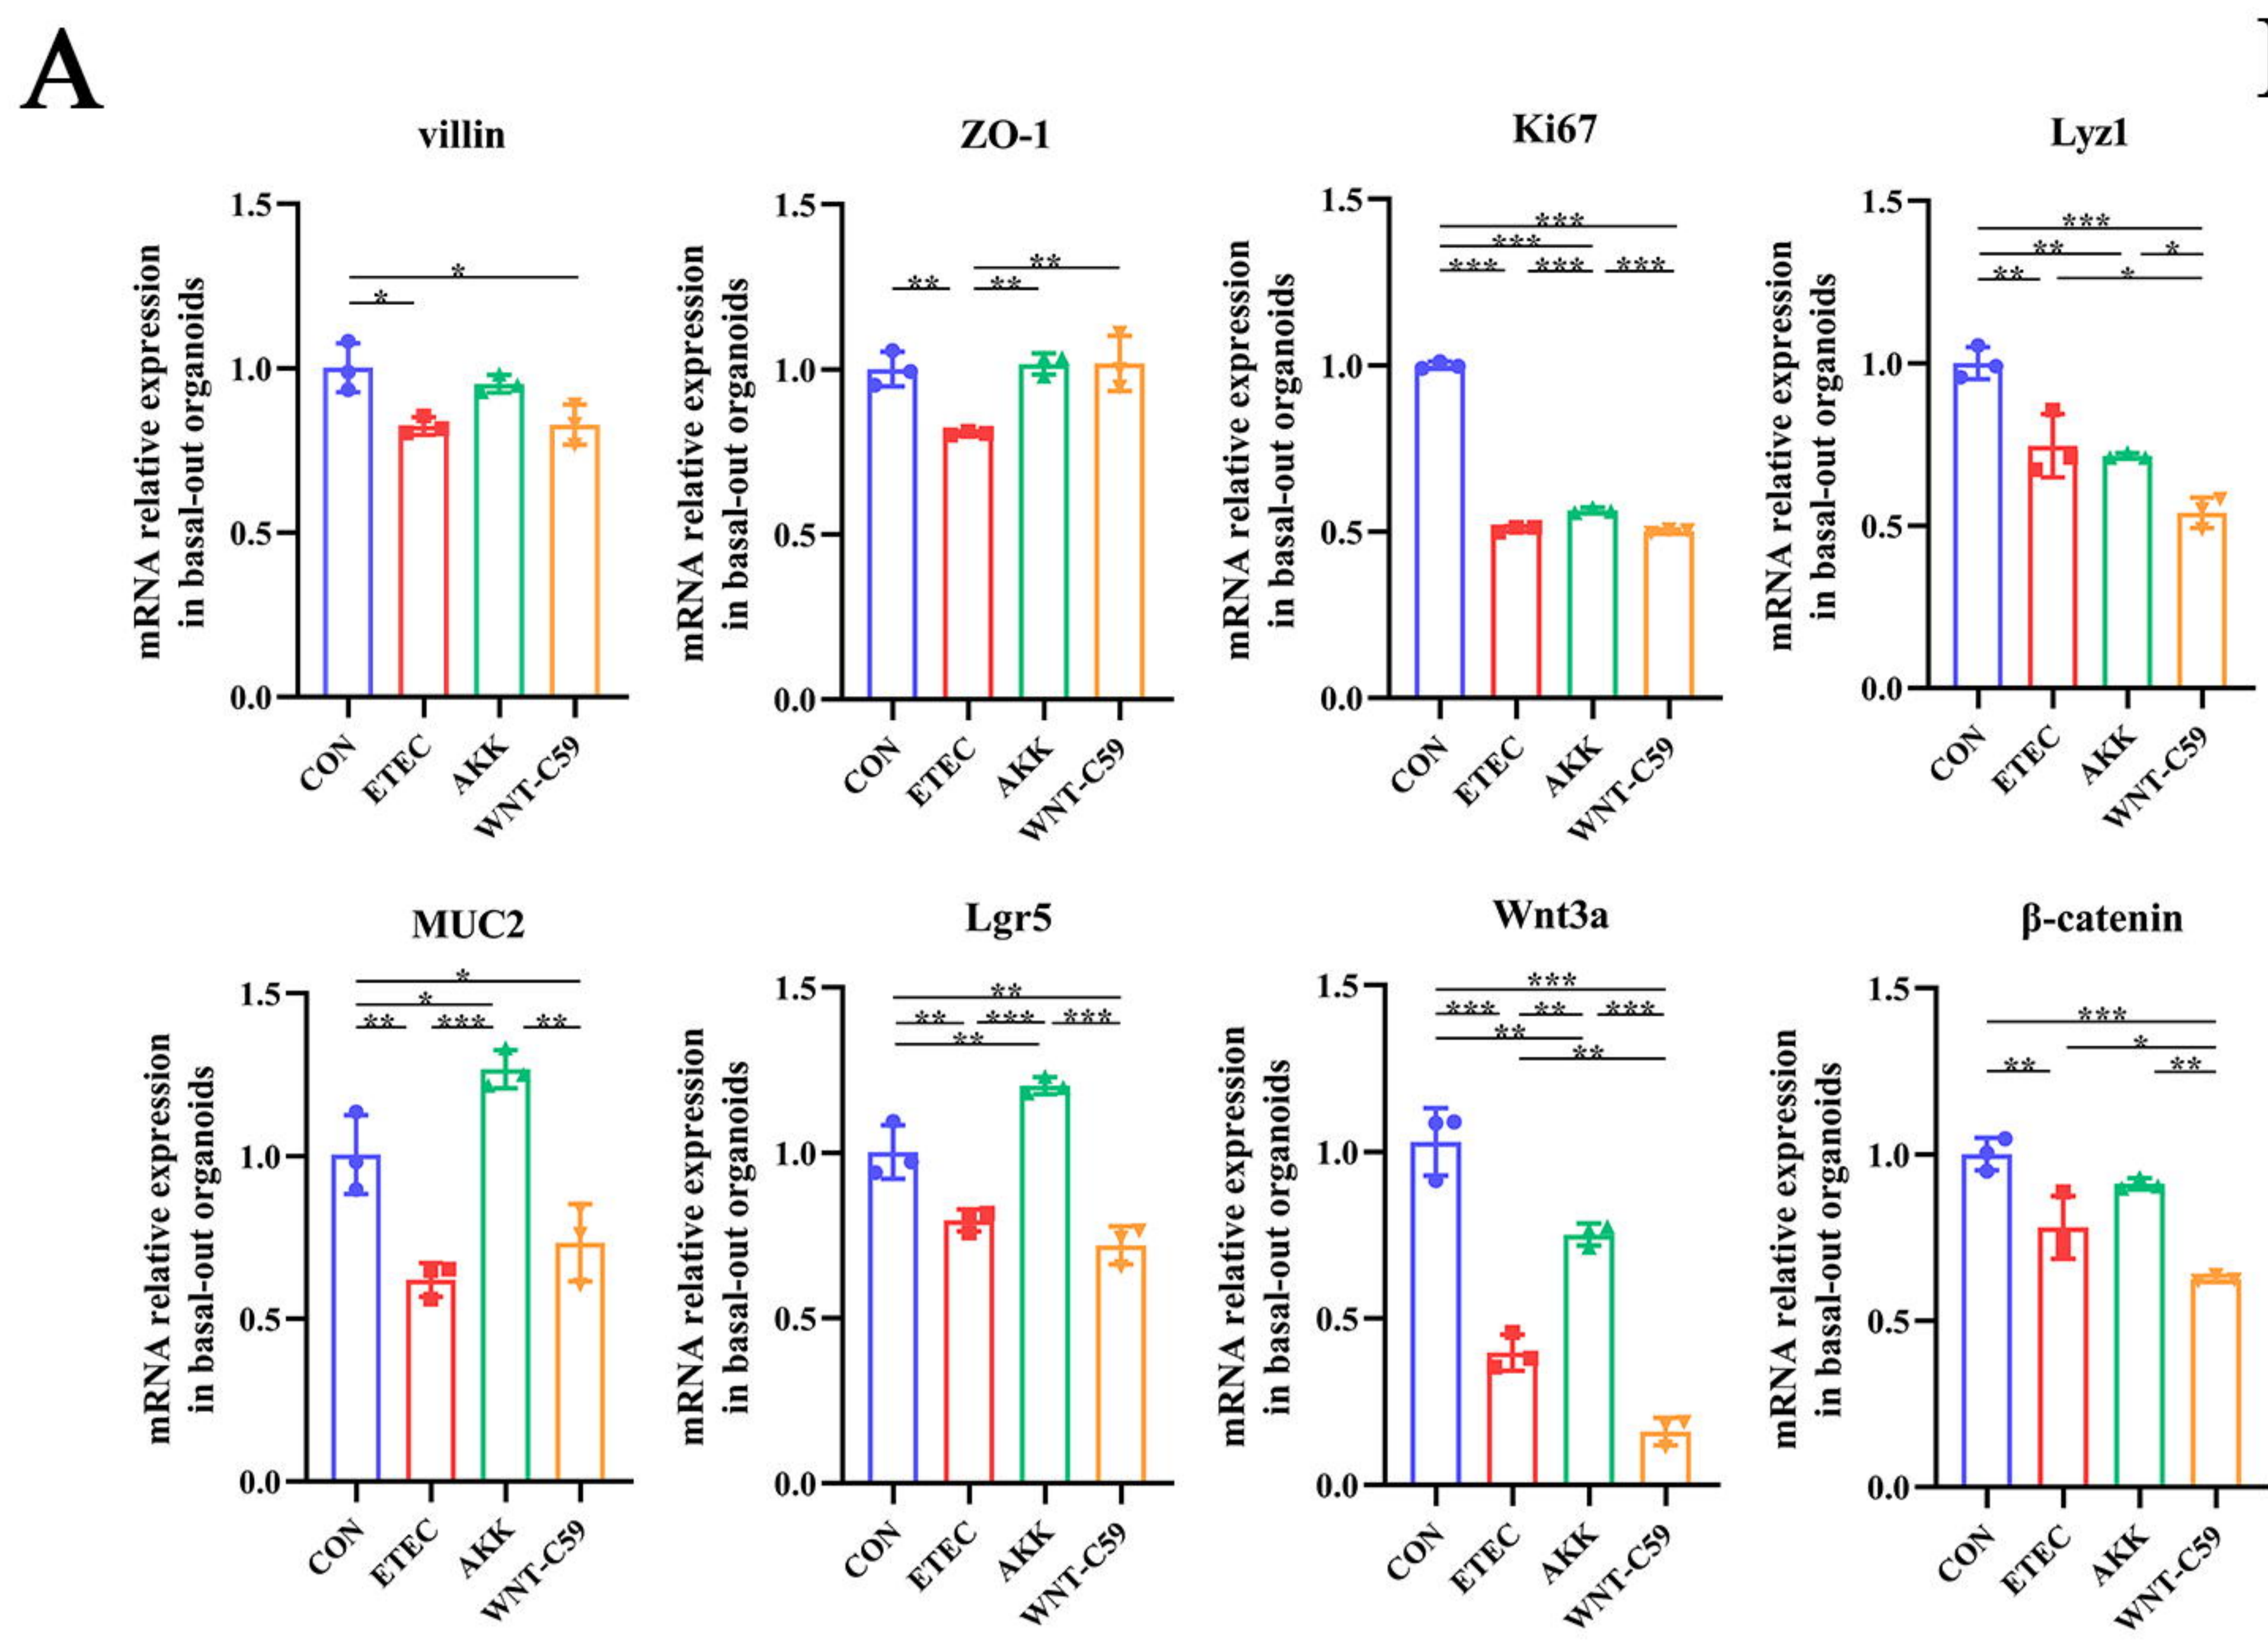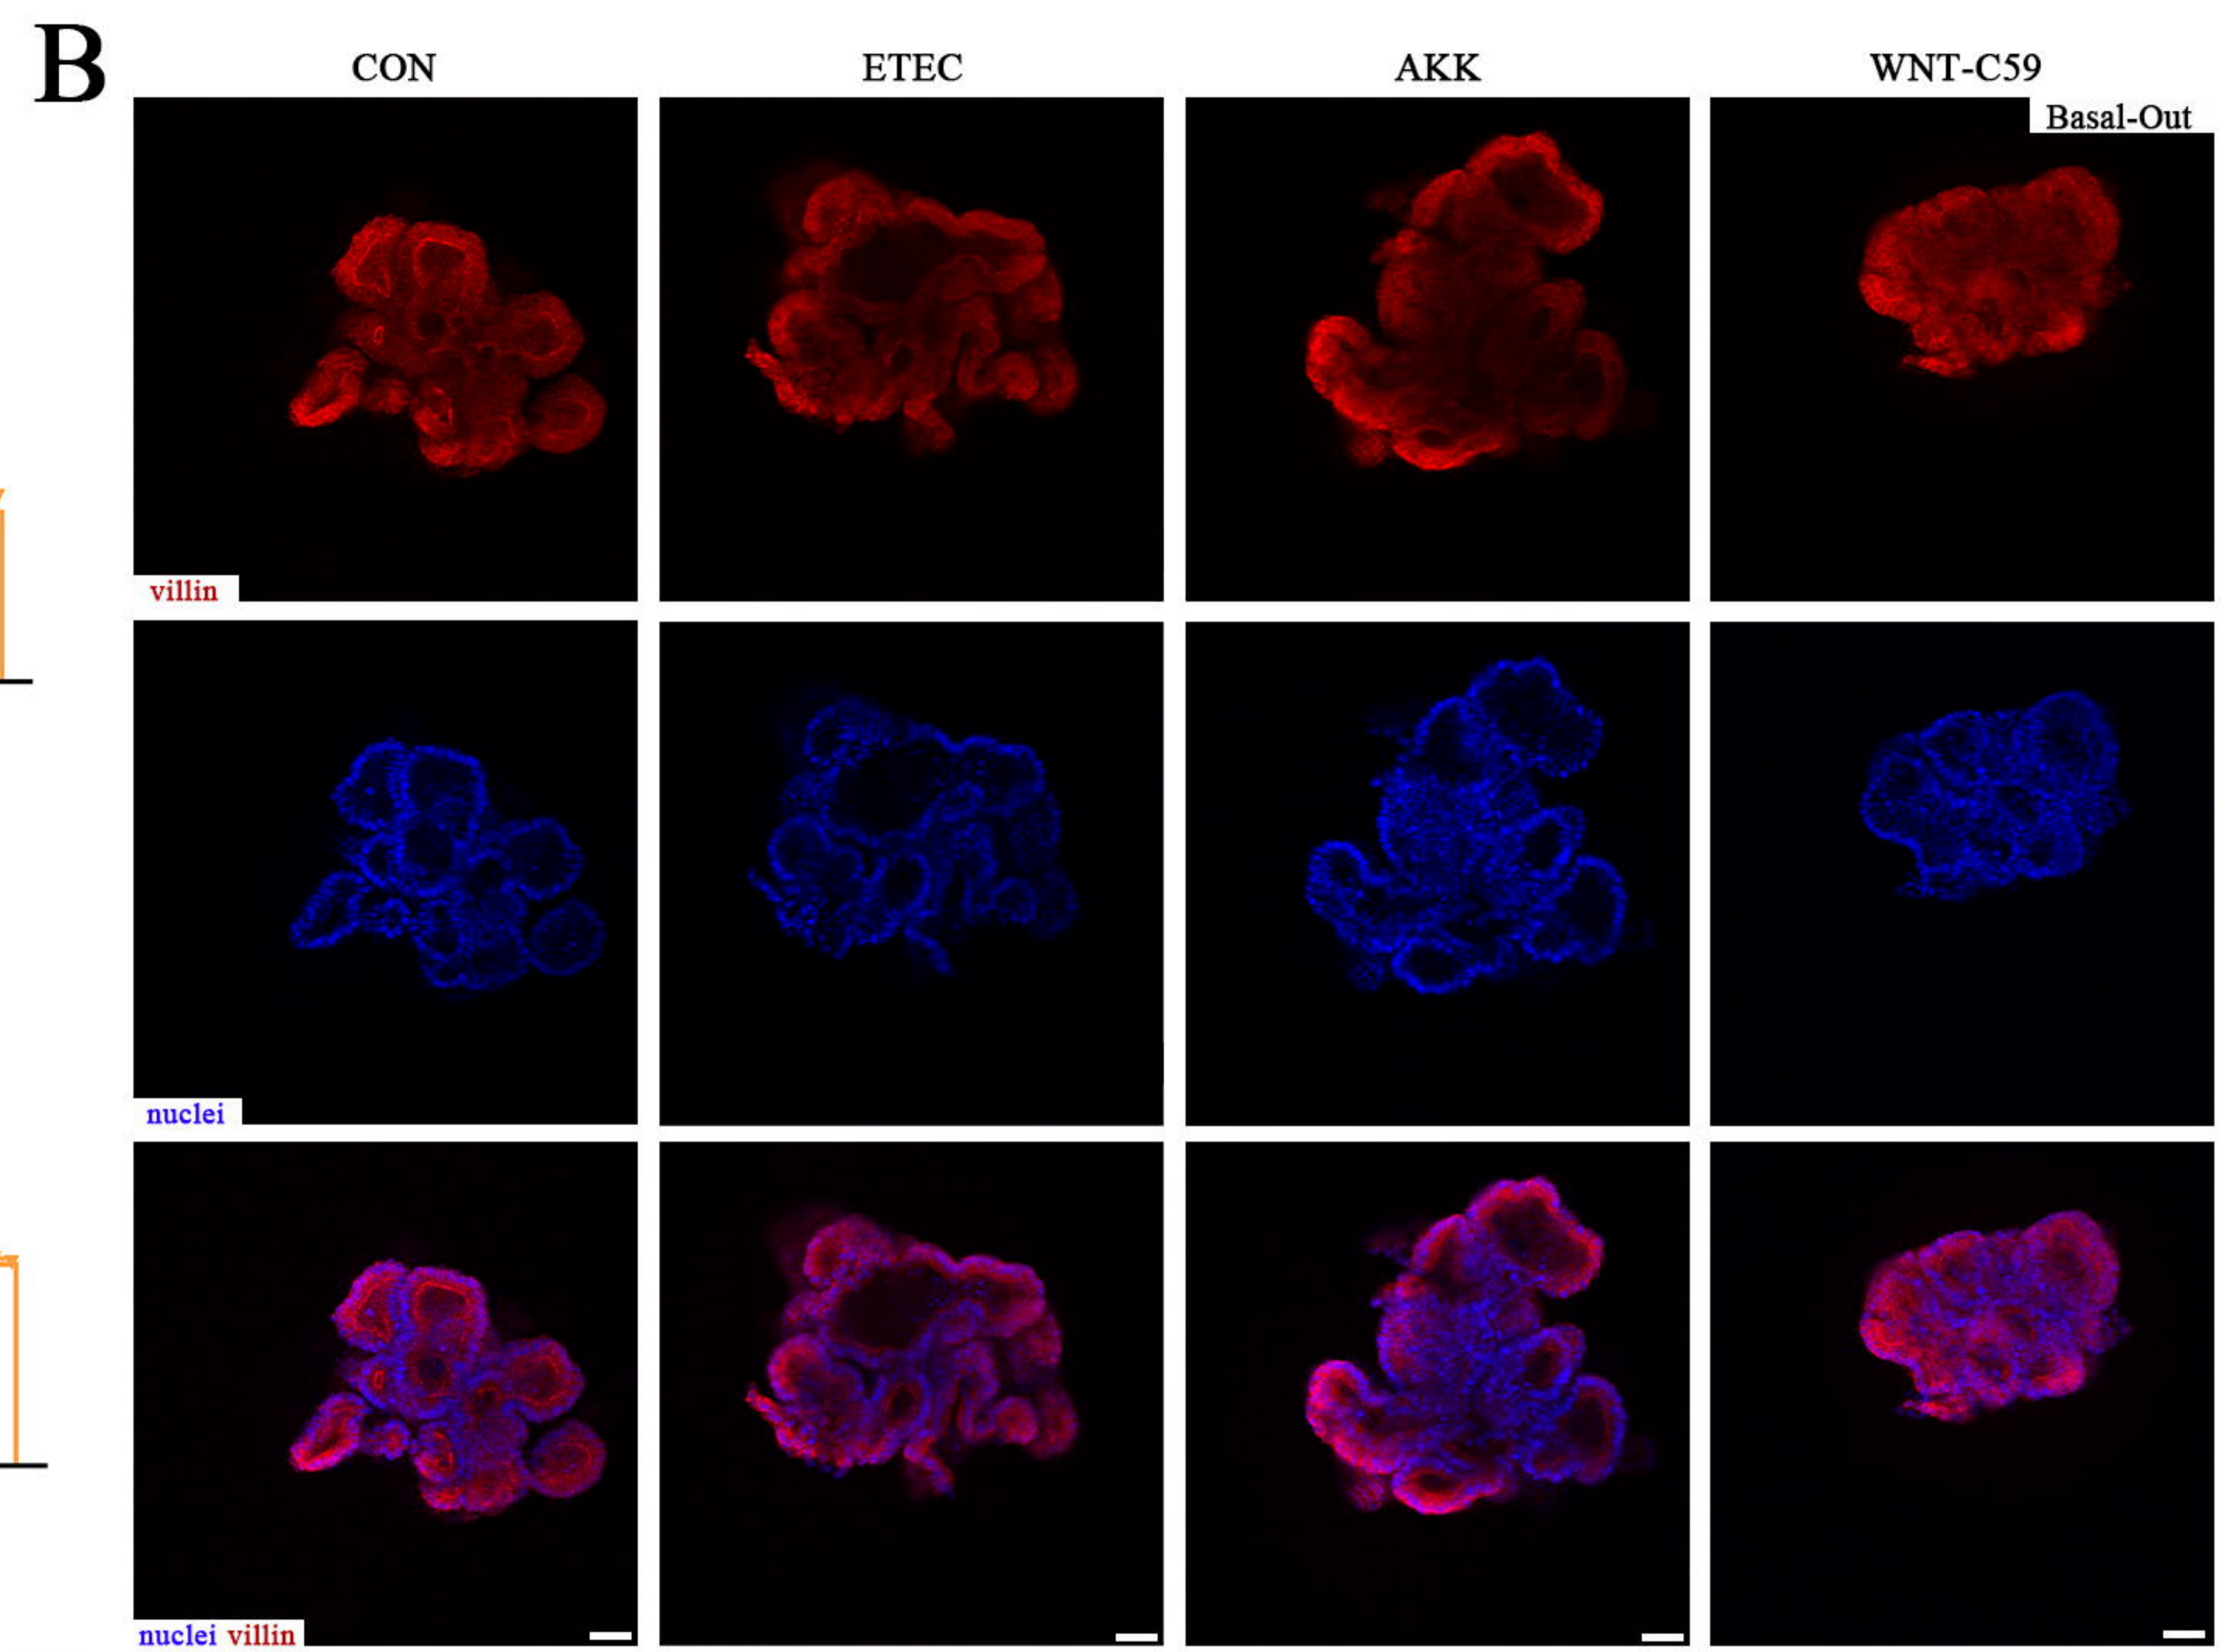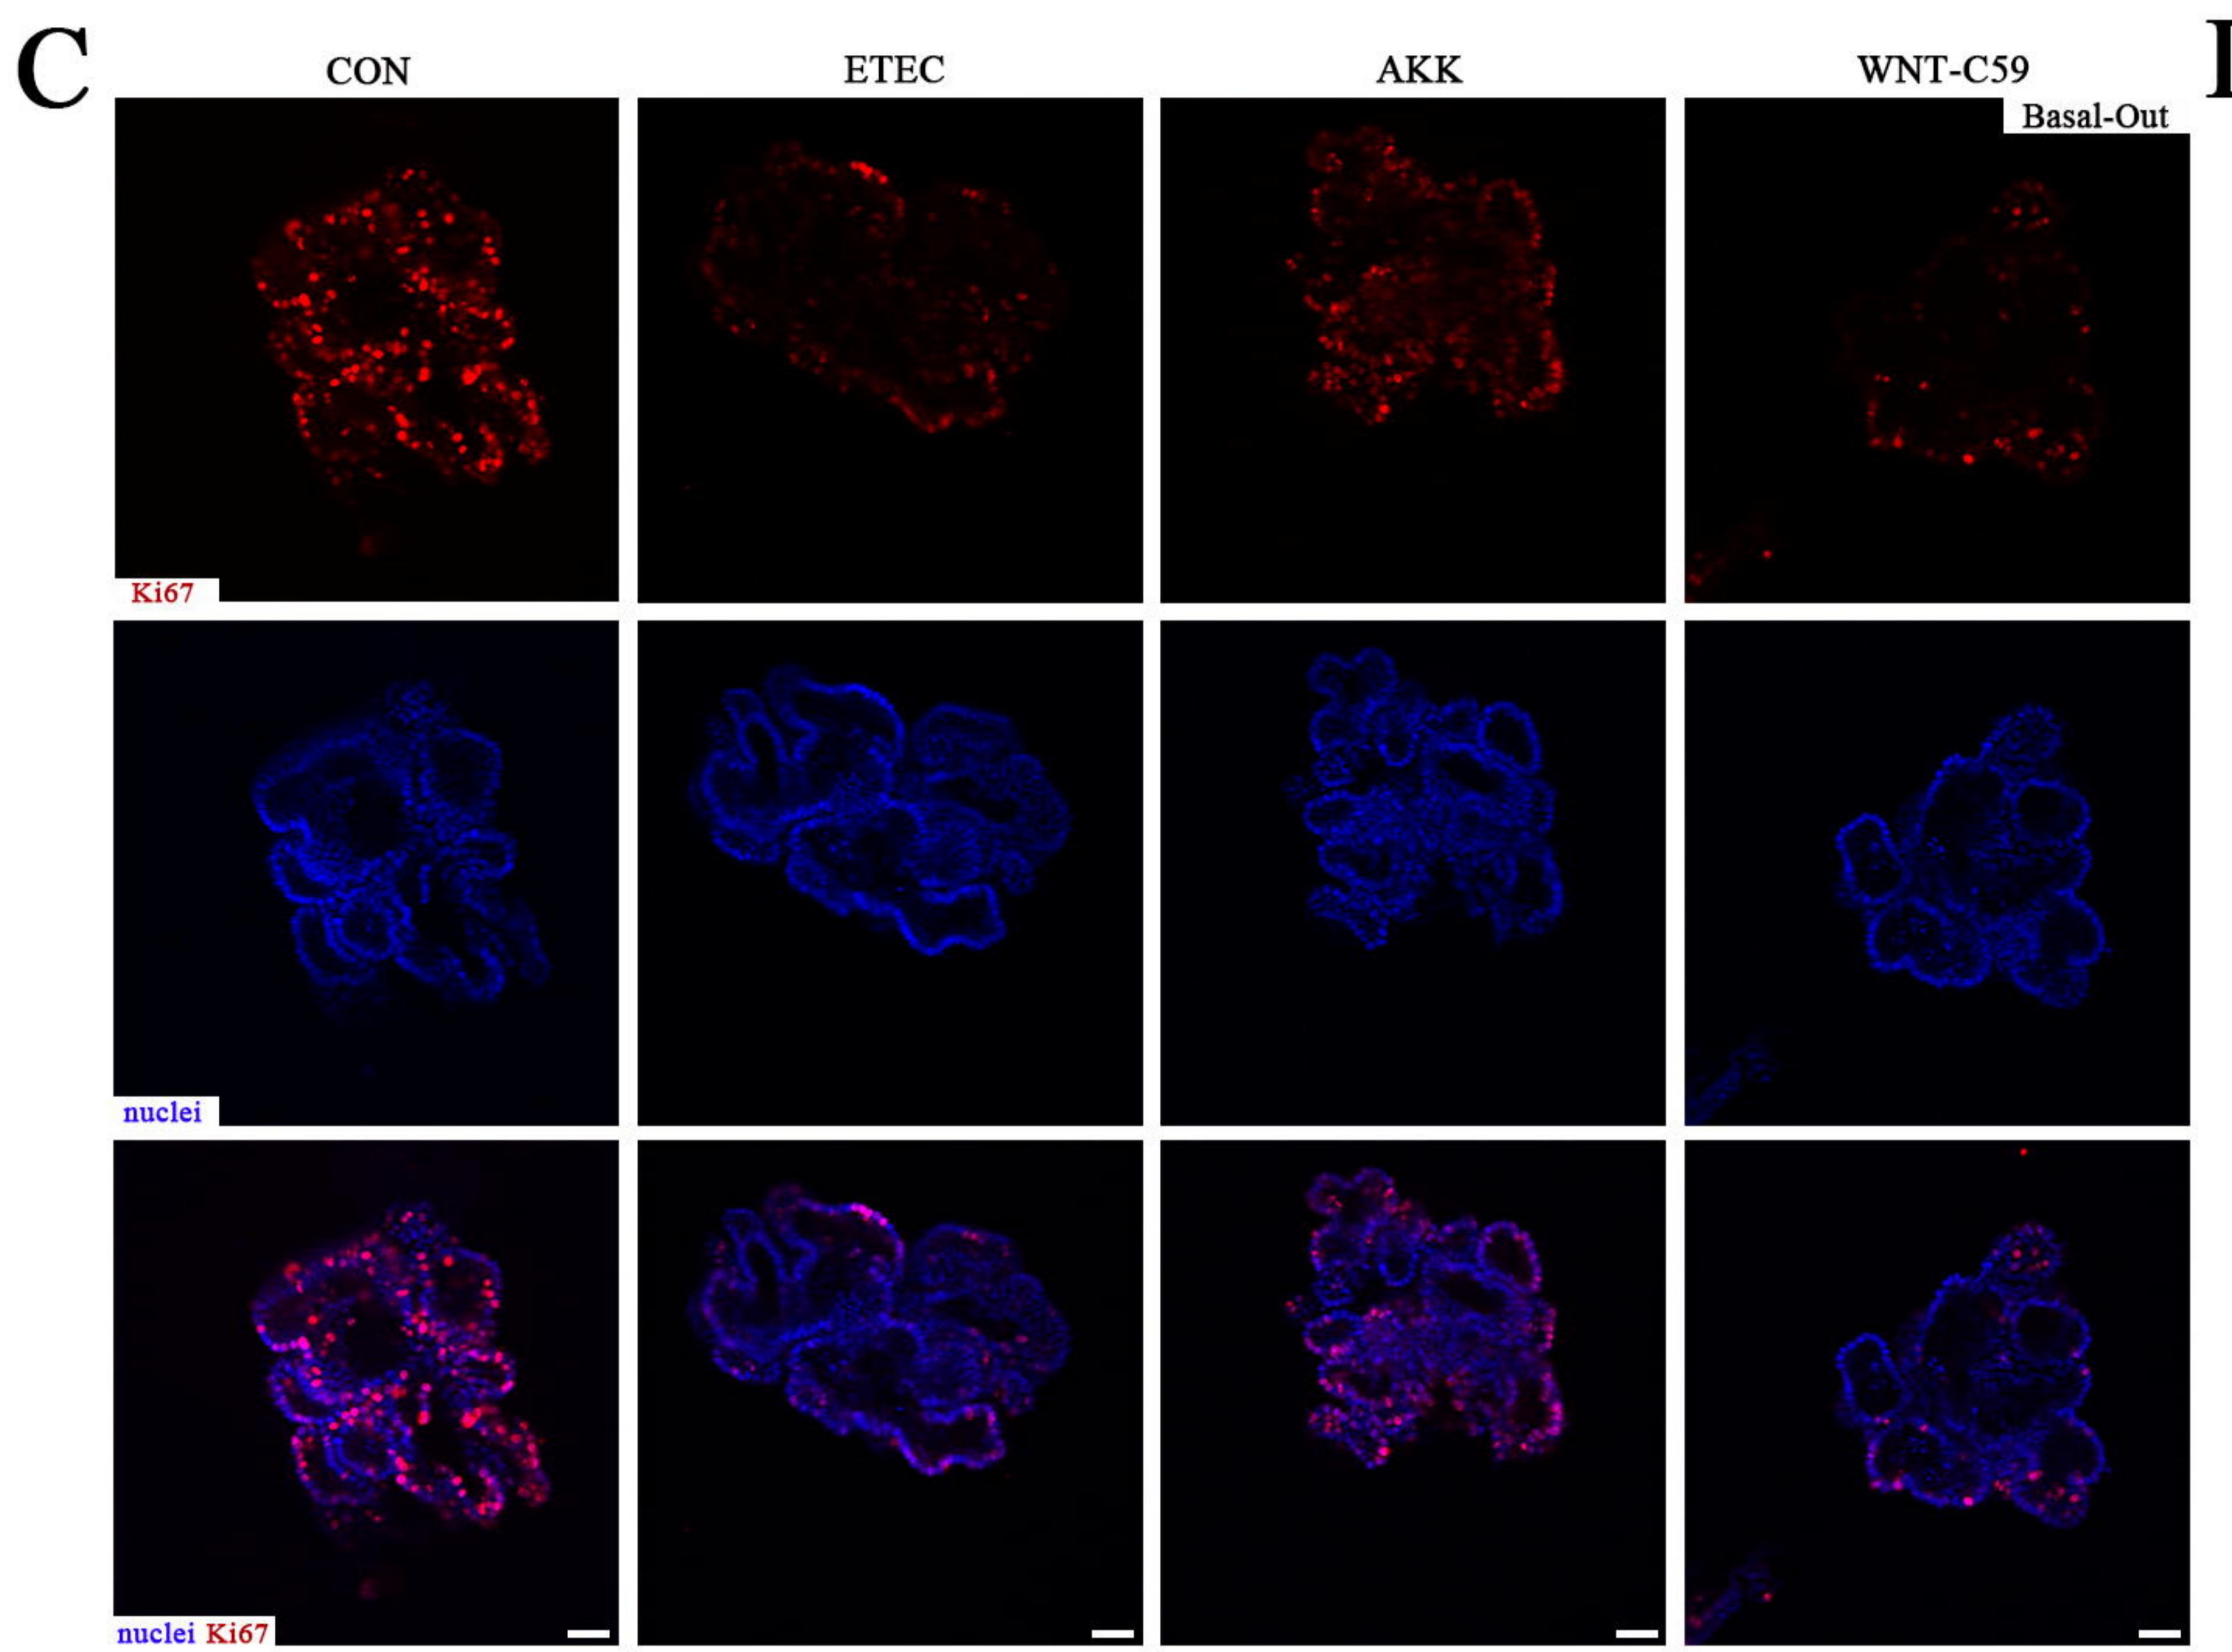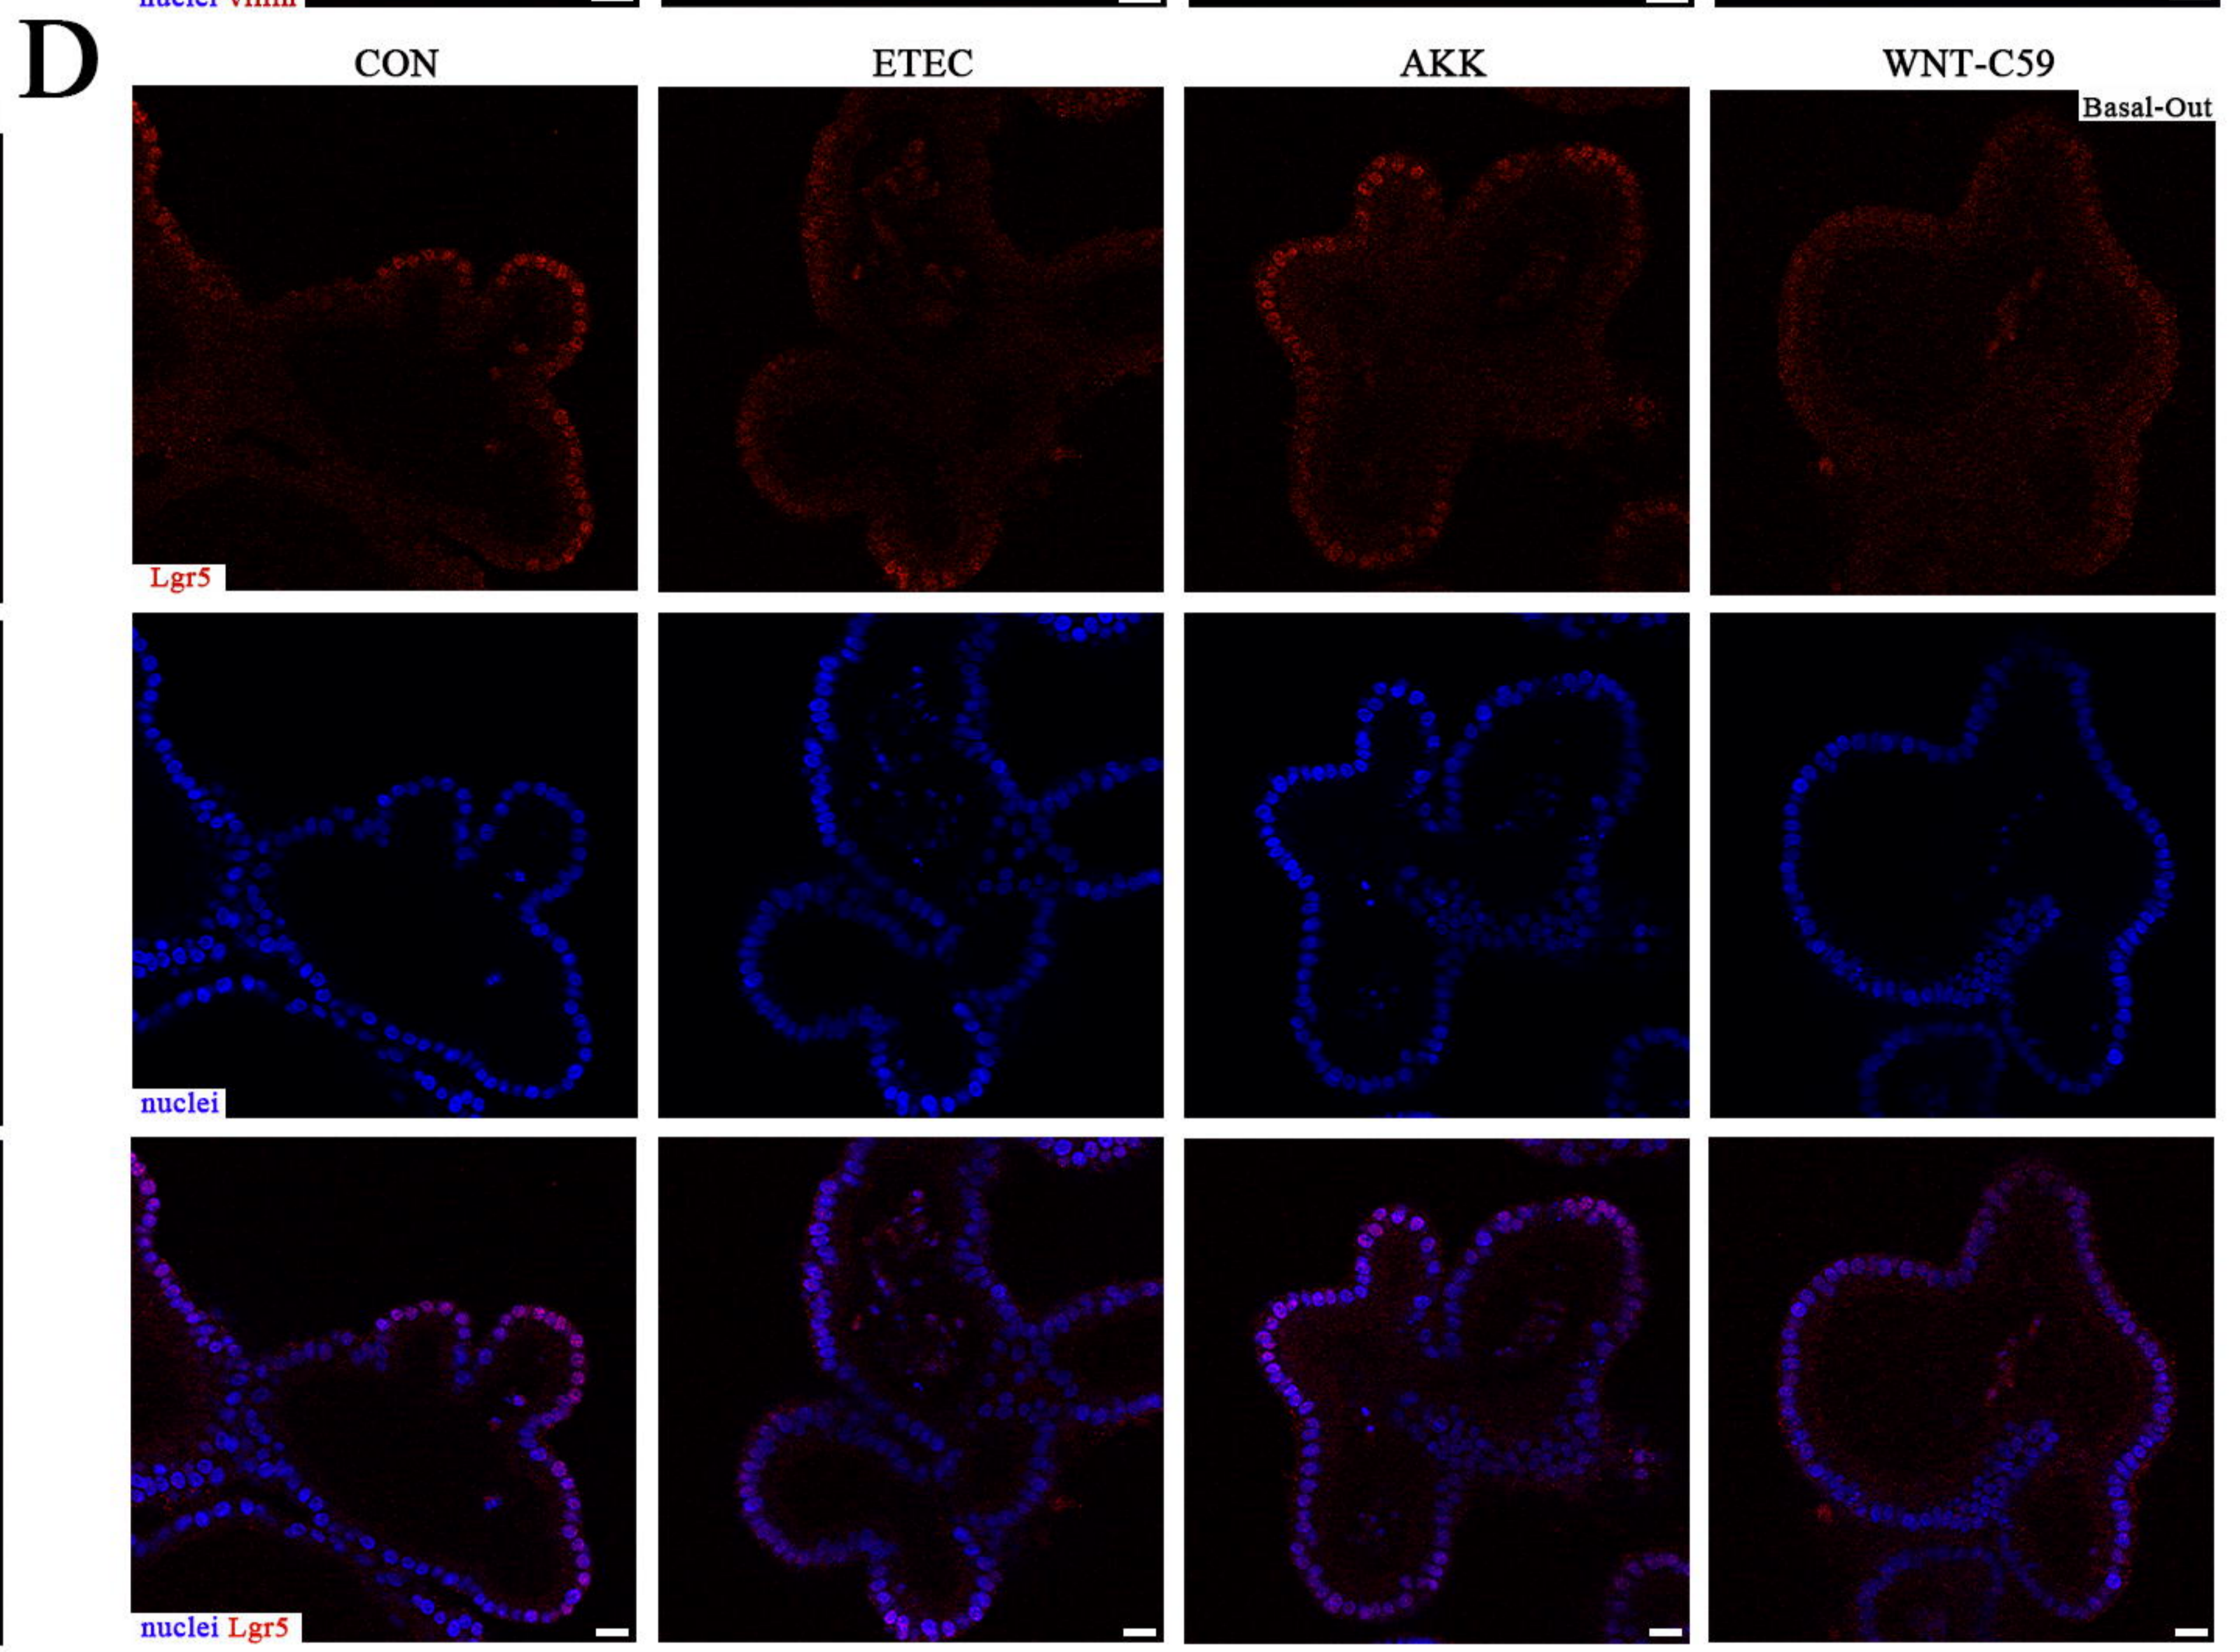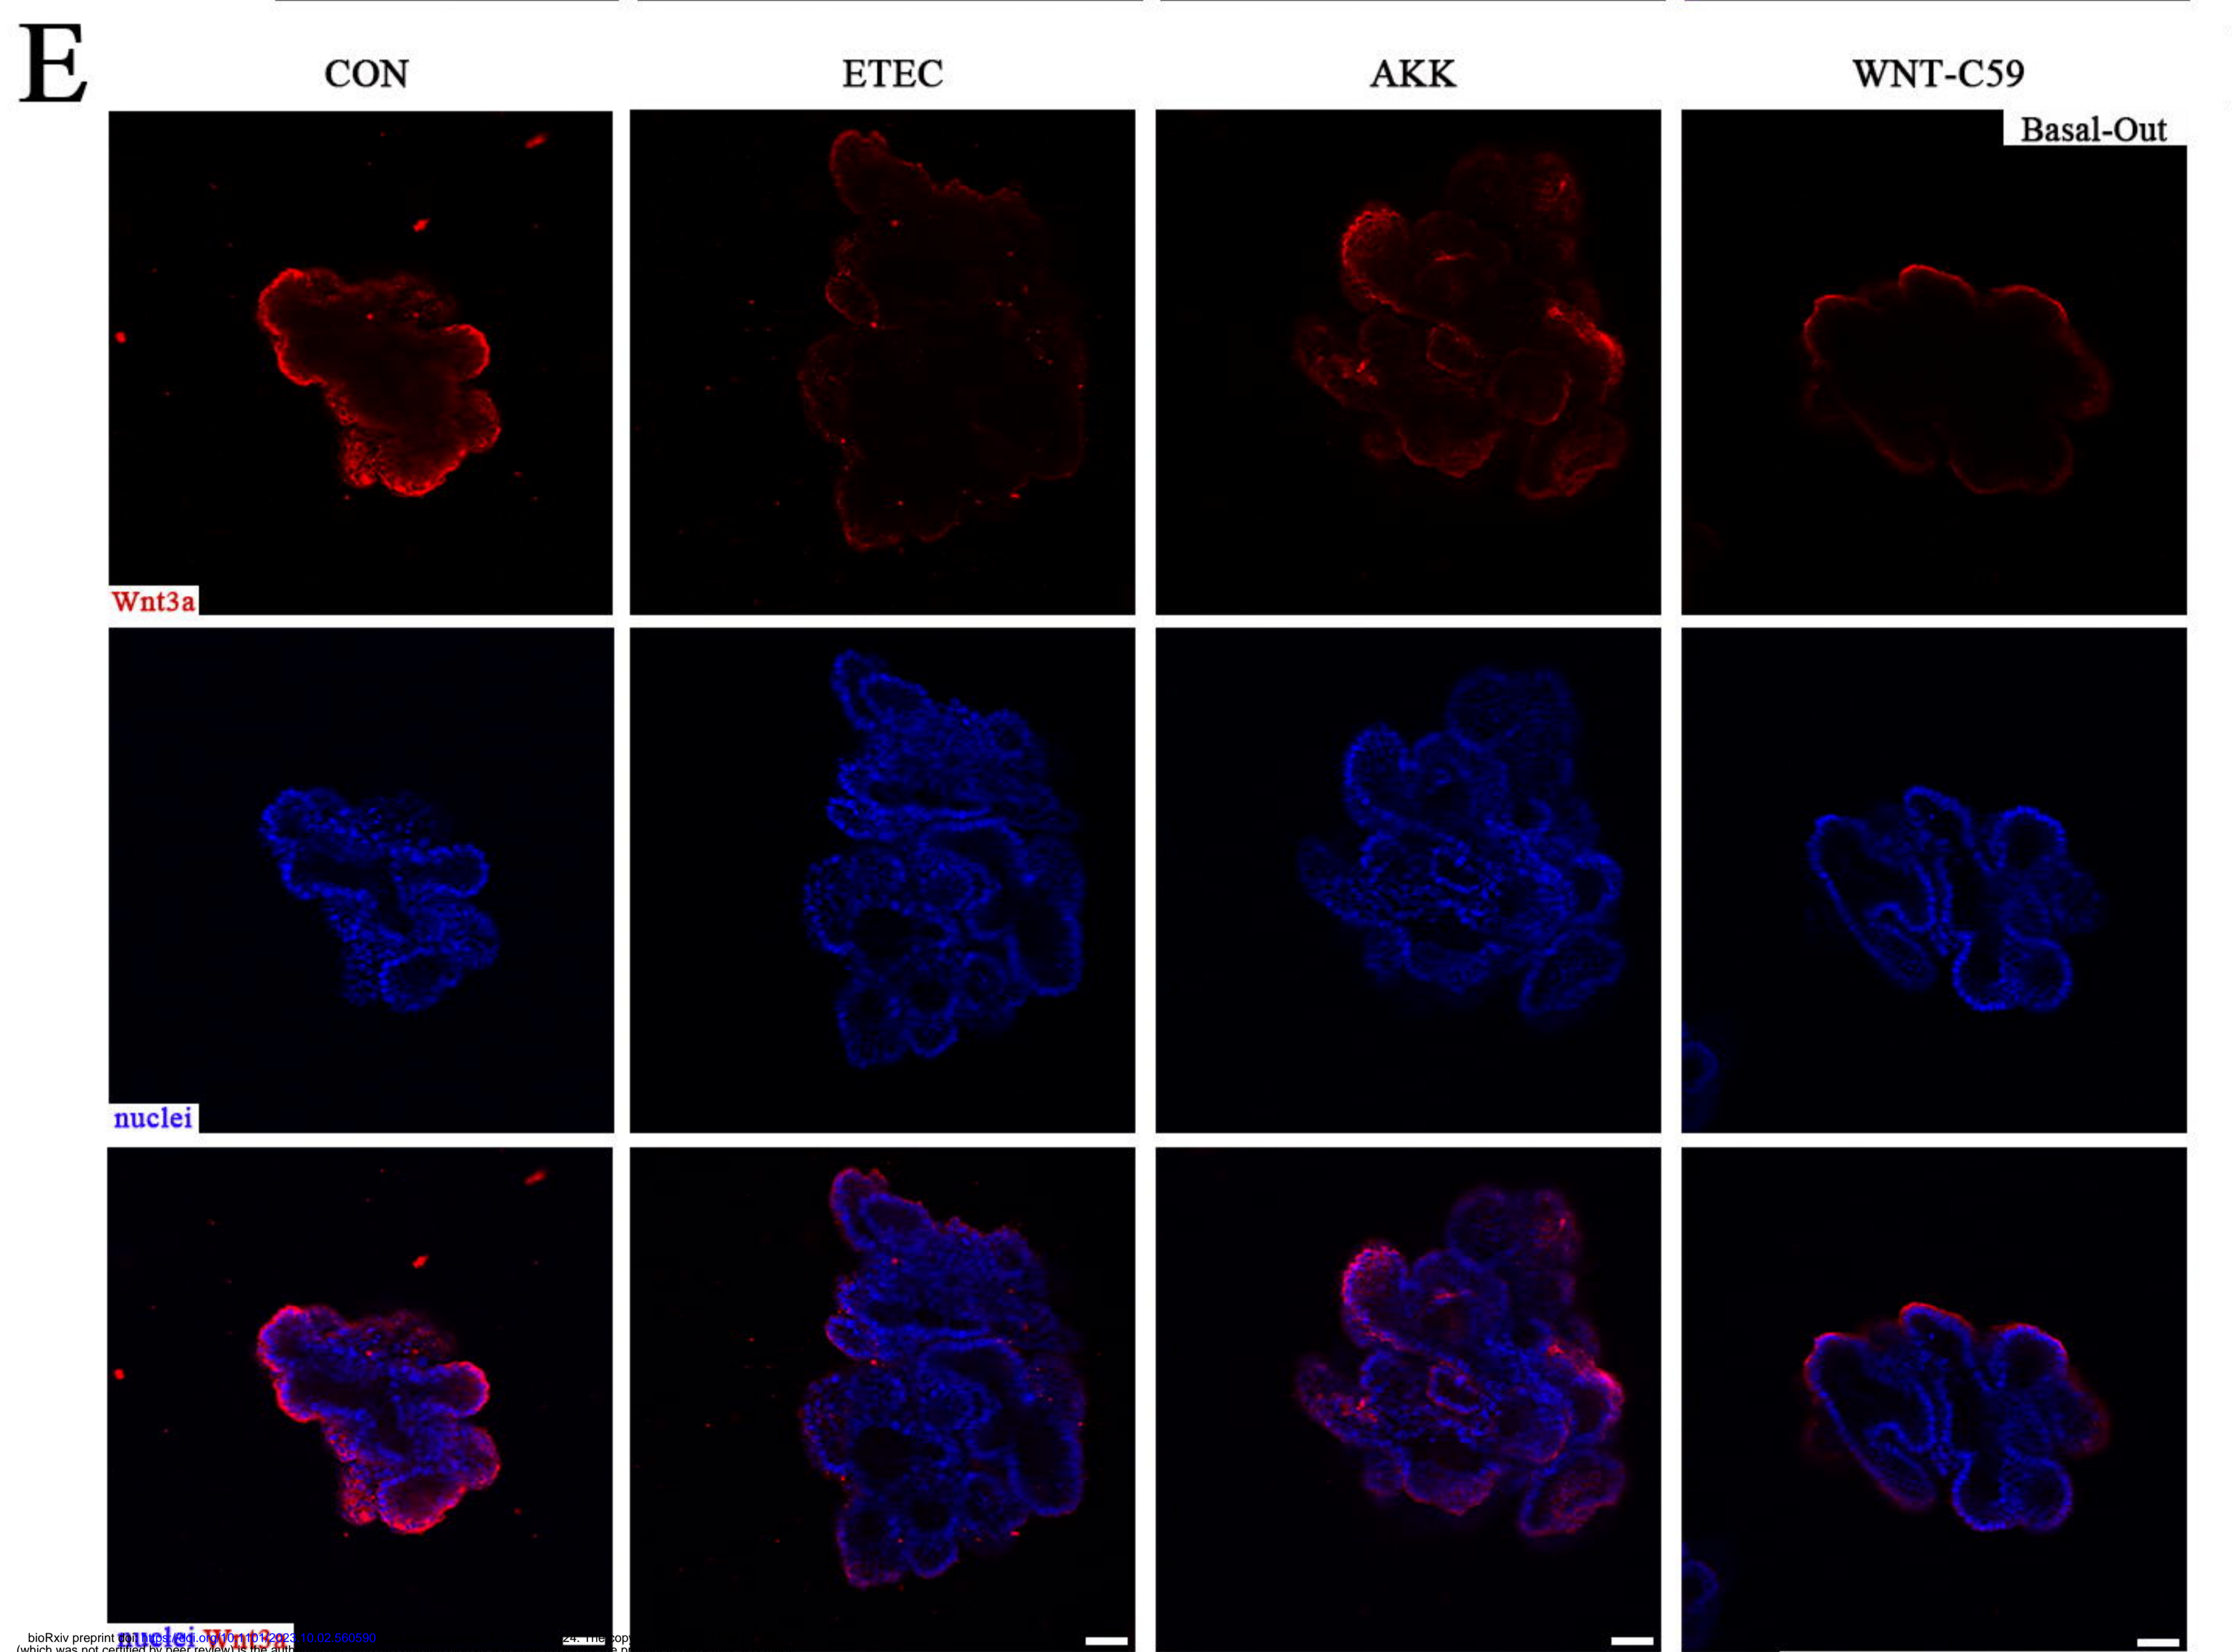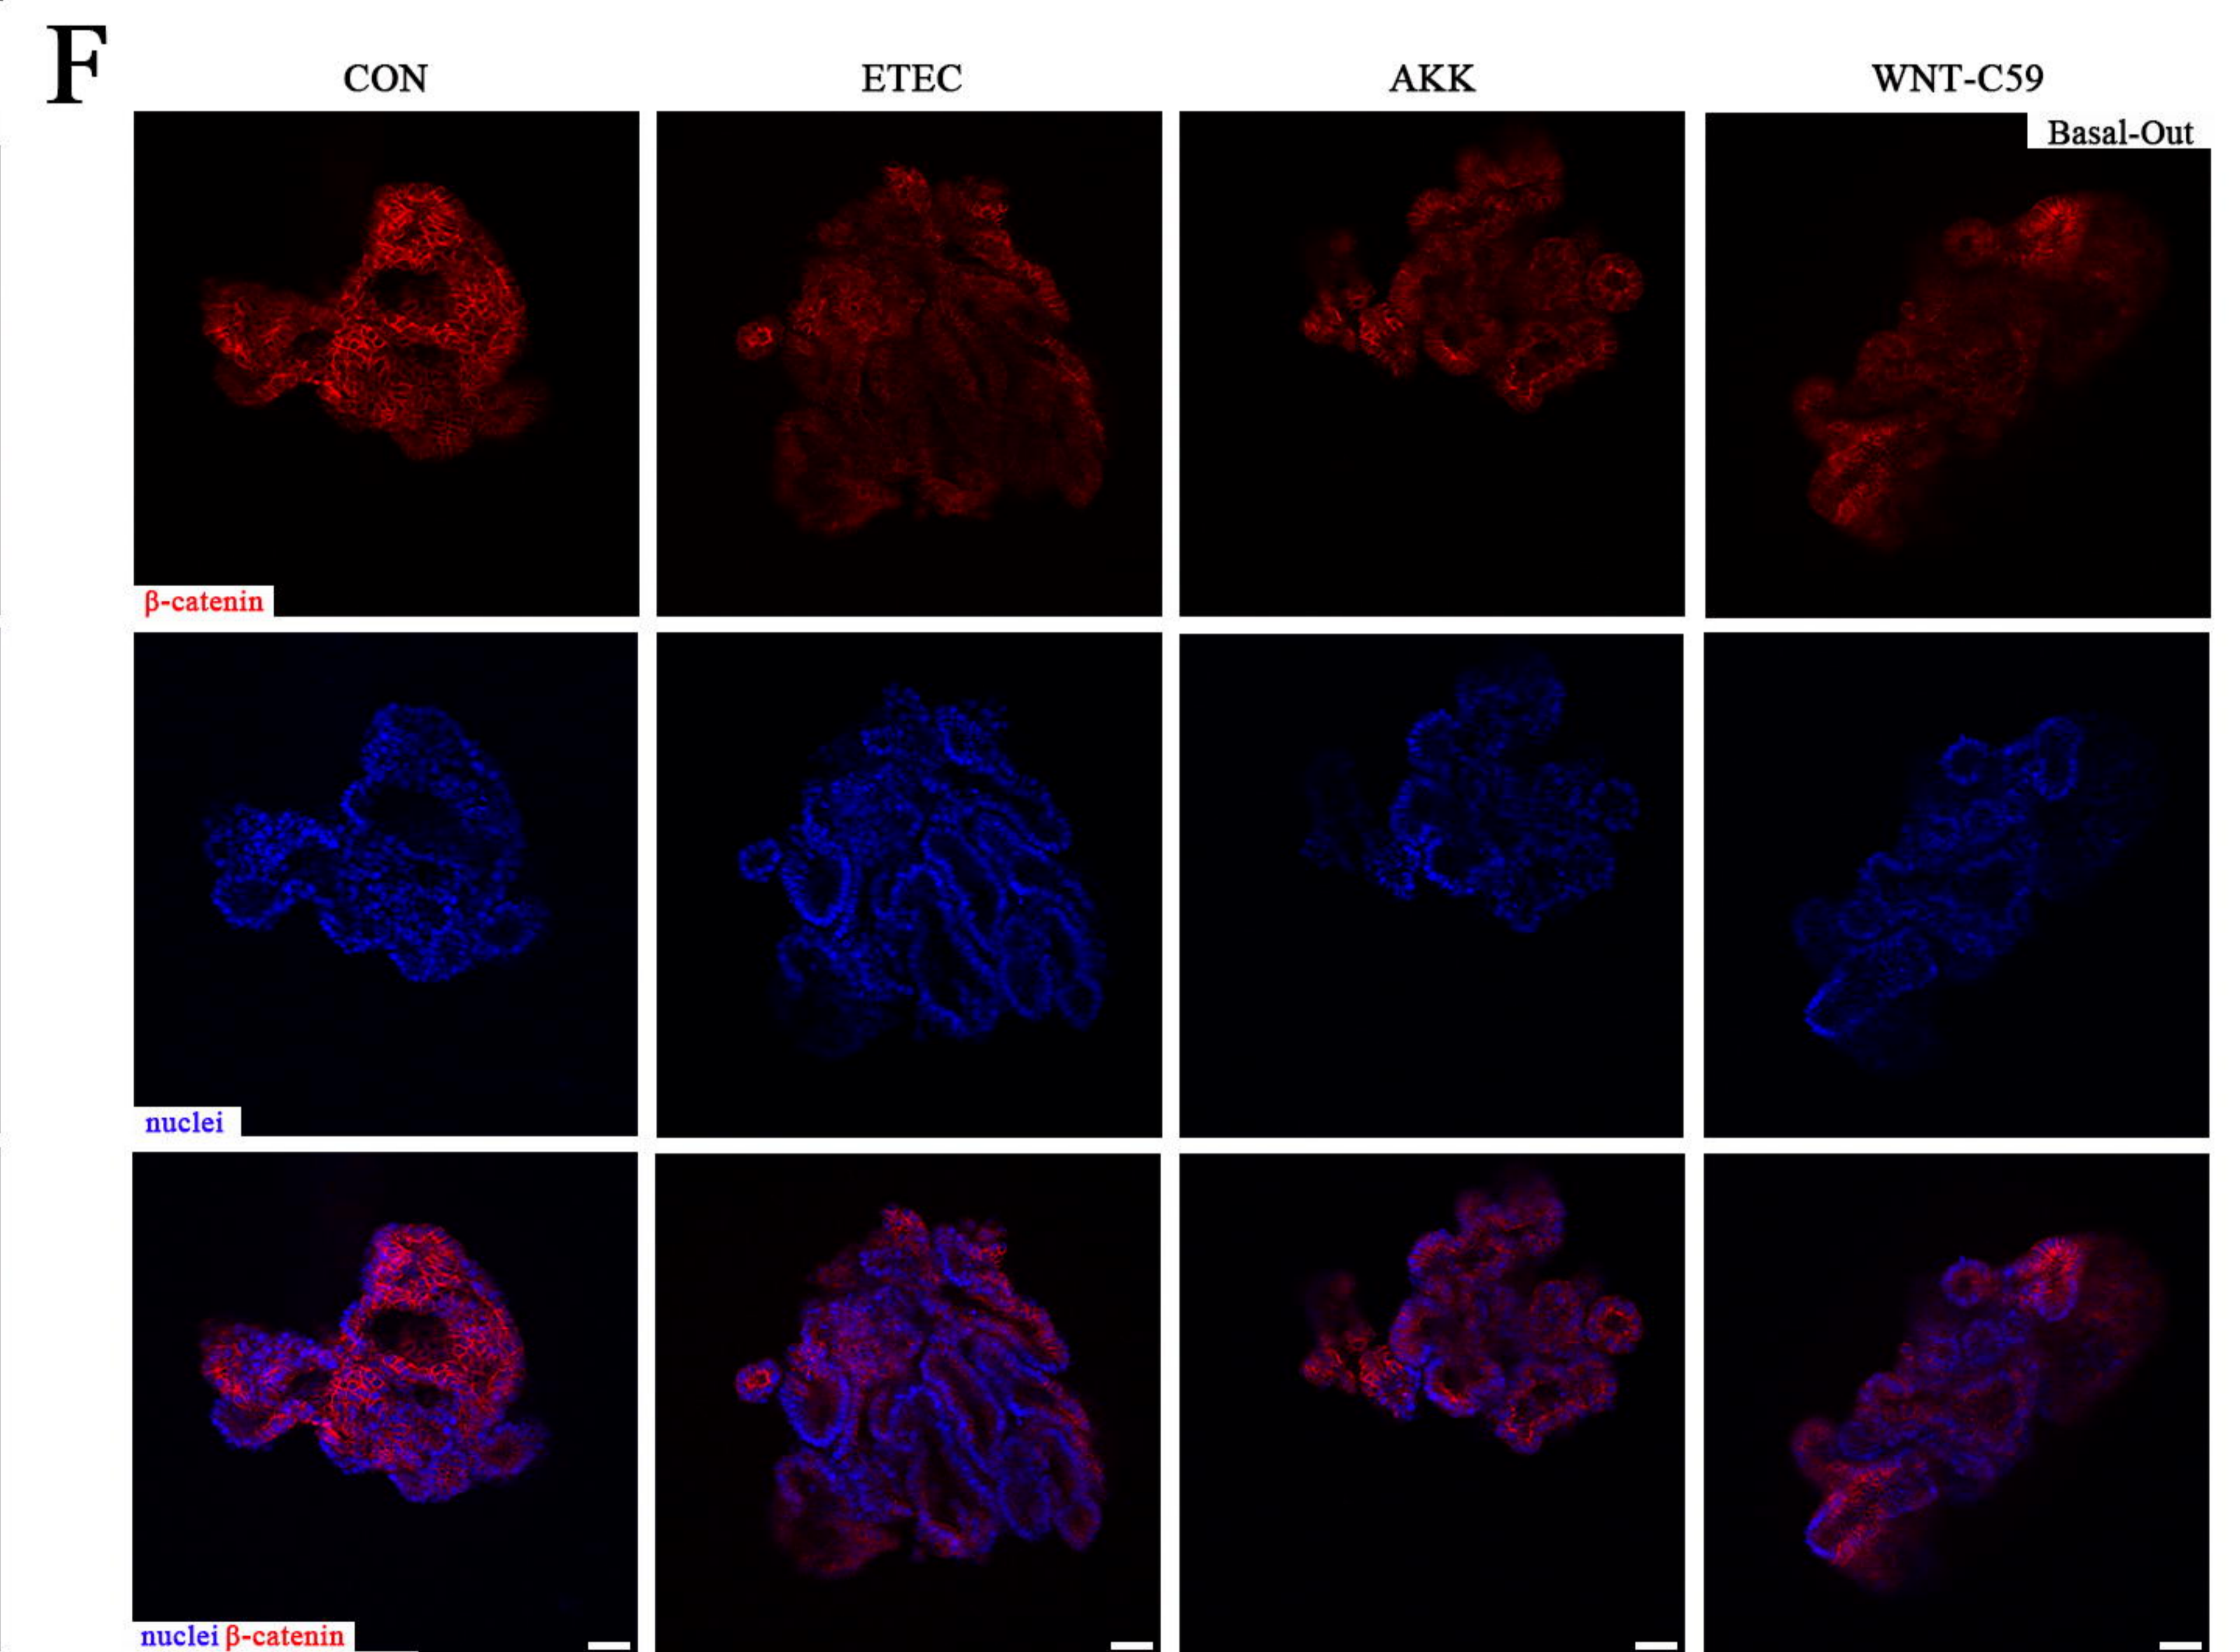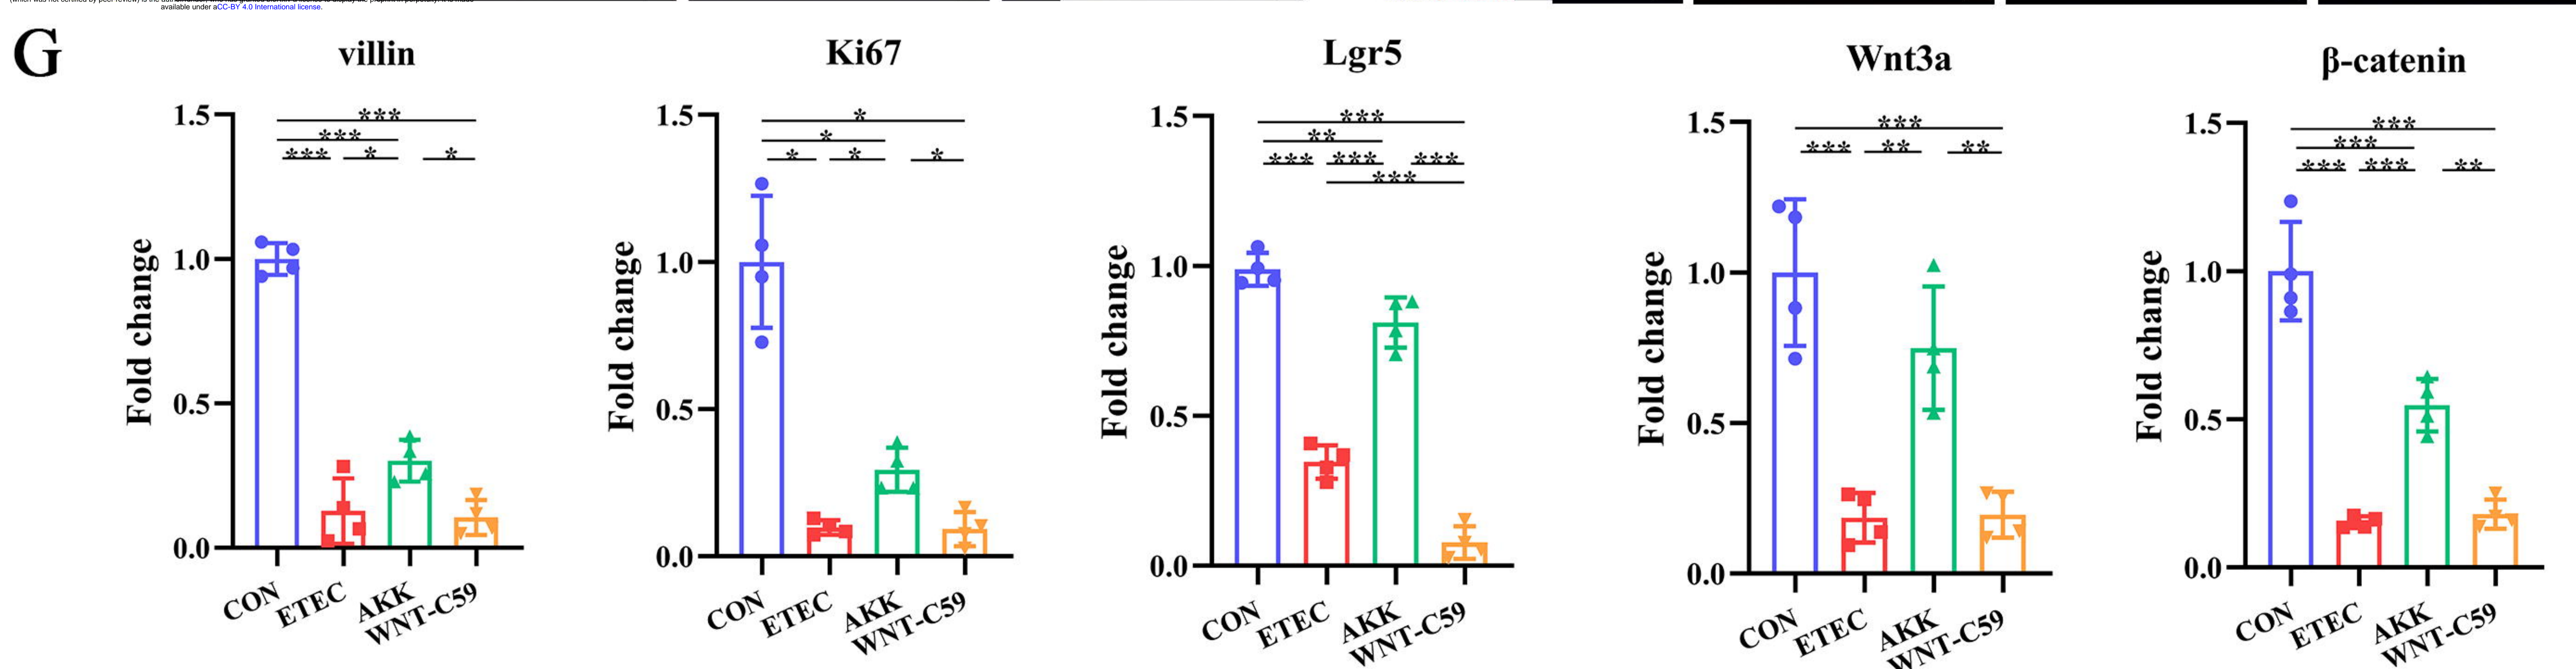

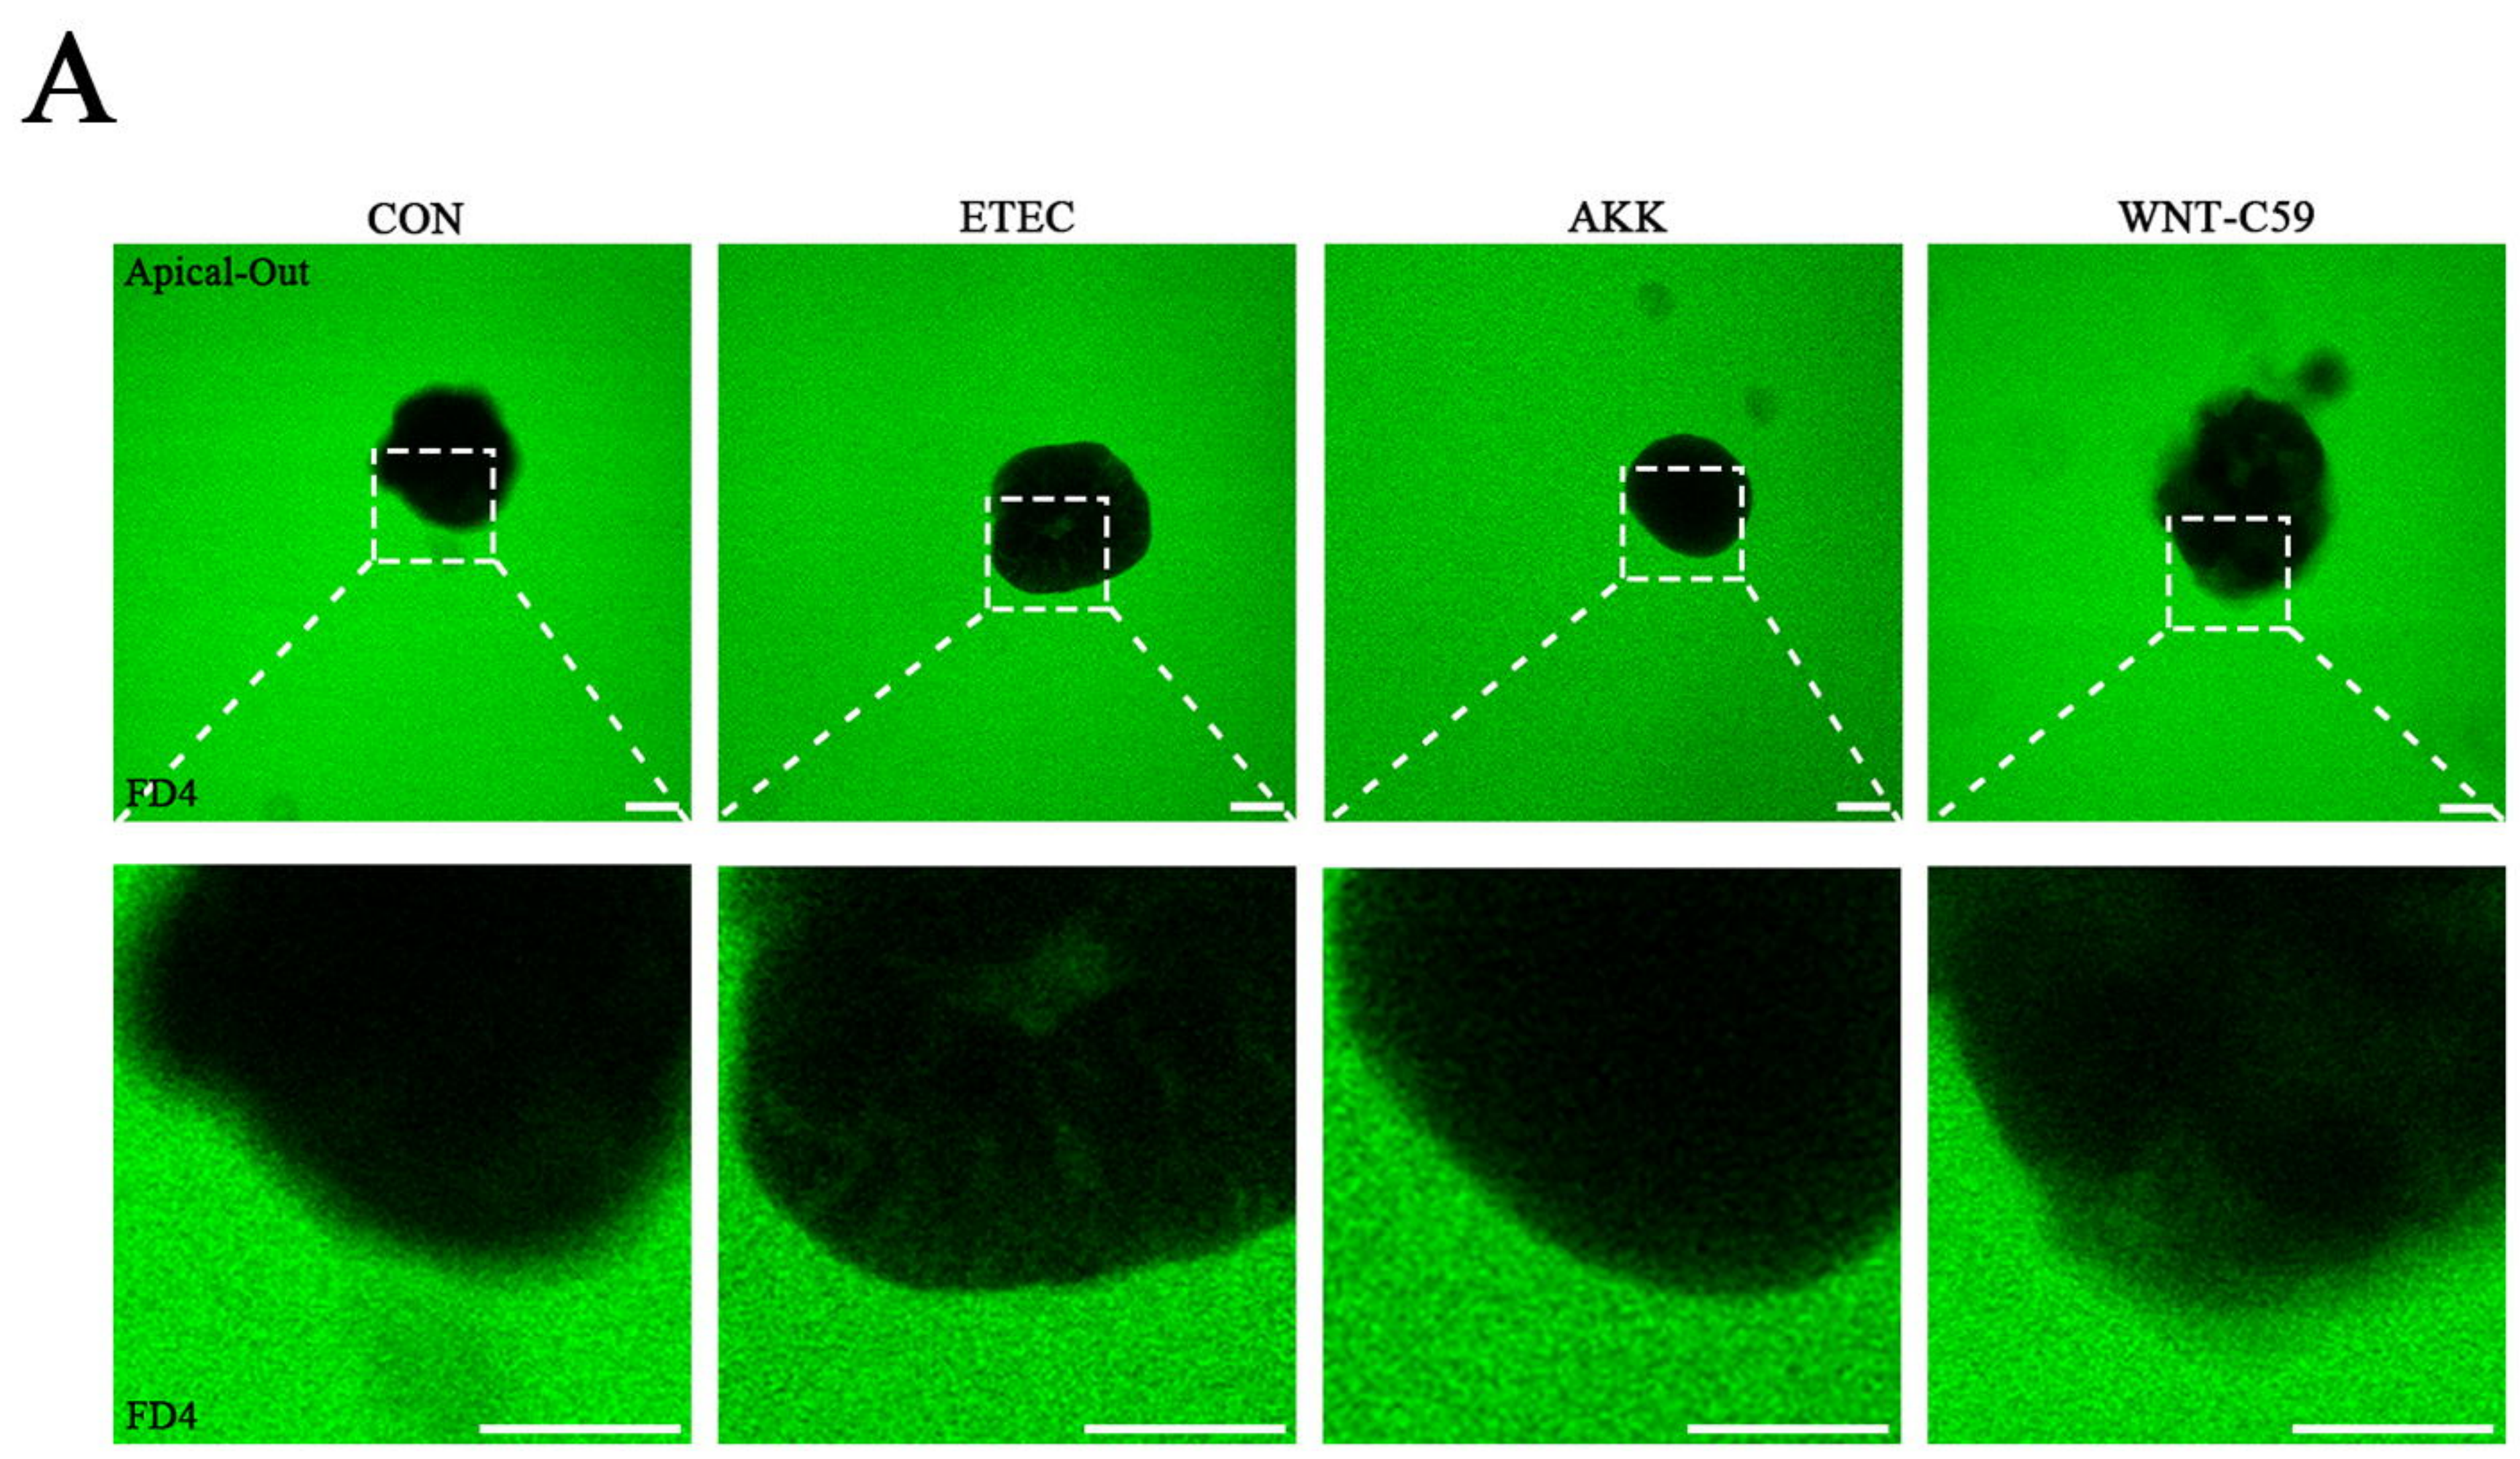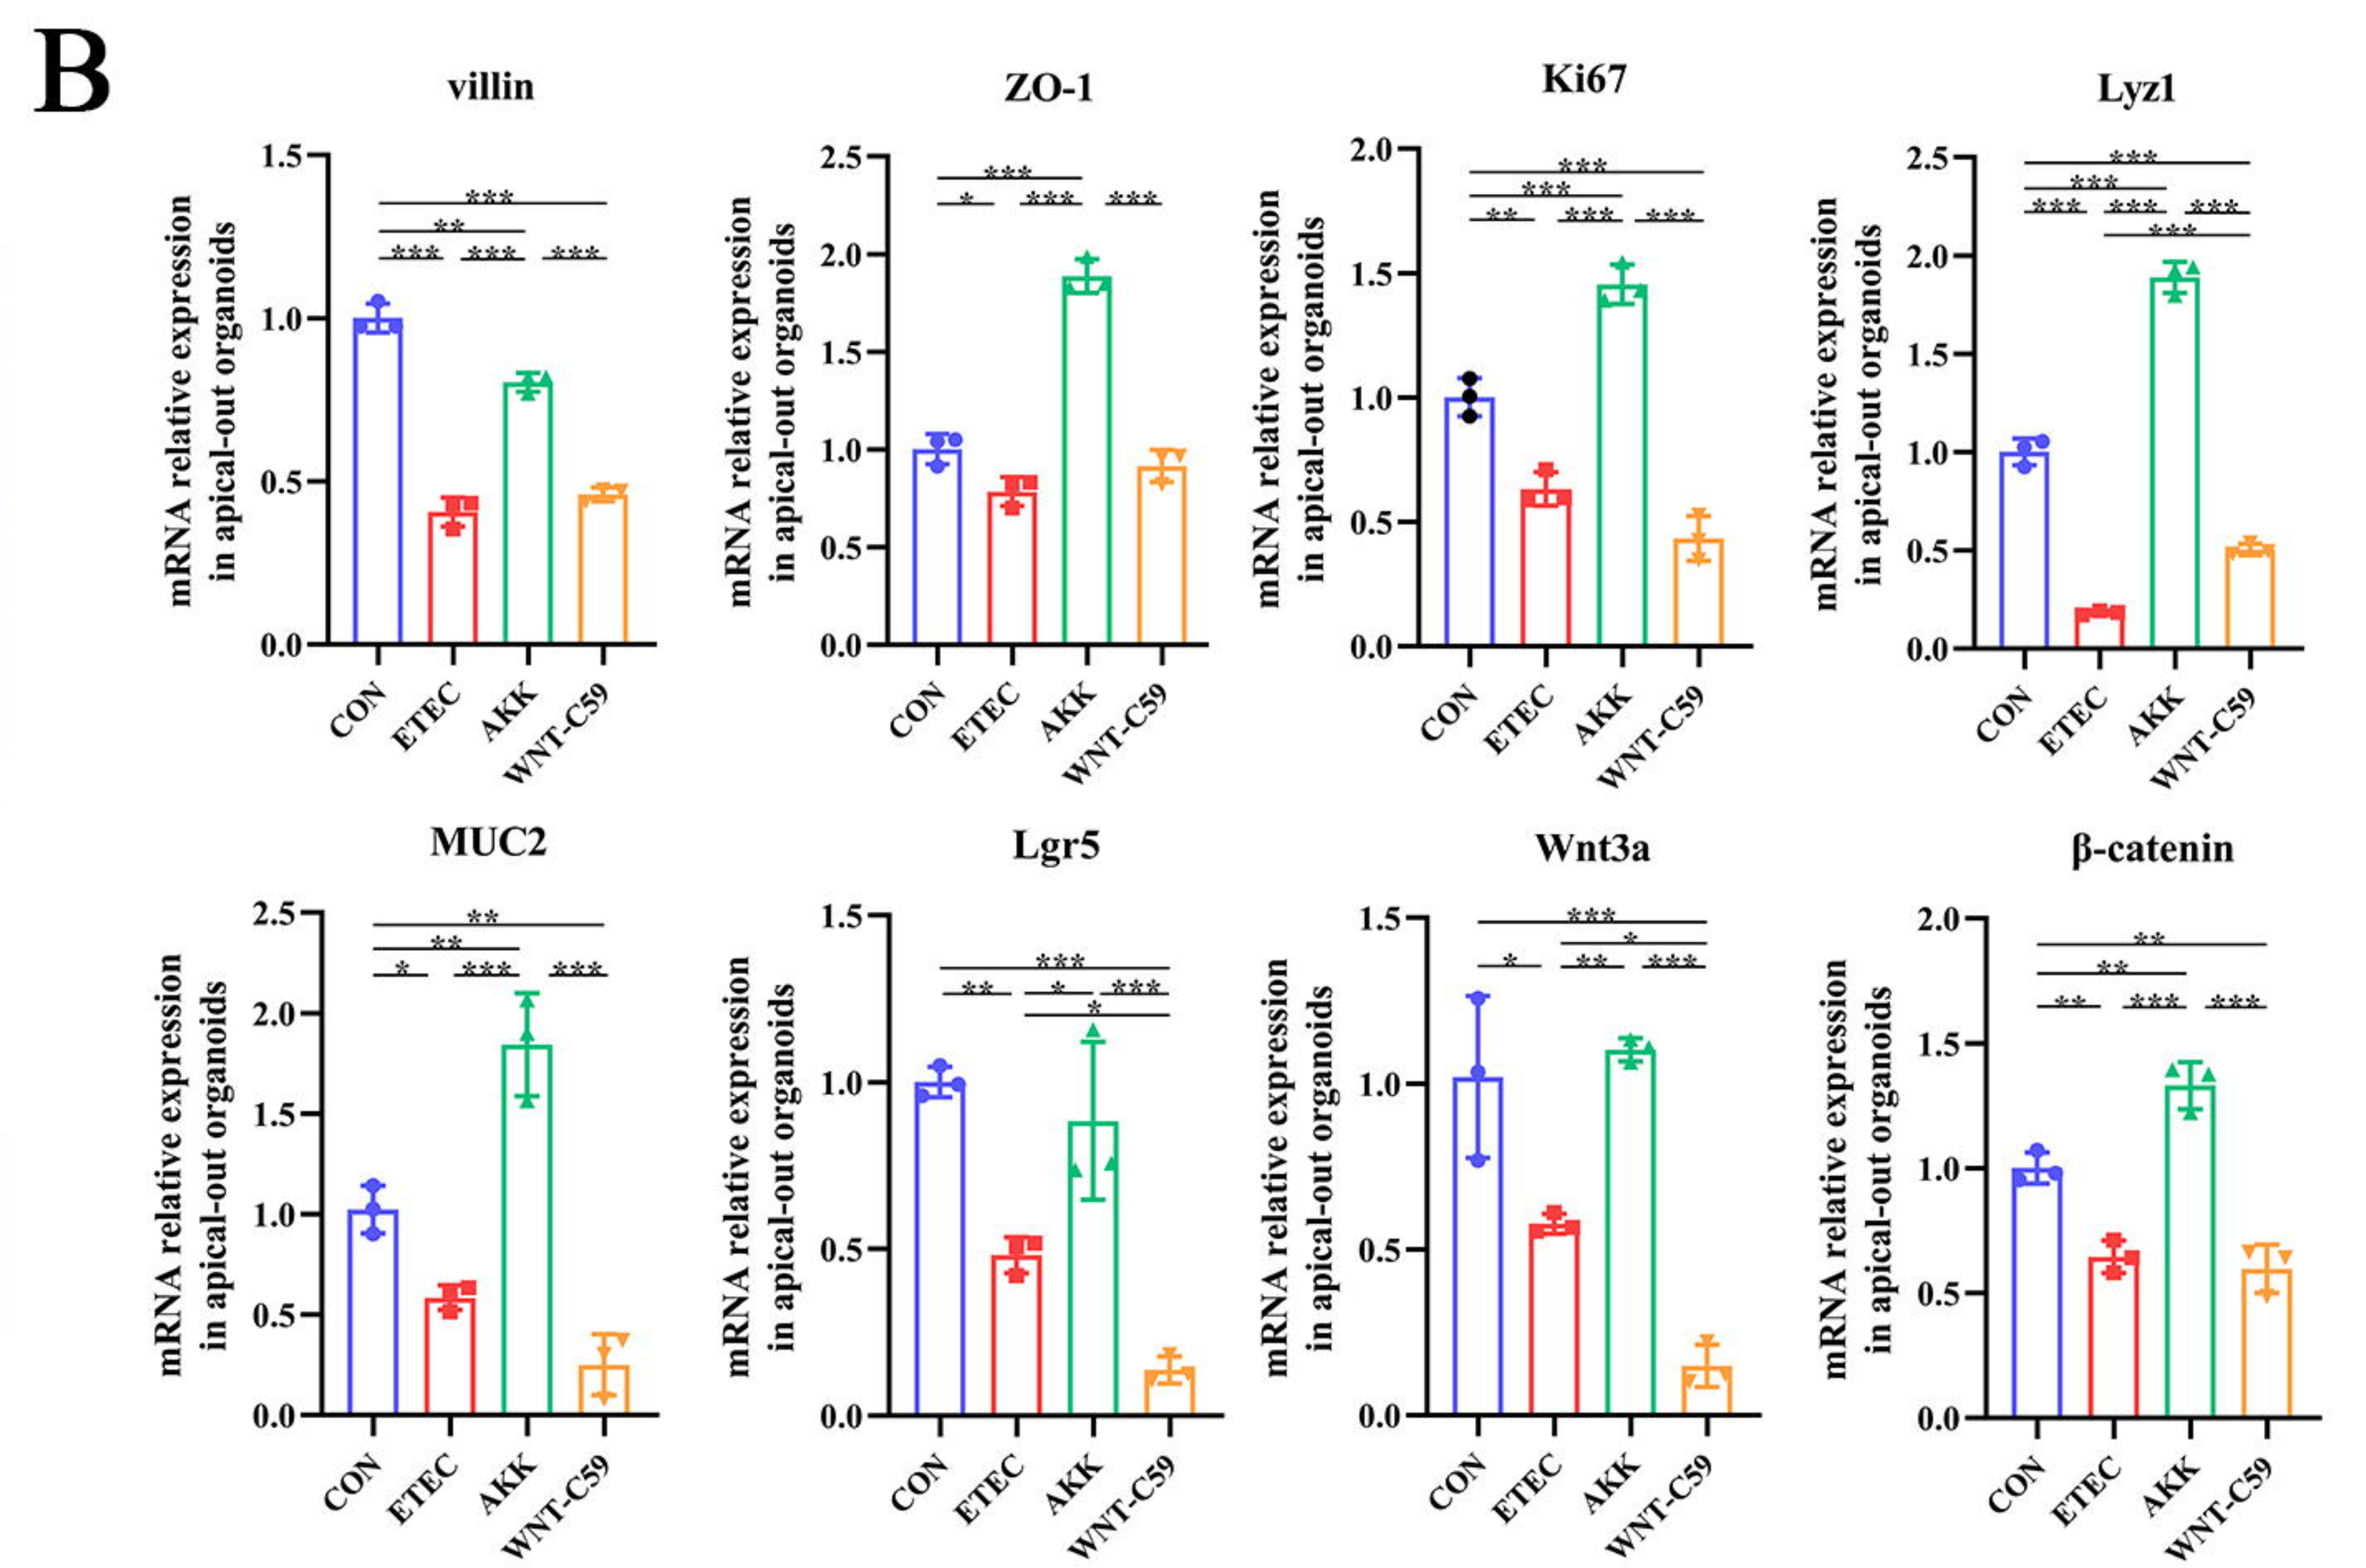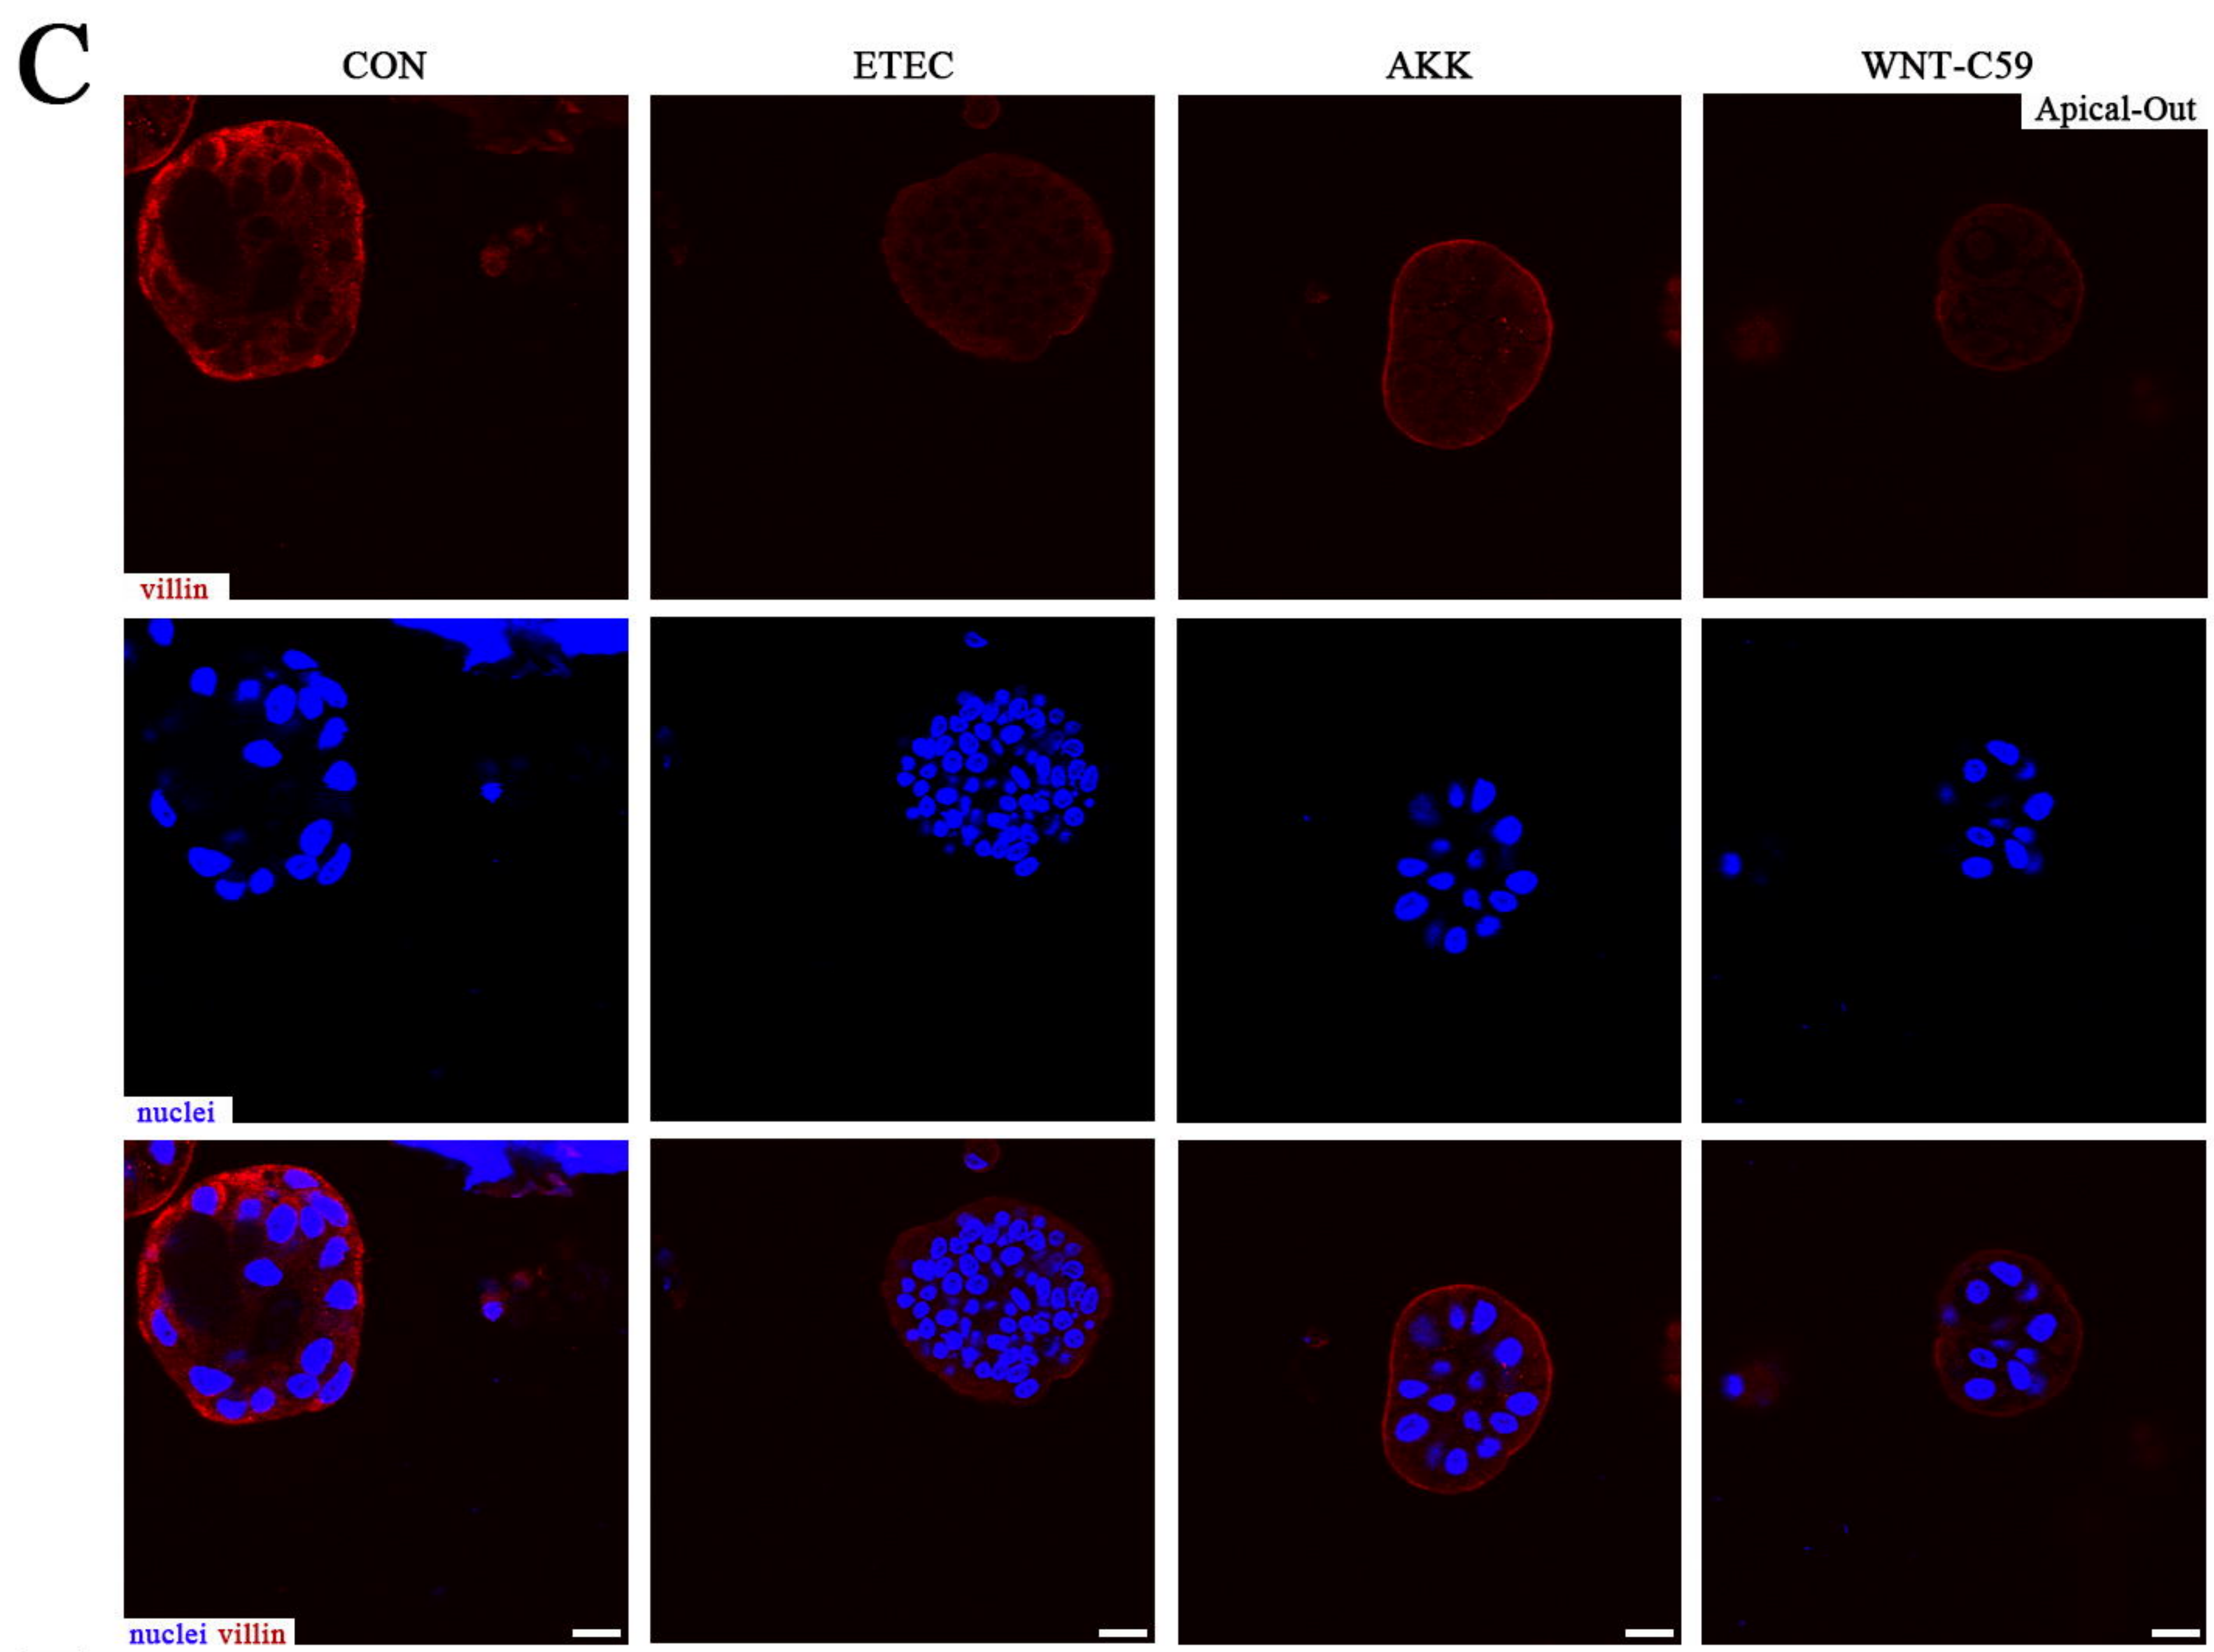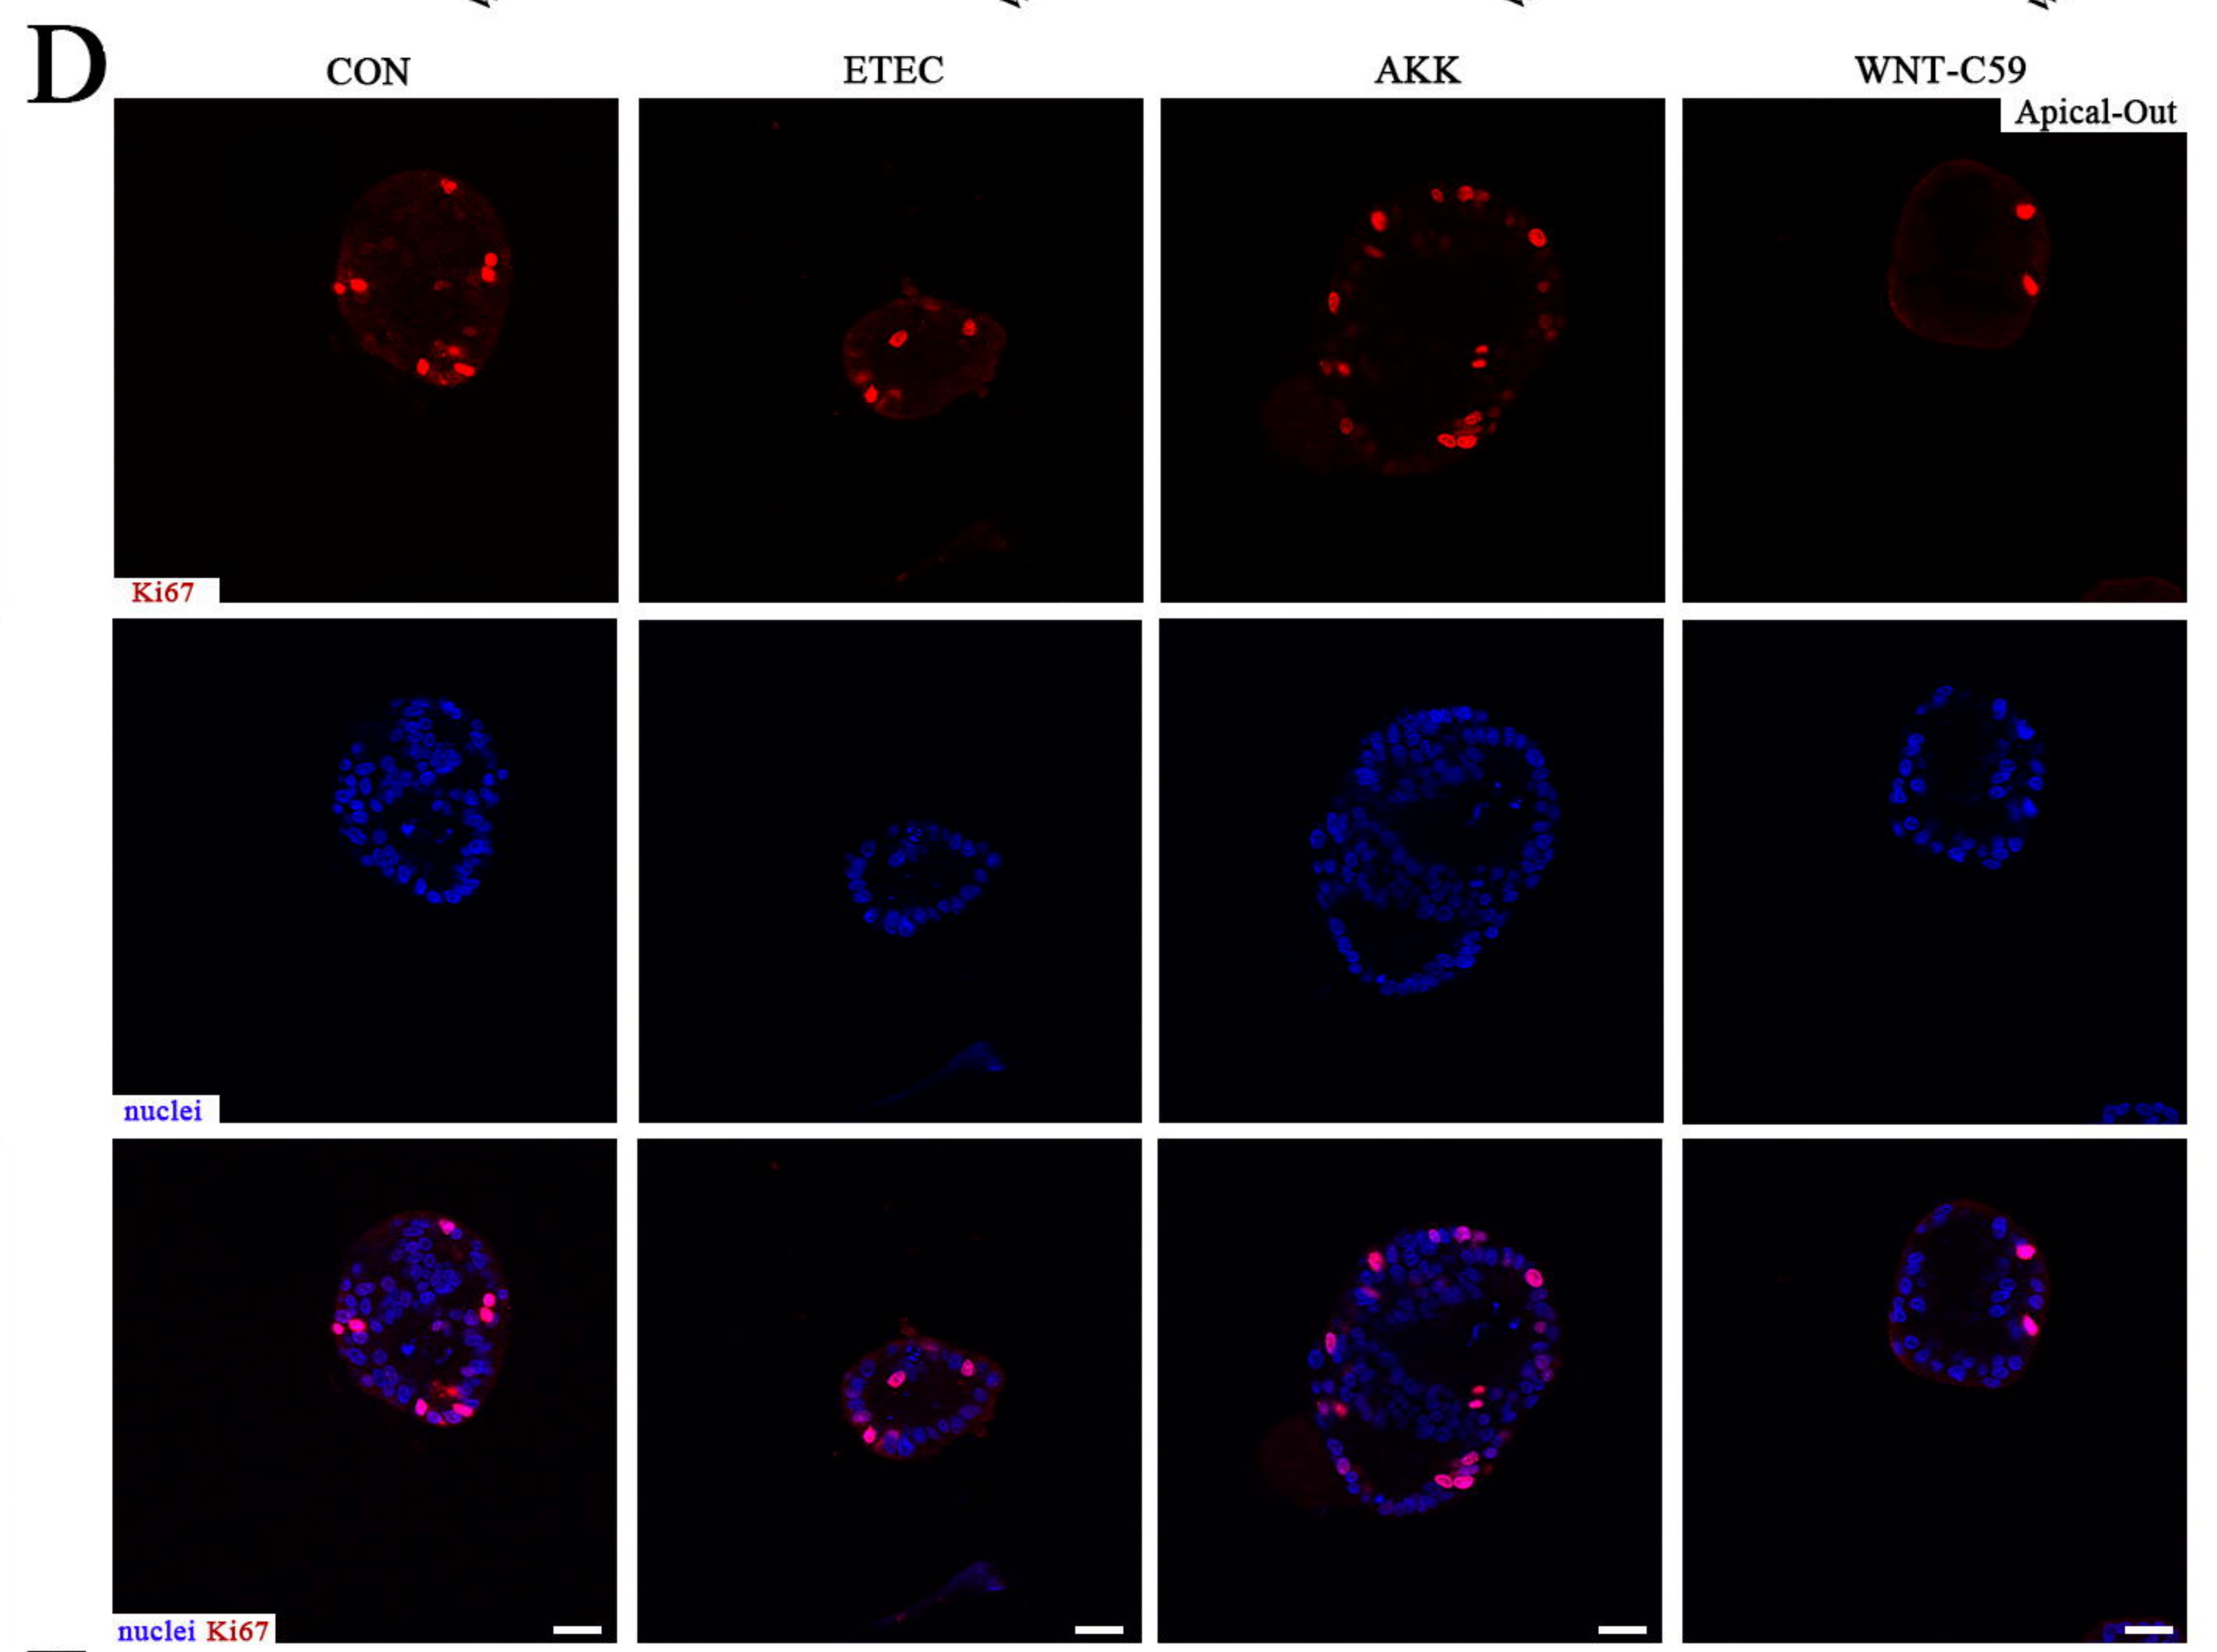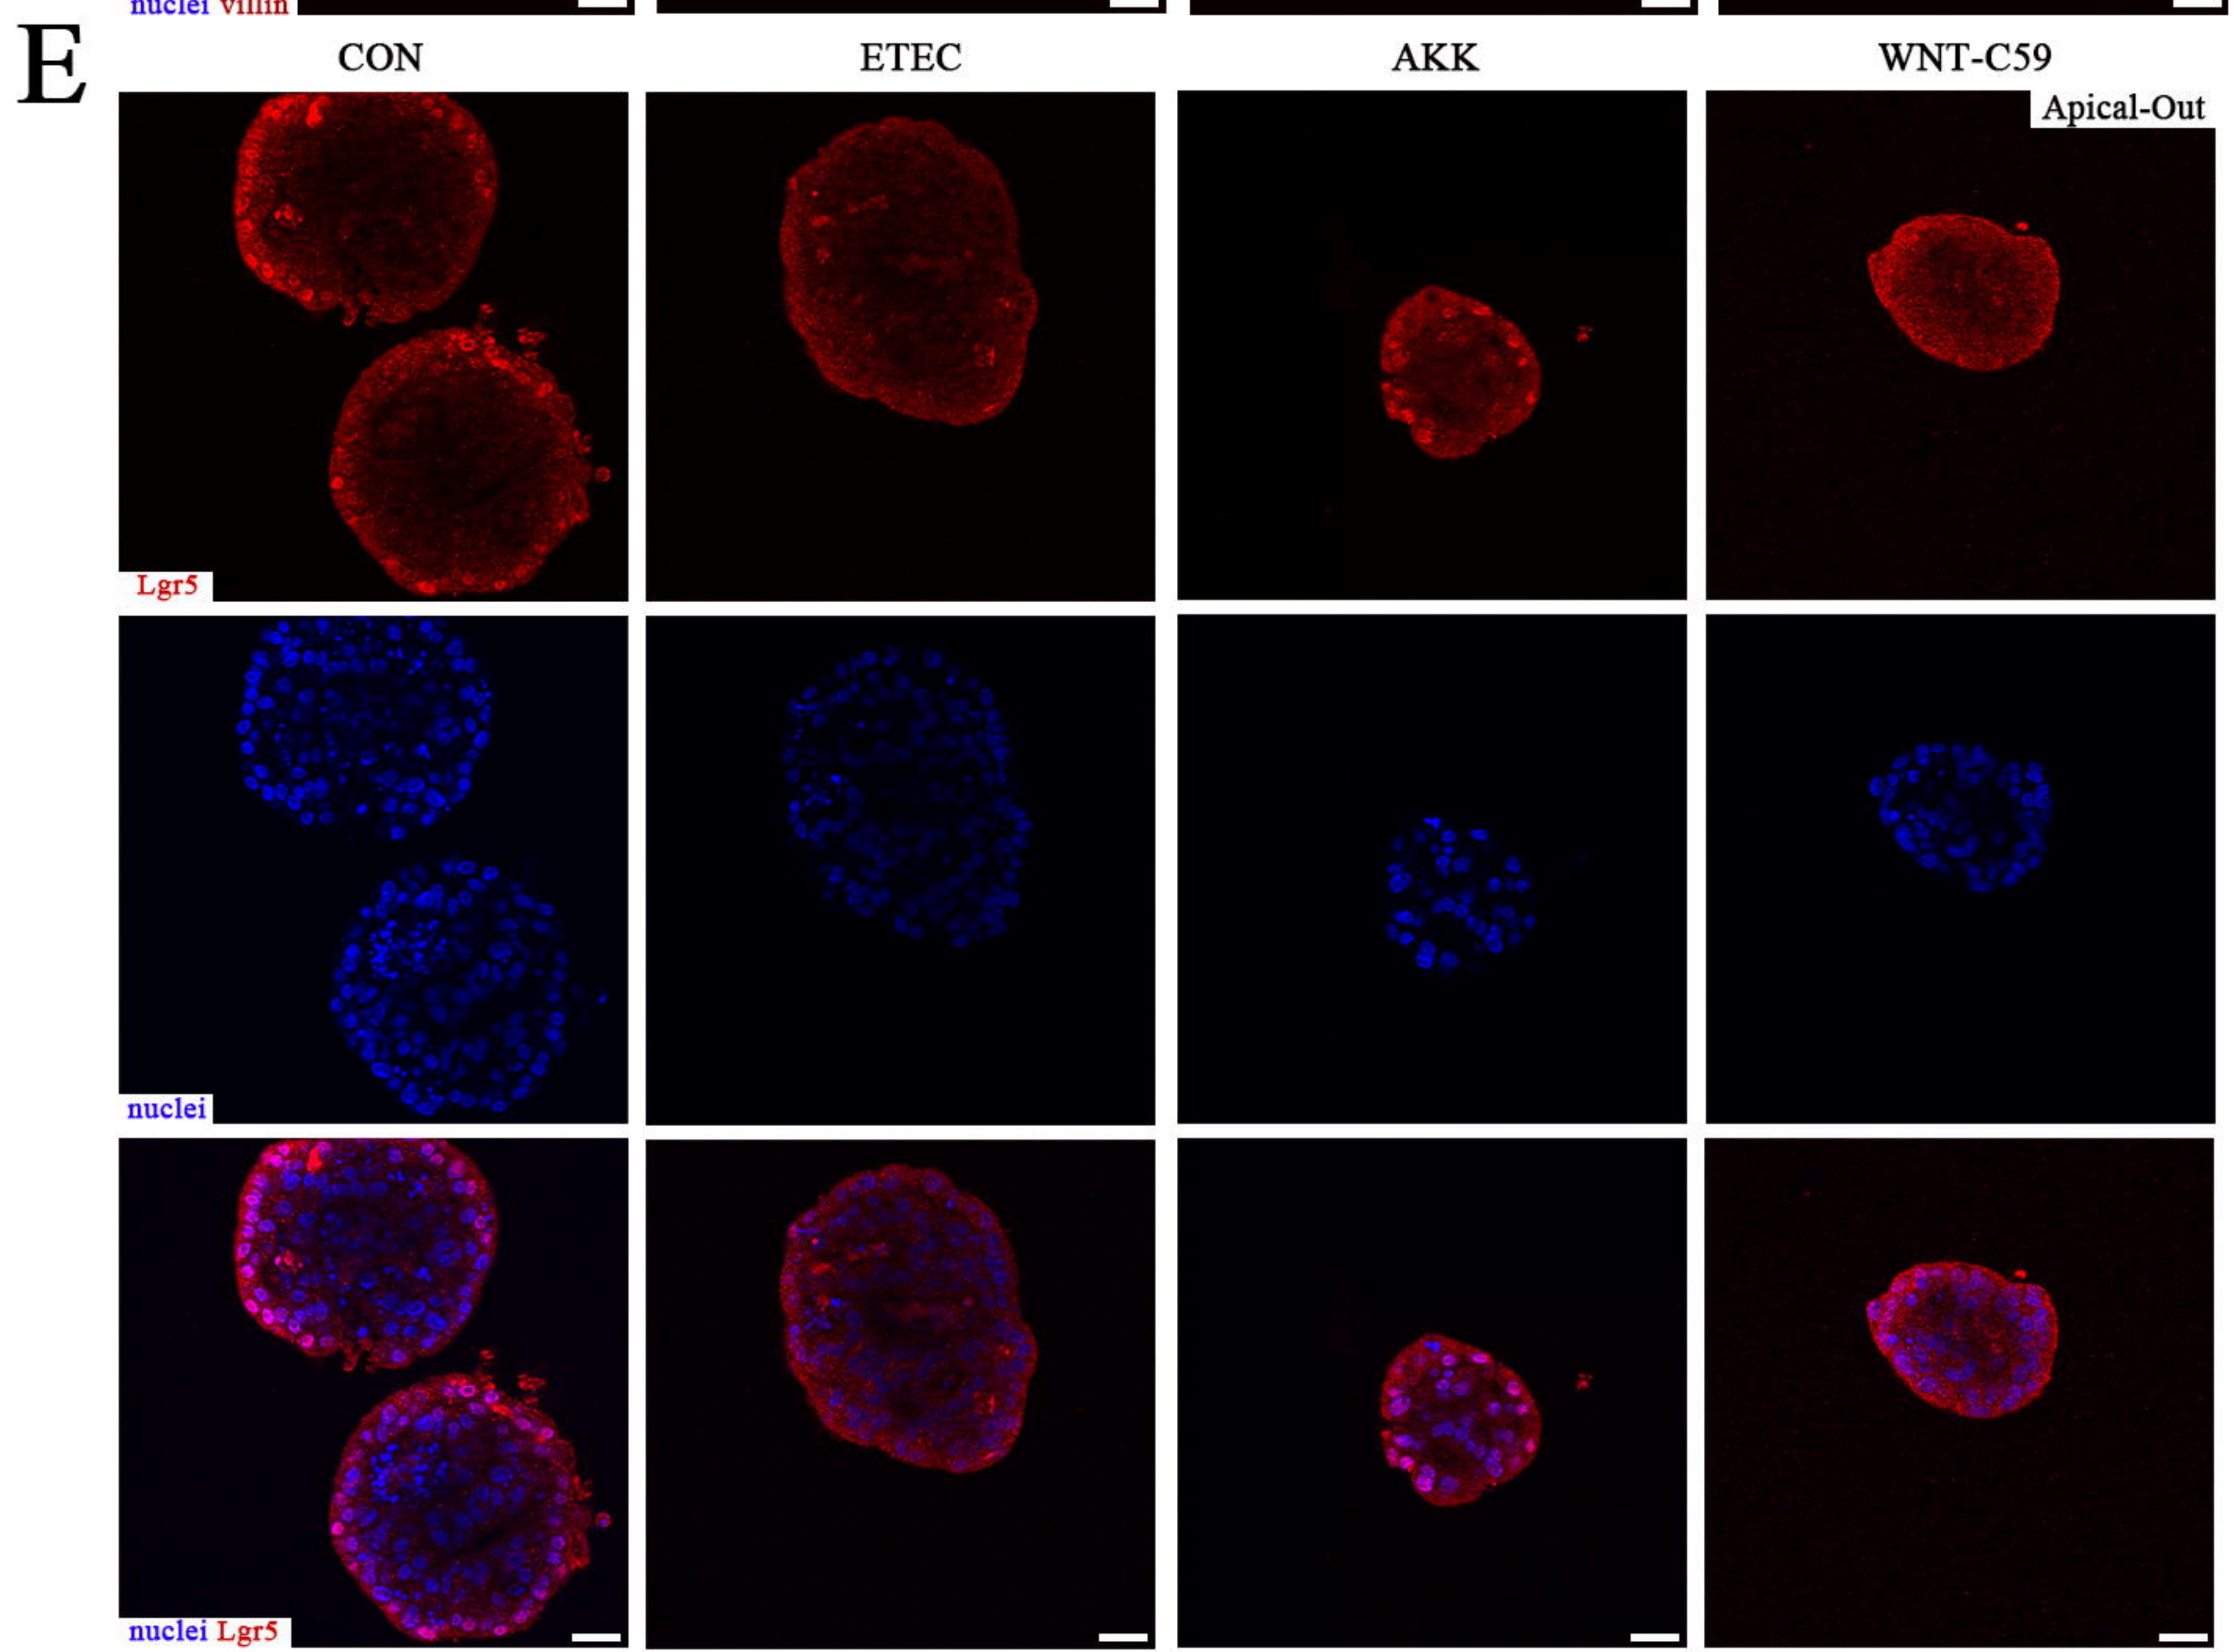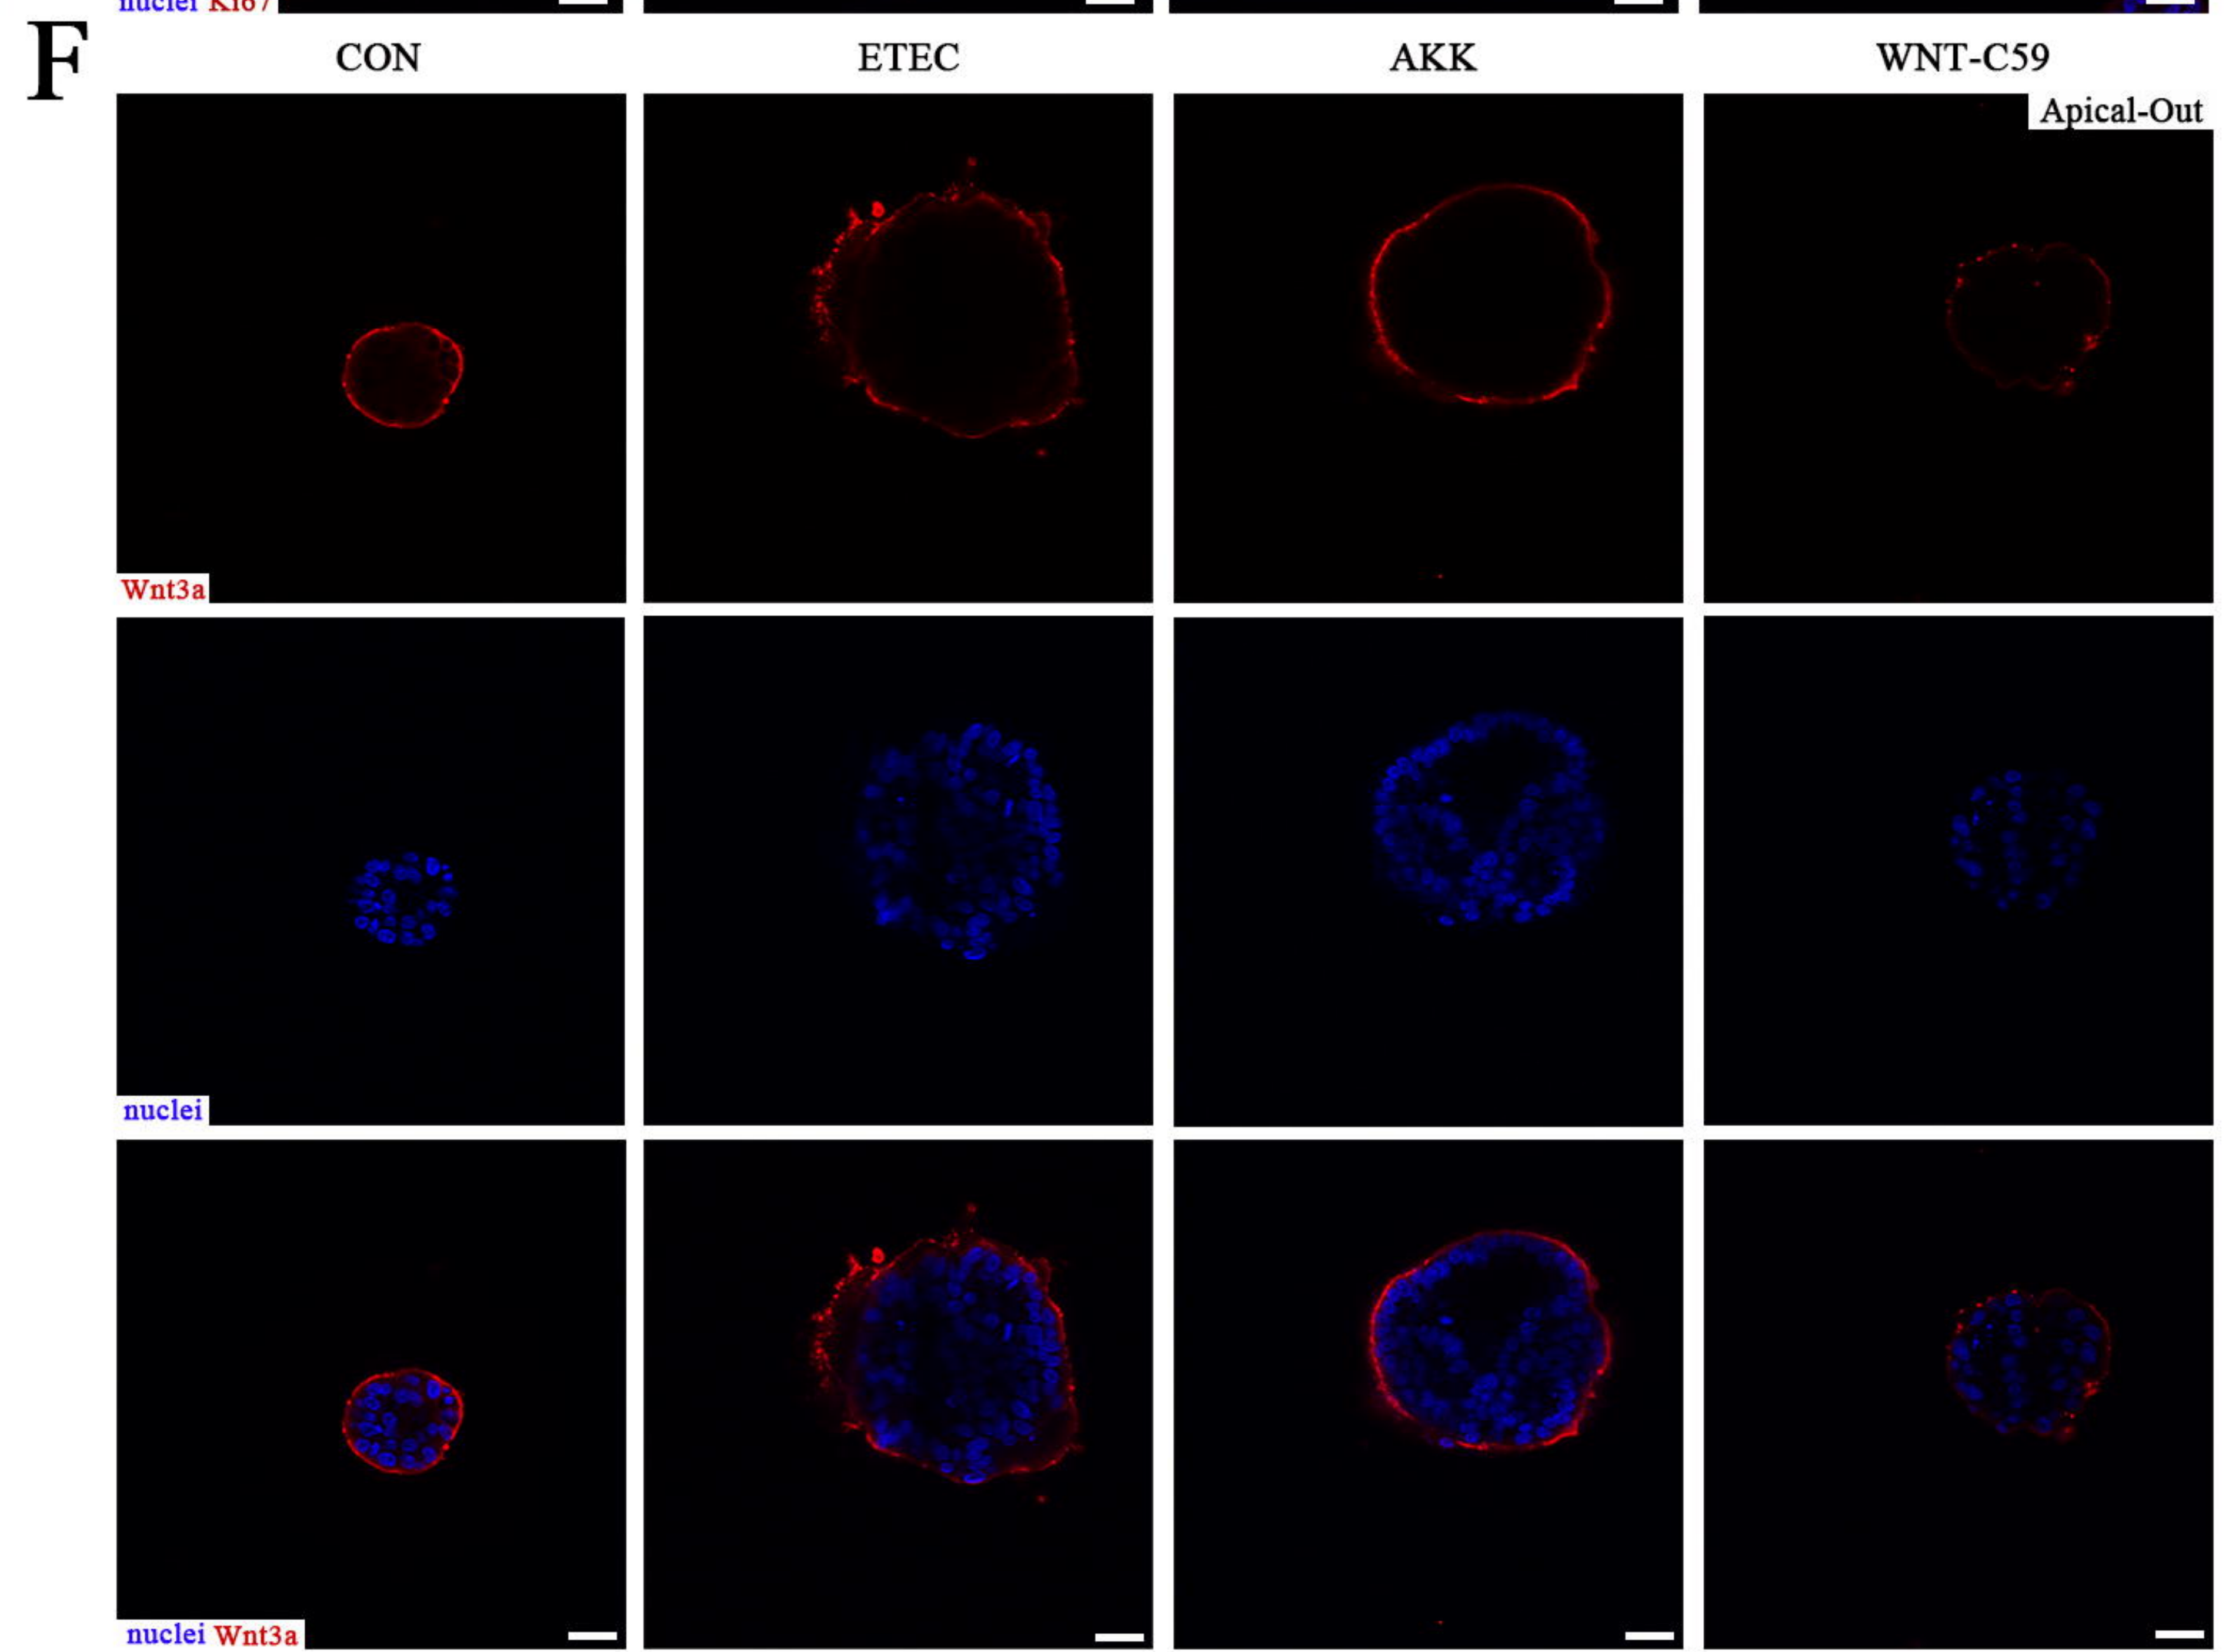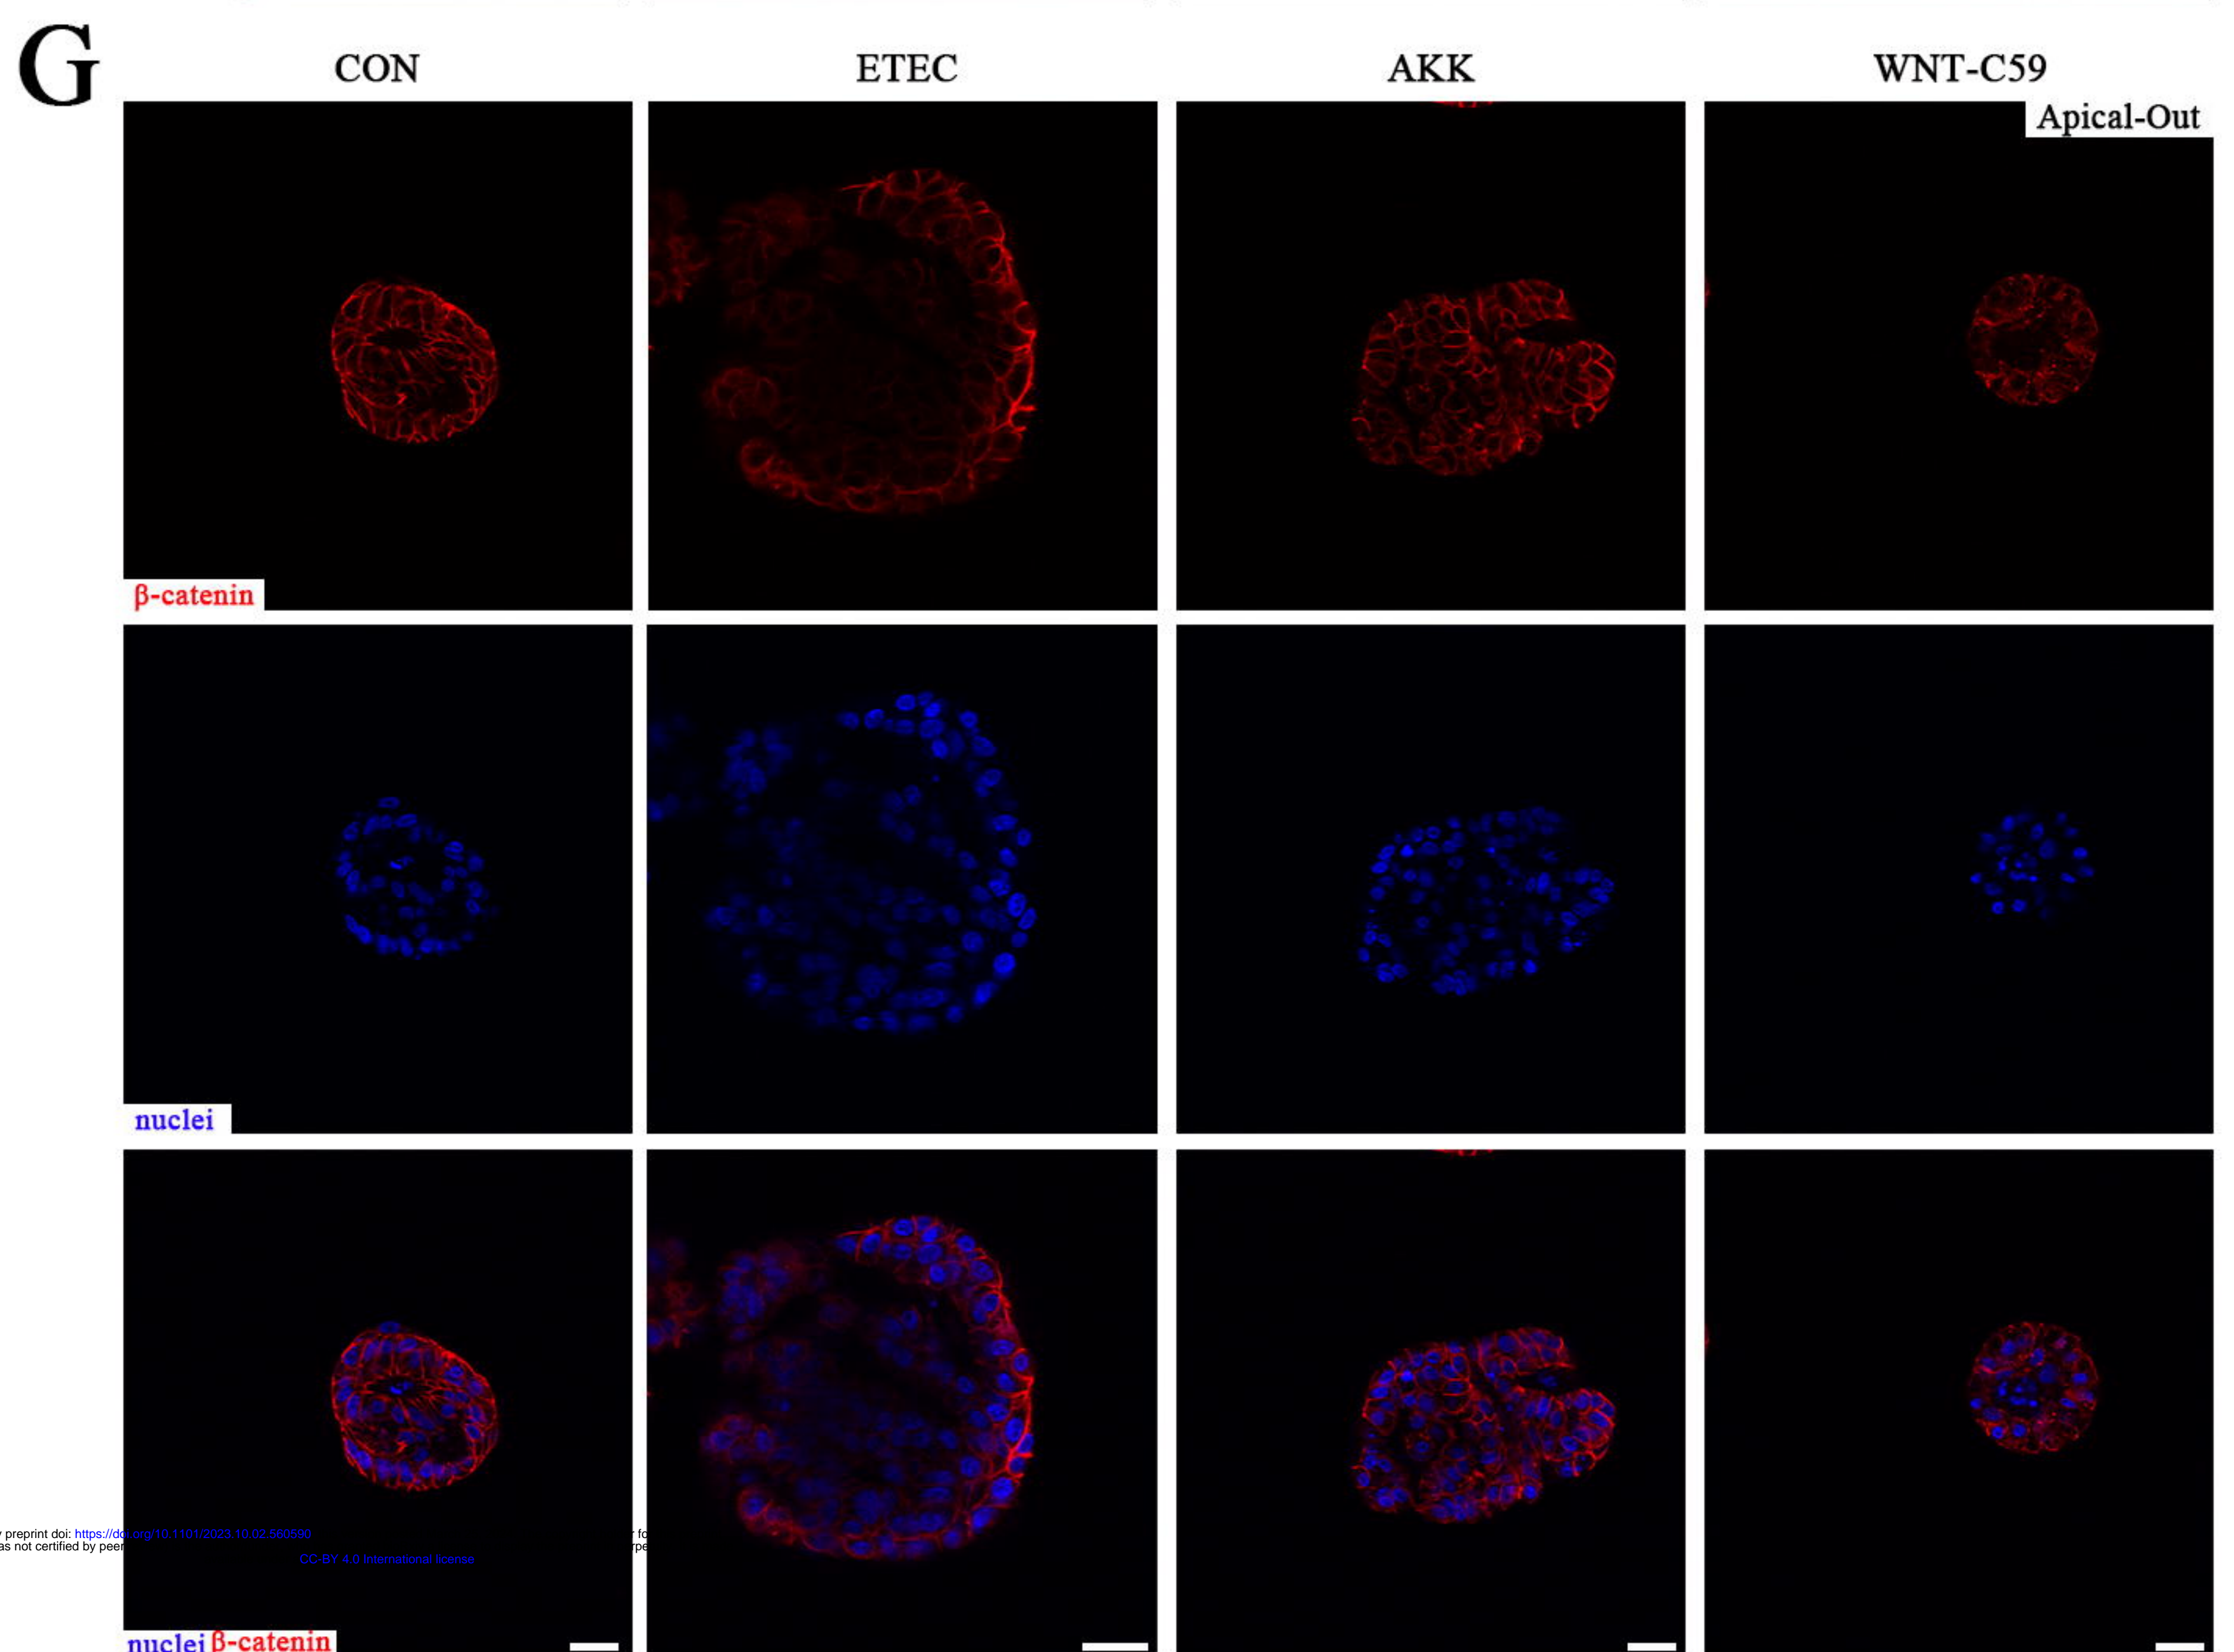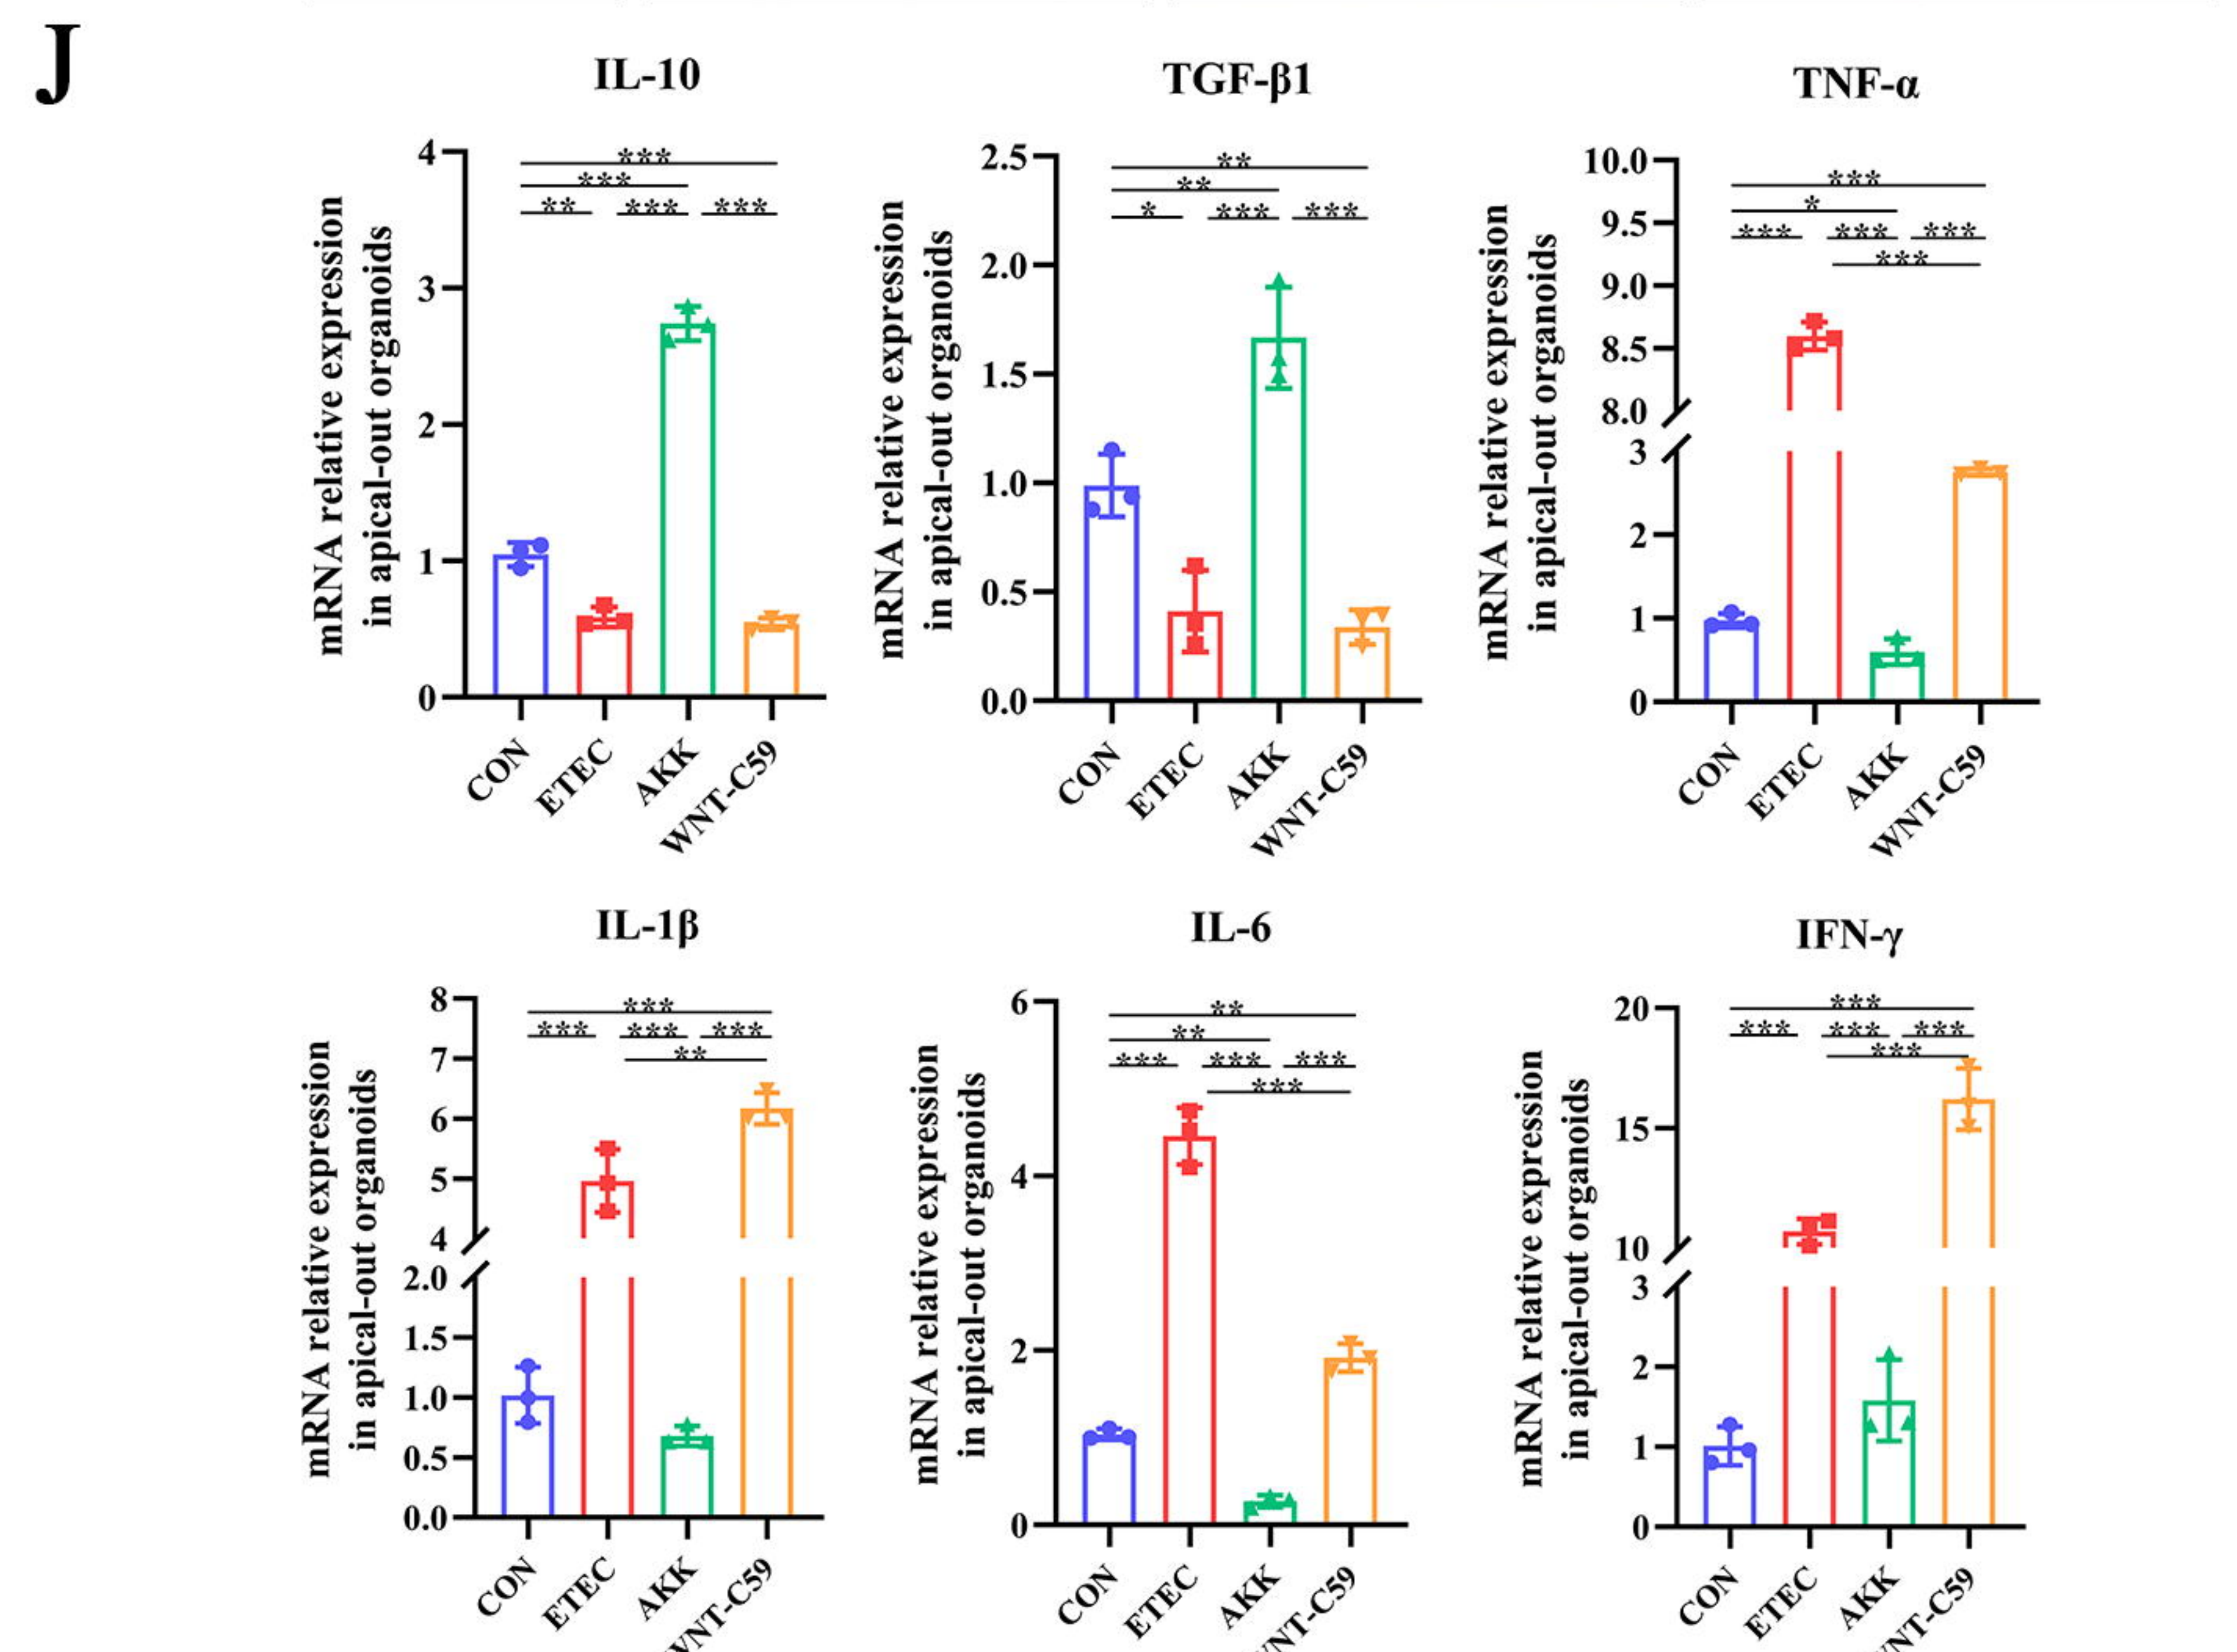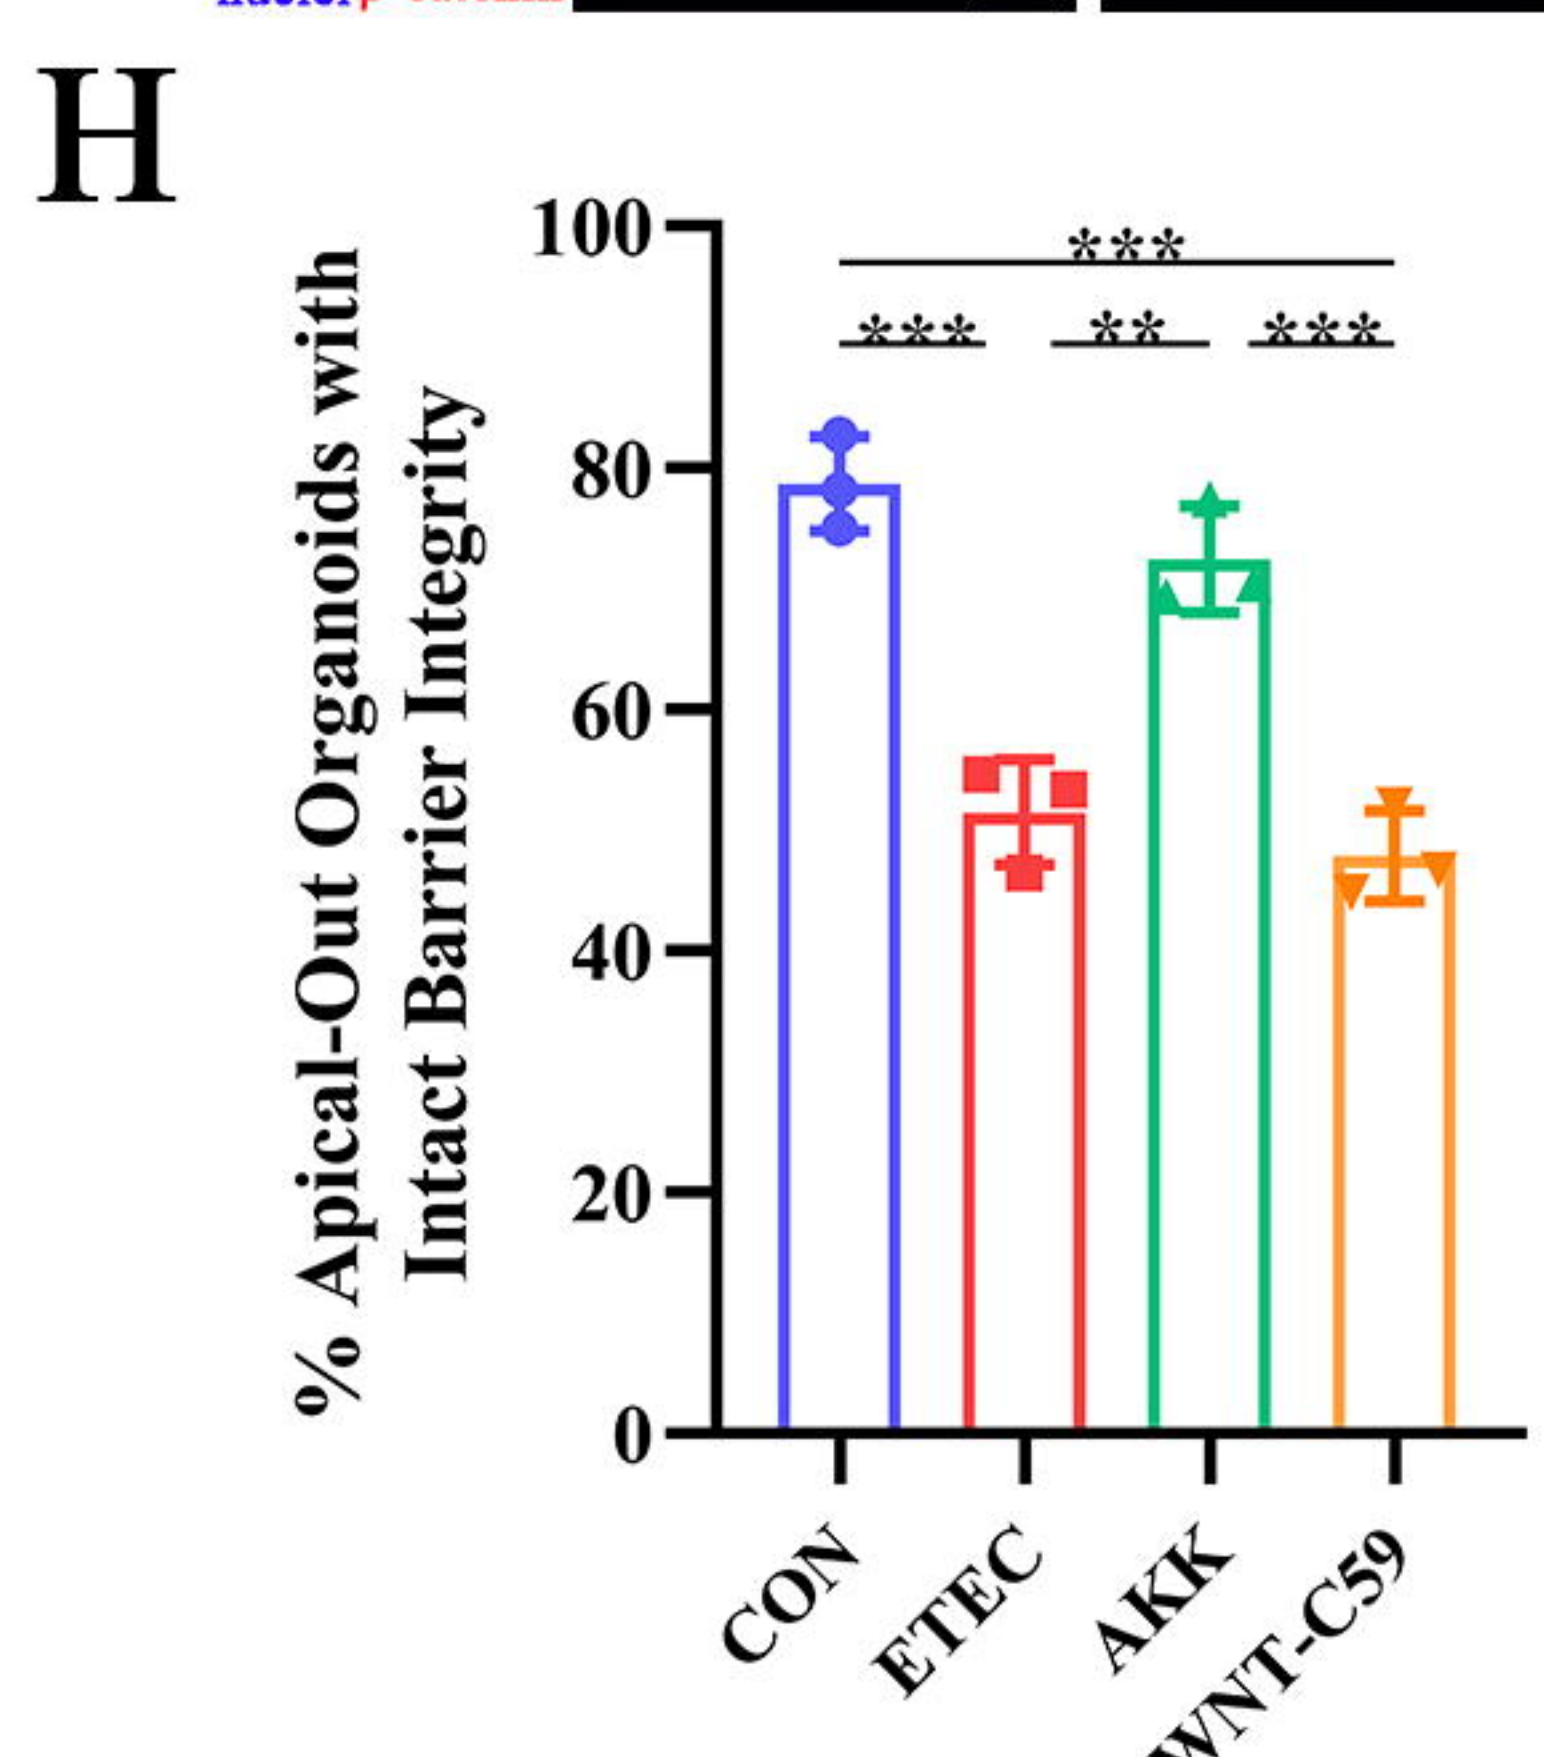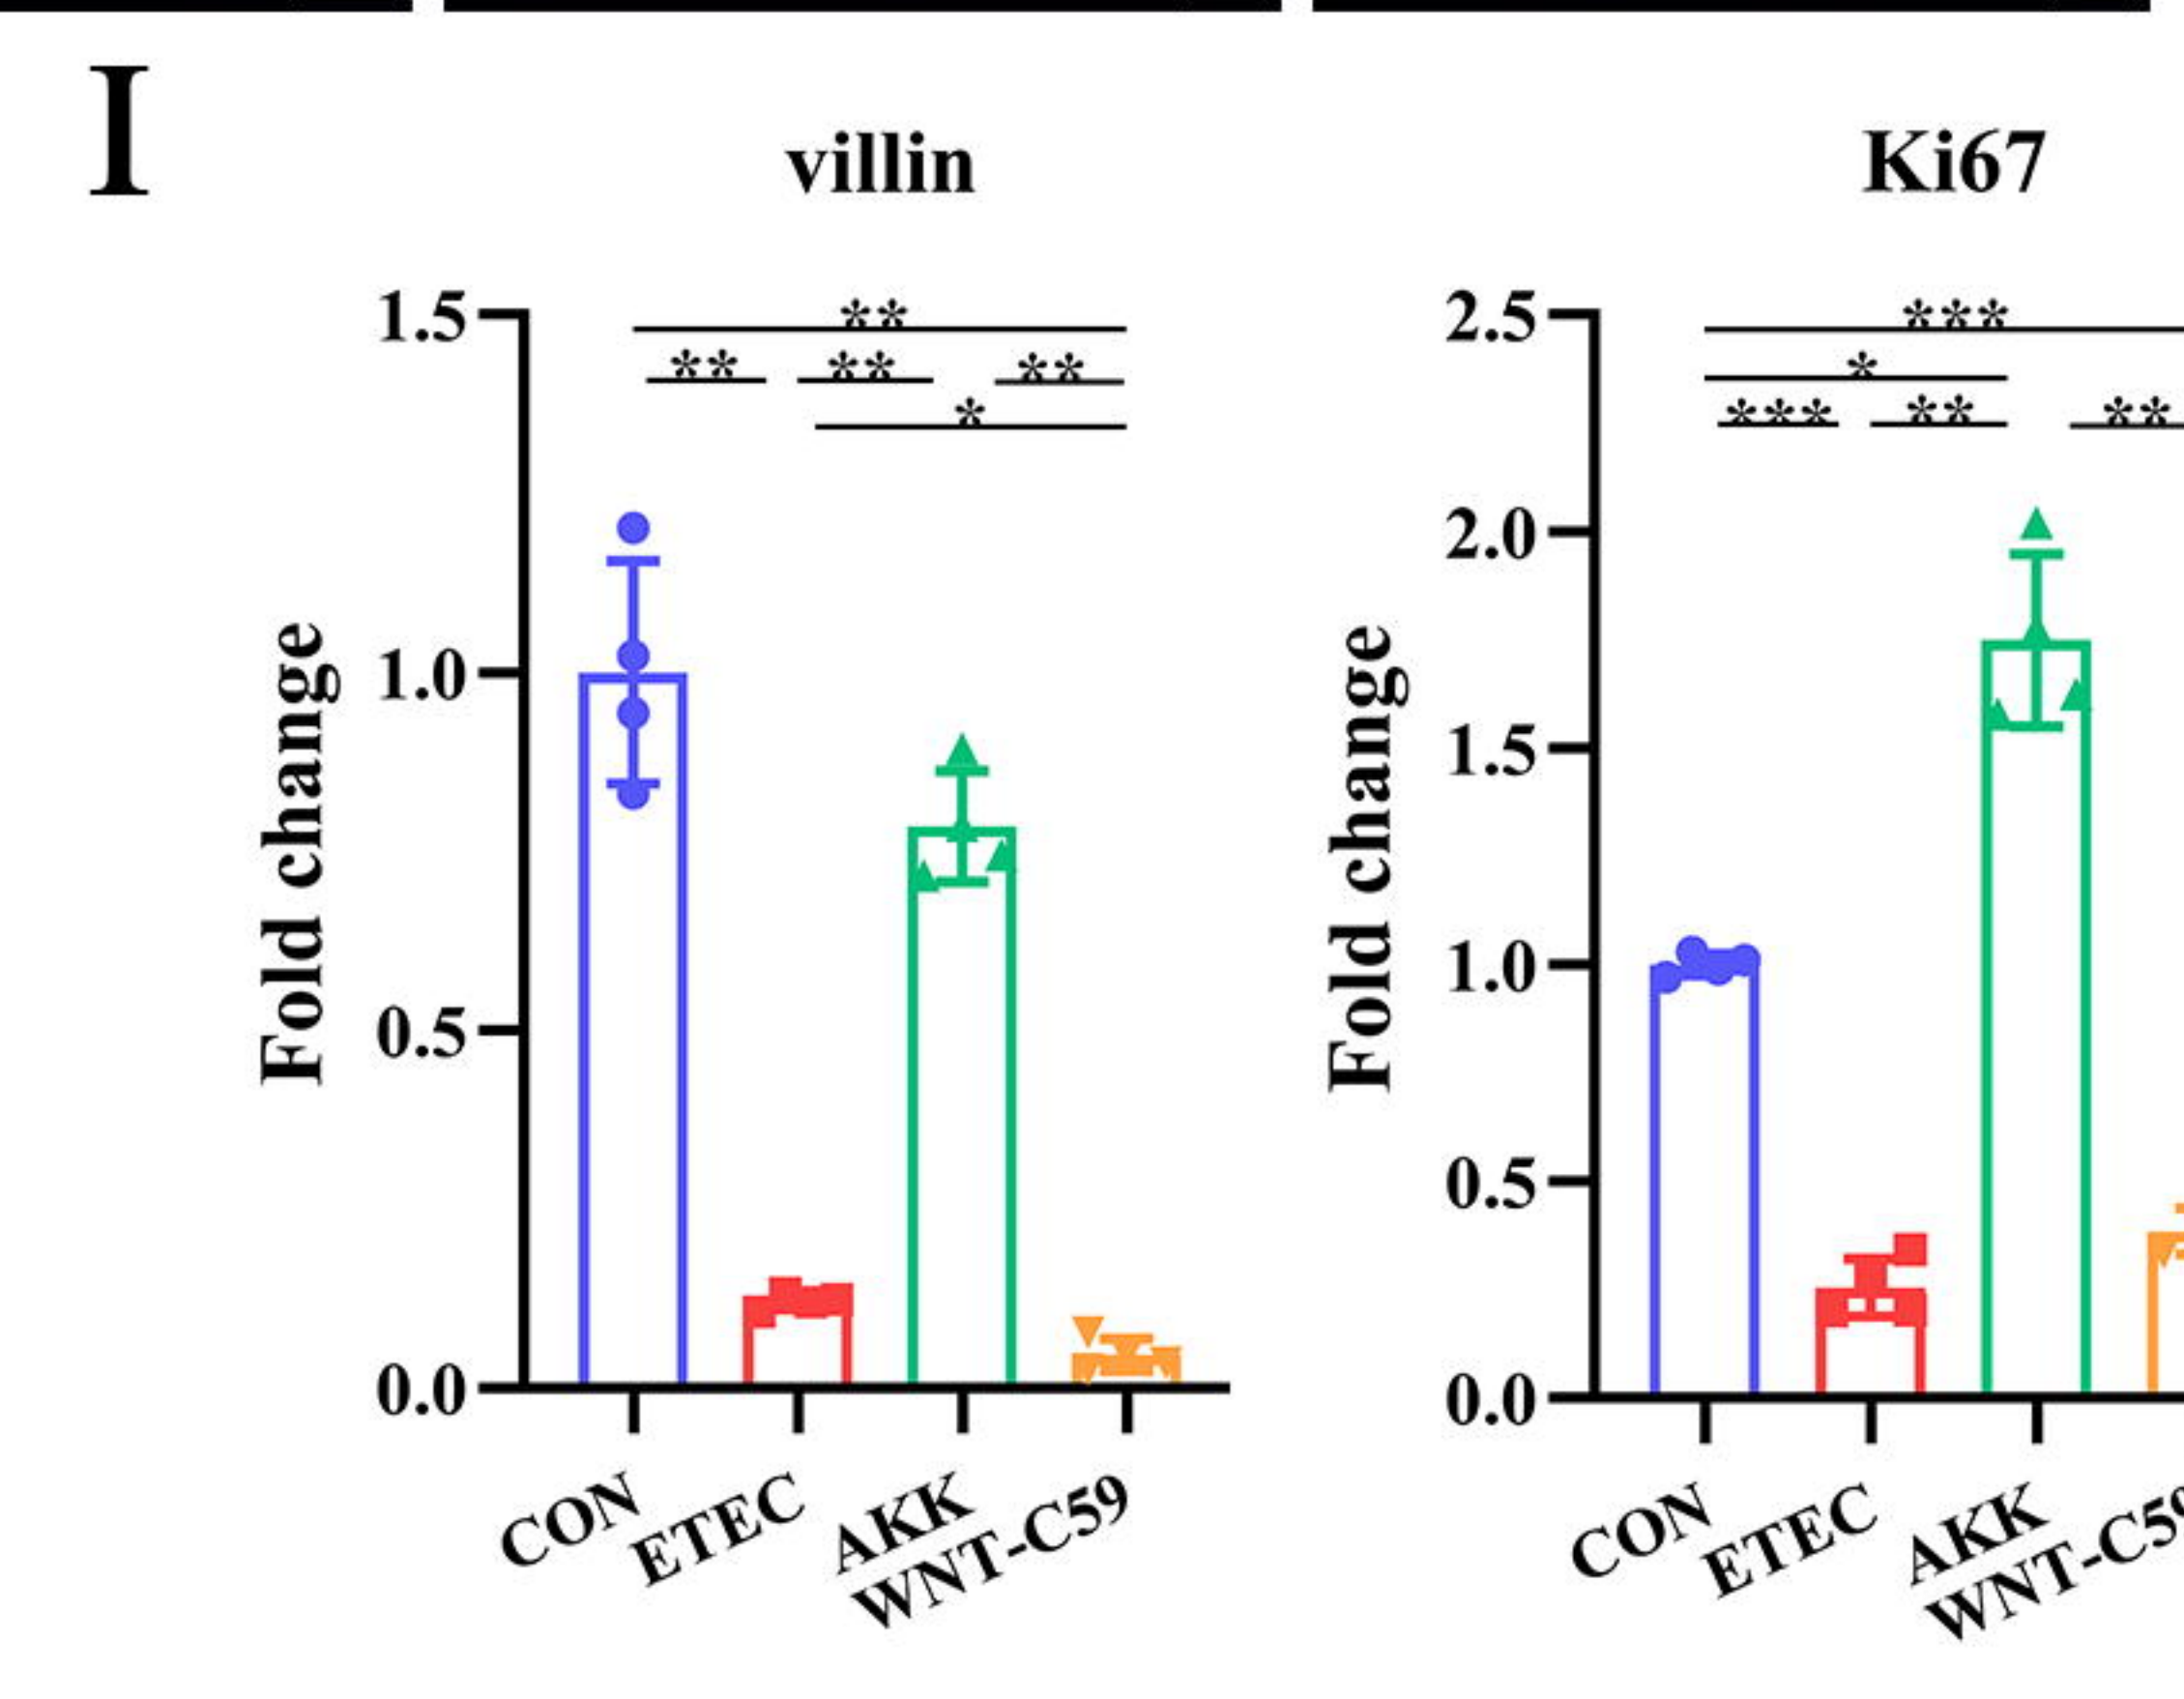

Source: https://www.biorxiv.org/content/biorxiv/early/2024/03/25/2023.10.02.560590.full.pdf
